# Supplementary material for: Adolescent health and well-being check-up programme in three African cities (Y-Check): protocol for a multimethod, prospective, hybrid implementation-effectiveness study
Source: PubMed Central journal article supplement (PMC11331354; doi:10.1136/bmjopen-2023-077533), 2024-06-21
Supplement: bmjopen-2023-077533.draft_revisions.pdf [file bmjopen-2023-077533.draft_revisions.pdf]

# BMJ Open

BMJ Open is committed to open peer review. As part of this commitment we make the peer review history of every article we publish publicly available.

When an article is published we post the peer reviewers' comments and the authors' responses online. We also post the versions of the paper that were used during peer review. These are the versions that the peer review comments apply to.

The versions of the paper that follow are the versions that were submitted during the peer review process. They are not the versions of record or the final published versions. They should not be cited or distributed as the published version of this manuscript.

BMJ Open is an open access journal and the full, final, typeset and author-corrected version of record of the manuscript is available on our site with no access controls, subscription charges or pay-per-view fees (<http://bmjopen.bmj.com>).

If you have any questions on BMJ Open's open peer review process please email [info.bmjopen@bmj.com](mailto:info.bmjopen@bmj.com)

# BMJ Open

## An adolescent health and wellbeing check-up programme in three African cities (Y-Check): protocol for a multimethod, prospective, hybrid implementation-effectiveness study

|                               |                                                                                                                                                                                                                                                                                                                                                                                                                                                                                                                                                                                                                                                                                                                                                                                                                                                                                                                                 |
|-------------------------------|---------------------------------------------------------------------------------------------------------------------------------------------------------------------------------------------------------------------------------------------------------------------------------------------------------------------------------------------------------------------------------------------------------------------------------------------------------------------------------------------------------------------------------------------------------------------------------------------------------------------------------------------------------------------------------------------------------------------------------------------------------------------------------------------------------------------------------------------------------------------------------------------------------------------------------|
| Journal:                      | <i>BMJ Open</i>                                                                                                                                                                                                                                                                                                                                                                                                                                                                                                                                                                                                                                                                                                                                                                                                                                                                                                                 |
| Manuscript ID                 | bmjopen-2023-077533                                                                                                                                                                                                                                                                                                                                                                                                                                                                                                                                                                                                                                                                                                                                                                                                                                                                                                             |
| Article Type:                 | Protocol                                                                                                                                                                                                                                                                                                                                                                                                                                                                                                                                                                                                                                                                                                                                                                                                                                                                                                                        |
| Date Submitted by the Author: | 07-Jul-2023                                                                                                                                                                                                                                                                                                                                                                                                                                                                                                                                                                                                                                                                                                                                                                                                                                                                                                                     |
| Complete List of Authors:     | Banati, Prerna; World Health Organization, Ross, David Anthony; Stellenbosch University Weobong, Benedict; University of Ghana Kapiga, Saidi ; National Institute for Medical Research Mwanza Research Centre; London School of Hygiene & Tropical Medicine Weiss, Helen; London School of Hygiene & Tropical Medicine Baltag , Valentina; World Health Organization Nzvere, Farirai; London School of Hygiene & Tropical Medicine; Biomedical Research and Training Institute Glozah, Franklin; University of Ghana Nsanya, Mussa; National Institute for Medical Research Mwanza Research Centre Greco, Giulia; London School of Hygiene & Tropical Medicine Ferrand, Rashida; London School of Hygiene & Tropical Medicine, Department of Infectious Disease Epidemiology; Biomedical Research and Training Institute Doyle, Aoife; London School of Hygiene & Tropical Medicine; Biomedical Research and Training Institute |
| Keywords:                     | Adolescent, PUBLIC HEALTH, Mass Screening, Schools                                                                                                                                                                                                                                                                                                                                                                                                                                                                                                                                                                                                                                                                                                                                                                                                                                                                              |
|                               |                                                                                                                                                                                                                                                                                                                                                                                                                                                                                                                                                                                                                                                                                                                                                                                                                                                                                                                                 |

SCHOLARONE™  
Manuscripts

**An adolescent health and wellbeing check-up programme in three African cities (Y-Check): protocol for a multimethod, prospective, hybrid implementation-effectiveness study**

Banati P, PhD MPH<sup>1\*</sup>, Ross DA, MA, BMBCh, MSc, PhD<sup>2</sup> Weobong B, MSc, PhD<sup>3</sup>, Kapiga S, MD, MPH, ScD<sup>4,5</sup>, Weiss HA PhD MSc<sup>6</sup>, Baltag V MD PhD<sup>1</sup>, Nzvere F<sup>5,7</sup>, Glozah F, MPhil, PhD<sup>3</sup>, Nsanya MK, MD, MSc<sup>4</sup>, Greco G, PhD MSc<sup>5</sup>, Ferrand RA, PhD MBBS<sup>5,7</sup>, and Doyle AM, PhD<sup>6,7</sup> for the Y-Check Research Programme Team<sup>8</sup>

<sup>1</sup> Adolescent and Young Adult Health (AYH) Unit, Maternal, Newborn, Child and Adolescent Health and Ageing (MCA) Department, World Health Organization (WHO), Ave Appia 20, 1211 Geneva 27, Switzerland

<sup>2</sup> Institute for Life Course Health Research, Stellenbosch University, Tygerberg, South Africa

<sup>3</sup> University of Ghana School of Public Health, College of Health Sciences (UGSPH), Ghana

<sup>4</sup> Mwanza Intervention Trials Unit, National Institute for Medical Research Mwanza Research Centre (MITU/NIMR), Isamilo, Mwanza, United Republic of Tanzania

<sup>5</sup> Department of Infectious Disease Epidemiology, London School of Hygiene and Tropical Medicine, Keppel St, London WC1E 7HT, UK

<sup>6</sup> MRC International Statistics and Epidemiology Group, London School of Hygiene & Tropical Medicine, Keppel St, London WC1E 7HT, UK

<sup>7</sup> Biomedical Research and Training Institute (BRTI), 10 Seagrave Road, Avondale, Harare, Zimbabwe

<sup>8</sup> The Y-Check Research Programme Team in alphabetical order includes Prof. Philip B. Adongo, MA, PhD, Department of Social and Behavioural Sciences, School of Public Health, University of Ghana; Mr. Kenneth. S. Adde, MPhil, Department of Population and Health, University of Cape Coast; Prof Evans Agbeno, FGCS, MPH, MBChB, Department of Obstetrics & Gynaecology, University of Cape Coast; Prof. Patricia Akweongo, MA, PhD, Department of Health Policy Planning and Management, School of Public Health, University of Ghana; Ms Tsitsi Bandason MSc, The Health Research Unit Zimbabwe/ Biomedical Research and Training Institute; Dr. Sarah Bernays, PhD MA, Global Health and Development, London School of Hygiene and Tropical Medicine and School of Public Health, University of Sydney; Dr Rudo Chingono PhD, The Health Research Unit Zimbabwe/ Biomedical Research and Training Institute Dr Chido Dziva Chikwari PhD, MSc, BSc, The Health Research Unit Zimbabwe/ Biomedical Research and Training Institute and MRC International Statistics & Epidemiology Group, Department of Infectious Disease Epidemiology, London School of Hygiene & Tropical Medicine, London, UK; Ms Ethel Dauya MPH, The Health Research Unit Zimbabwe/ Biomedical Research and Training Institute; Dr. S. Derry, PhD, Department of Bio-Statistics, School of Public Health, University of Ghana; Dr. Eric Koka, MPhil, PhD, Department of Sociology and Anthropology, University of Cape Coast; Dr. Constance Mackworth-Young, PhD MSc, Global Health and Development, London School of Hygiene and Tropical Medicine, Ms. Salome Manyau MSc, The Health Research Unit Zimbabwe/ Biomedical Research and Training Institute; Mr. Bernard A. Owusu, MPhil, Department of Population and Health, University of Cape Coast; Dr. Yovitha Sedekia, MPHDC, PhD, Mwanza Intervention Trials Unit (MITU)/National Institute for Medical Research (NIMR); Dr. Hannah Taylor-Abdulai, MPH, MPhil, PhD, Department of Physician Assistant Studies, University of Cape Coast; ; Dr. Mandi Tembo, PhD, The Health Research Unit Zimbabwe/ Biomedical Research and Training Institute and Department of Global Health and Development, Faculty of Public Health and Policy, London School of Hygiene and Tropical Medicine, London, United Kingdom.

\* Corresponding Author

**Email addresses**

Banati P (banatip@who.int); Ross DA (dross.rbridge@gmail.com); Weobong B (bweobong@ug.edu.gh); Kapiga S (Saidi.Kapiga@lshtm.ac.uk); Weiss HA (Helen.Weiss@lshtm.ac.uk); Baltag V (baltagv@who.int); Nzvere F (Farrie.Nzvere@lshtm.ac.uk); Glozah F (fglozah@ug.edu.gh); Nsanya MK (mussa.nsanya@mitu.or.tz); Greco G (Giulia.Greco@lshtm.ac.uk); Ferrand RA (rashida.ferrand@lshtm.ac.uk); Doyle AM (aoife.doyle@lshtm.ac.uk)

## Article Summary

### Abstract

**Background:** During adolescence, behaviours are initiated that will have substantial positive or negative impacts on the individual's short- and long-term health and wellbeing, educational attainment and employment prospects. However, adolescents rarely have regular contact with health services, especially for health promotion and disease prevention, and services are not always appropriate for their needs. We co-developed with adolescents a health and wellbeing check-up programme, to improve adolescent health and wellbeing (Y-Check). This paper describes the methods to evaluate the feasibility, acceptability, short-term effects, and cost-effectiveness of Y-Check in three African cities: Cape Coast in Ghana, Mwanza in Tanzania and Chitungwiza in Zimbabwe.

**Method:** This is a multi-country prospective intervention study, with a mixed-method process evaluation, to assess the implementation, effects and short-term cost-effectiveness of Y-Check. The intervention involves screening, on-the-spot care and, if needed, referral of adolescents through health and wellbeing check-up visits in early adolescence (10-14 years) and older adolescence (15-19 years old). In each city, the intervention will be delivered to 2000 adolescents recruited in schools (both age groups) or community venues (older adolescents only). The adolescents will be followed-up at 4 months (all three cities) and 12 months (Zimbabwe only). The study will assess the effects of Y-Check on knowledge and behaviours, as well as clinical outcomes and costs. The primary outcome will be the proportion of those screening positive for at least one condition who receive appropriate on-the-spot care or complete appropriate referral for all identified conditions within four months. Secondary outcomes include yield of untreated conditions, reported health-related risk and protective behaviours, engagement with health services, wellbeing, clinical and educational outcomes. A process evaluation will investigate acceptability, feasibility, uptake, and fidelity, and an economic evaluation will explore cost effectiveness.

1  
2  
3 **Discussion:** This study is innovative in evaluating a comprehensive adolescent health and wellbeing check-  
4  
5 up intervention which addresses both health conditions that impact on wellbeing during adolescence, and  
6  
7 risk factors for future ill-health or lack of wellbeing in three African cities. Evidence of the intervention's  
8  
9 feasibility, acceptability, and short-term positive effects and costs will support larger scale intervention  
10  
11 implementation and rigorous, longer-term evaluation.  
12  
13

14 **Keywords:** Adolescent, health, wellbeing, check-ups, screening, implementation research, effectiveness,  
15 cost-effectiveness  
16  
17

18 **Trial registration:** NCT06090006  
19  
20  
21  
22  
23  
24  
25  
26  
27  
28  
29  
30  
31  
32  
33  
34  
35  
36  
37  
38  
39  
40  
41  
42  
43  
44  
45  
46  
47  
48  
49  
50  
51  
52  
53  
54  
55  
56  
57  
58  
59  
60

## Additional information

### Strengths and limitations of the methodology:

- **Strength:** This study will utilize existing health care infrastructure in low- and middle-income country settings, assessing real world implementation situations and therefore it will be relatively straightforward to directly apply the findings to programs.
- **Strength:** This is a relatively large study of 6000 adolescents in 3 countries. The study takes the views of young people centrally into the design of the intervention.
- **Limitation:** Although the primary outcome is an implementation science / programmatic outcome, the effectiveness data is based on pre-post comparison.
- **Limitation:** This study will have limited ability to assess sustainability of effects over the longer term as the follow up period is 4 months
- **Limitation:** This study is operating in three African cities which may limit generalizability to rural areas.

**Authors' contributions:** DR, AD, PB conceived and drafted the paper. All other authors contributed to writing.

**Funding statement:** This work was supported by the Botnar Foundation grant number (RG21-001) and UKRI (MR/T043156/1)

**Competing interests:** The authors declare no competing interests.

**Ethics and Dissemination:** This study has received approval from the World Health Organization (WHO/ERC Protocol ID Number ERC.0003778); Ghana Health Service (Protocol ID number GHS-ERC: 027/07/22), the United Republic of Tanzania National Institute for Medical Research (Clearance No. NIMR/HQ/R.8a/Vol.IX/4199), the Medical Research Council of Zimbabwe (Approval number MRCZ/A/2766), and the London School of Hygiene and Tropical Medicine (Approval numbers 26395 and 28312). Issues of consent and disclosure are addressed in the paper.

**Manuscript Wordcount: 5023**

## Background

To unlock human potential and accelerate progress towards achieving the Sustainable Development Goals (SDGs), it is essential to improve the health and wellbeing of adolescents (10-19 years) (Bundy et al., 2018). Health is an essential component of human capital (World Bank, 2019), yet adolescent investments have focused primarily on either health or education services with little attention to synergies between these (Tomlinson et al, 2019). Research investments in the first 1000 days of life have dramatically outweighed investments in the subsequent 7000 days, leaving an evidence gap on how to develop and sustain human potential through adolescence and early adulthood (WHO, 2017).

Among adolescents in low- and middle-income countries (LMICs), HIV/AIDS, road injury, diarrheal diseases, self-harm, iron-deficiency anemia and skin diseases are among the top causes of morbidity and mortality (WHO 2023; WHO, 2019; Kuper et al., 2014). Identifying adolescents with poor health, health-compromising behaviours or undiagnosed disability is important given (1) the growing number of adolescents and their low frequency of regular contacts with health services (Kruk et al., 2022) (2) the high proportion of the total global burden of disease that occurs in adolescence and (3) the fact that many key health conditions (e.g. mental health disorders) and behaviours (e.g. tobacco and alcohol use, unhealthy diet, low physical activity, risky sexual behaviours) that predispose to preventable serious conditions in later life start in adolescence (4) the negative impact of poor health on educational attainment and employability and other transitions to healthy adulthood, and (5) gender-related vulnerabilities, including violence, abuse, unintentional injury, sexual and reproductive health (SRH) and gendered mental health outcomes which may emerge or be exacerbated during this period of life, setting negative trajectories to lifetime and intergenerational health and wellbeing (WHO, 2017).

Systematic reviews have identified individual interventions that are effective at improving various aspects of adolescent health and/or wellbeing (WHO, 2017.) However, most adolescents only come into contact

1  
2  
3 with health services when they are ill, and services are not always appropriate for their needs (WHO,  
4 2015). This represents a missed opportunity for early detection of health problems, for health promotion,  
5  
6 and for the development of health-seeking behaviours. Early and sustained engagement with health and  
7  
8 social services could reap a triple dividend for human development by improving the health and wellbeing  
9  
10 of adolescents, their health and wellbeing in adulthood and the health and wellbeing of their future  
11  
12 offspring (World Bank 2019; WHO 2017; Patton et al., 2016.)  
13  
14  
15

16  
17 Routine health and wellbeing check-up visits for adolescents that screen for multiple conditions and risk  
18  
19 behaviours could provide an entry point into services and be highly cost-effective (Sanci 2011; Harris et  
20  
21 al., 2017). Obtaining evidence on the optimum content, delivery, effectiveness and cost of check-ups is a  
22  
23 high priority for adolescent health research so that governments can be informed by the evidence on how  
24  
25 to initiate or strengthen existing health and wellbeing check-ups during adolescence (Nagata et al., 2018).  
26  
27 Many high-income countries have national recommendations related to adolescent health check-ups,  
28  
29 which have been largely based on expert opinion (Hagan et al., 2008; Hagan et al., 2011; Royal  
30  
31 Australasian College of General Practitioners, 2012). In LMICs, if provided at all, preventive and promotive  
32  
33 health services for adolescents are largely provided in schools and are usually limited to deworming and  
34  
35 vaccination campaigns. They do not usually address other key conditions and risk factors such as nutrition,  
36  
37 mental health, SRH or disability (WHO, 2021a; Baltag and Moran, 2018). If a system-wide approach to  
38  
39 check-ups exists in adolescence, in LMICs it is often limited to a screening activity without other  
40  
41 components such as brief intervention or anticipatory guidance (Baltag and Moran, 2018).  
42  
43  
44  
45  
46

47 This paper describes the protocol for the Y-Check: Evaluating the effects of adolescent health check-ups  
48  
49 study, a prospective hybrid implementation-effectiveness study evaluating the feasibility, acceptability,  
50  
51 short-term effects, costs and cost-effectiveness of the Y-Check intervention in three African cities. This  
52  
53 study has received approval from the World Health Organization (WHO/ERC Protocol ID Number  
54  
55 ERC.0003778); Ghana Health Service (Protocol ID number GHS-ERC: 027/07/22), the United Republic of  
56  
57  
58  
59  
60



1  
2  
3 Tanzania National Institute for Medical Research (Clearance No. NIMR/HQ/R.8a/Vol.IX/4199), the  
4  
5 Medical Research Council of Zimbabwe (Approval number MRCZ/A/2766), and the London School of  
6  
7 Hygiene and Tropical Medicine (Approval numbers 26395 and 28312) .  
8  
9

### 10 **The Y-Check intervention**

11  
12  
13  
14 Y-Check is a novel intervention delivering a health and wellbeing check-up and where indicated will  
15  
16 provide on-the-spot care and/or referral for common conditions on two occasions in adolescence (in  
17  
18 young adolescents (10-14 year-olds) – soon after the onset of puberty - and in older adolescents (15-19  
19  
20 year-olds) – when many adolescents become, or are soon to become, sexually active). It will also provide  
21  
22 health promotion information and materials to support positive behaviours and healthy lifestyles during  
23  
24 adolescence and beyond. The intention is that in the context of a future routinely-delivered programme,  
25  
26 every adolescent will have two guaranteed contacts with the health care system. Adolescents will only be  
27  
28 screened for conditions that have an accurate, low-cost, acceptable screening test and a locally accessible,  
29  
30 effective intervention. The conditions selected for screening will be chosen to reflect the local  
31  
32 epidemiological contexts (e.g. screening for malaria will only take place in malaria endemic areas).  
33  
34 Respecting specific requests from the Ministries of Education in all three cities, the study will only include  
35  
36 sexual and reproductive health screening and services at the community sites (which only include older  
37  
38 adolescents).  
39  
40  
41  
42  
43

44 Figures 1 and 2 present the Theory of Change and description of the intervention. Table 1 applies the  
45  
46 TIDieR checklist (Hoffman et al, 2014) to describe details of the intervention.  
47  
48  
49

50 Locally accessible services will be identified and assessed in terms of their ability to provide the services  
51  
52 recommended by local and WHO guidelines, willingness to accept referred adolescents, and the fees  
53  
54 charged to the project will be negotiated by the research team for services provided to referred  
55  
56  
57  
58  
59  
60

1  
2  
3 adolescents (where adequate services are not covered by national health insurance schemes, free NGO  
4 services or free public health care).  
5  
6

7  
8 The intervention was designed following formative research conducted in three African countries  
9 between 2019 and 2020 (Chingono, Mackworth-Young et al. 2021; Weobong et al. (in preparation);  
10 Sedekia et al (in press)). This formative research revealed that the proposed adolescent health and  
11 wellbeing check-ups are likely to be feasible to implement and acceptable to stakeholders in Ghana,  
12 Tanzania and Zimbabwe, and are likely to meet the perceived needs of key stakeholders including  
13 adolescents, their parents, and key policy makers in the health and education sectors (WHO, 2020).  
14  
15 Further, we showed that the programme is likely to produce a substantial yield of important, previously  
16 untreated, treatable conditions. Human-centered design techniques were used alongside desk review to  
17 define elements of objective and subjective importance to the health and wellbeing of adolescents,  
18 identify facilitators and barriers to adolescent health seeking, preferences for delivery of routine health  
19 check-ups, and potential effects of interventions to select the content and method of delivery of the Y-  
20 Check intervention. Interviews and participatory workshops with adolescents, parents of adolescents and  
21 key stakeholders from the ministries of health and education, non-governmental organizations,  
22 healthcare workers and teachers found that there was overall support for the introduction of routine  
23 health check-ups (Chingono, et al 2021; Weobong et al., in preparation). To navigate potential barriers,  
24 stakeholders suggested clear messaging, awareness building, and sensitization campaigns to overcome  
25 disinterest in preventative healthcare and, in some contexts, mitigate cultural or religious messaging  
26 against healthcare engagement (Chingono, et al 2021).  
27  
28  
29  
30  
31  
32  
33  
34  
35  
36  
37  
38  
39  
40  
41  
42  
43  
44  
45  
46  
47  
48

49 **Insert Figures 1 and 2**  
50  
51  
52  
53  
54  
55  
56  
57  
58  
59  
60

**Table 1: Template for Intervention Description and Replication (TIDieR) checklist describing the Y-Check intervention**

| Item                      | Item                                                                                                                                                                                                                                                                                                                                                                                                                                                                                                                                                                           |
|---------------------------|--------------------------------------------------------------------------------------------------------------------------------------------------------------------------------------------------------------------------------------------------------------------------------------------------------------------------------------------------------------------------------------------------------------------------------------------------------------------------------------------------------------------------------------------------------------------------------|
| <b>Brief name</b>         |                                                                                                                                                                                                                                                                                                                                                                                                                                                                                                                                                                                |
| 1                         | Evaluating the effectiveness of adolescent health check-ups (Y-Check)                                                                                                                                                                                                                                                                                                                                                                                                                                                                                                          |
| <b>Why?</b>               |                                                                                                                                                                                                                                                                                                                                                                                                                                                                                                                                                                                |
| 2                         | Identifying adolescents with poor health, health-compromising behaviours or undiagnosed disability is important for their health and wellbeing, and also for communities and nations<br>Most adolescents only come into contact with health services when they are ill, and services are not always appropriate for their needs<br>Routine health and wellbeing check-up visits for adolescents that screen for multiple preventable and/or treatable conditions and risk behaviours could provide an entry point into services and be highly cost-effective                   |
| <b>What?</b>              |                                                                                                                                                                                                                                                                                                                                                                                                                                                                                                                                                                                |
| 3                         | The intervention includes a comprehensive health check-up for priority conditions customized to national and local contexts.<br>Where indicated, Y-Check will provide on-the-spot care and cover all clinical costs associated with referrals to further care provided by the public health system or non-governmental organizations (NGOs).<br>During the check-up, adolescents will receive health promotion information and limited supplies of key health commodities.<br>Clinical costs of services are covered by the study if accessed within 4 months of the check-up. |
| 4                         | Adolescent-friendly services will be provided, as defined by WHO (2018). Nationally-approved protocols will be applied. Adolescent privacy and confidentiality will be protected.                                                                                                                                                                                                                                                                                                                                                                                              |
| <b>Who provided?</b>      |                                                                                                                                                                                                                                                                                                                                                                                                                                                                                                                                                                                |
| 5                         | Y-Check teams will be staffed with health professionals trained to provide quality adolescent-friendly health services in line with nationally-approved protocols. Y-Check teams will also be trained in the use of the digital application which will be used for data collection. Public and private not-for-profit care facilities providing referrals will meet national accreditation guidelines.                                                                                                                                                                         |
| <b>How?</b>               |                                                                                                                                                                                                                                                                                                                                                                                                                                                                                                                                                                                |
| 6                         | The Y-Check service will take place over a 60-90 minute period face-to-face. Any referrals will only be subsidized by the study if they take place within 4 months.                                                                                                                                                                                                                                                                                                                                                                                                            |
| <b>Where?</b>             |                                                                                                                                                                                                                                                                                                                                                                                                                                                                                                                                                                                |
| 7                         | The Y-Check service will be provided in schools and community venues, in outdoor tents where required.<br>Referrals will be to public or private not-for-profit providers as close as possible to the adolescent's home. Providers will be vetted by the study team as being able to provide the necessary referral services to national and WHO-recommended standards.                                                                                                                                                                                                        |
| <b>When and How Much?</b> |                                                                                                                                                                                                                                                                                                                                                                                                                                                                                                                                                                                |
| 8                         | Within the current phase of the study, each adolescent will receive Y-Check once. Within a routine programme the intention would be that the intervention will be delivered twice during adolescence, once when the adolescent is 10-14 years old, and a second time when they are 15-19 years old.                                                                                                                                                                                                                                                                            |
| <b>Tailoring</b>          |                                                                                                                                                                                                                                                                                                                                                                                                                                                                                                                                                                                |
| 9                         | The content of the intervention is tailored to local context. The exact set of conditions that will be assessed as part of Y-Check will be adapted based on burden of disease, and availability of local tests and referral services.                                                                                                                                                                                                                                                                                                                                          |

| Item                 | Item                                                                                                                                                   |
|----------------------|--------------------------------------------------------------------------------------------------------------------------------------------------------|
| <b>Modifications</b> |                                                                                                                                                        |
| 10                   | Any modifications will be reported in the article reporting the results of the study.                                                                  |
| <b>How well?</b>     |                                                                                                                                                        |
| 11                   | Intervention fidelity (adherence, integrity, quality) will be evaluated through a process evaluation including youth-friendly health services quality. |
| 12                   | Intervention fidelity will be reported in the article reporting the results of the study.                                                              |

## Methods/Design

### Aims

The aim of the study is to develop and implement in three African cities a potentially sustainable adolescent health check-up programme, and evaluate the acceptability, feasibility, short-term effects, and cost-effectiveness of the programme to improve health and wellbeing.

### Objectives

- (1) To develop and pilot test a check-up programme for adolescents that screens for important preventable and treatable health conditions using accurate and acceptable screening tests and provides locally accessible effective interventions.
- (2) Through a prospective intervention study in selected schools and communities to:
  - Estimate short-term impacts on adolescent health and wellbeing outcomes: clinical outcomes, health-related knowledge and behaviours, intentions, agency, and perceived social support for behaviour change; engagement with health services.
  - Understand, through process evaluation, the feasibility and fidelity of implementation, the acceptability and uptake, and the influence of context.

- Estimate the cost-effectiveness of the programme in reducing overall disease burden and improving adolescent wellbeing

- (3) Obtain information on key parameters needed for the planning of an evaluation study: prevalence of health conditions and behaviours, acceptability of referral, feasibility of following-up programme participants and delivering quality follow-up care, initial estimates of the impact of the programme on longer-term health, educational and wellbeing outcomes based on the short-term implementation and effectiveness outcomes observed in this phase of the research programme, and factors related to the optimal implementation of the Y-Check intervention.
- (4) To refine the programme and its theory of change, and finalise optimal methods for the measurement of the impact of the programme in future studies.

### **Theory of Change**

We hypothesise that a routine health and wellbeing check-up visit for adolescents that screens for multiple conditions and risk behaviours will have an immediate and long-term positive impact on health and wellbeing outcomes (Figure 1).

Health seeking and promotion behaviours among adolescents operate in complex environments and across ecological levels (Patton et al., 2016), with determinants at individual, interpersonal institutional/organizational, community and public policy levels. Drawing from the health promotion literature (Green and Kreuter, 1999; McLeroy 1988), the Theory of Change for Y-Check (Figure 1) draws on thinking that recognizes pre-disposing, enabling and reinforcing factors as capacities to be strengthened in order to achieve adolescent wellbeing at the individual level; that responsive parenting can support adolescents to meet their own health and wellbeing goals; that systems-based approaches (including stronger linkages between health and education systems) can improve outcomes for adolescents, especially reaching the most vulnerable and those in need; and that an enabling environment

(especially in schools and communities) can support adolescents to take action towards improving their health.

### Study setting

Our study will be undertaken in three African cities: Cape Coast in Ghana, Mwanza in Tanzania and Chitungwiza in Zimbabwe. These cities are described in Table 1.

**Table 1: The study cities, schools and communities**

| <b>Cape Coast, Ghana</b>                                                                                                                                                                                                                                                                                                                                                                                                                                                                                                                                                                                                                                                                                                                                                                                                                                                                                                                                                                                  | <b>Mwanza, Tanzania</b>                                                                                                                                                                                                                                                                                                                                                                                                                                                                                                                                                                                                                                                                                                                                                                                                                                                                                                                                                                                                                                                                                                                                                               | <b>Chitungwiza, Zimbabwe</b>                                                                                                                                                                                                                                                                                                                                                                                                                                                                                                                                                                                                                                                                                                                                                                                                                                                                                                                                                                                                                                                                                                                                                                                               |
|-----------------------------------------------------------------------------------------------------------------------------------------------------------------------------------------------------------------------------------------------------------------------------------------------------------------------------------------------------------------------------------------------------------------------------------------------------------------------------------------------------------------------------------------------------------------------------------------------------------------------------------------------------------------------------------------------------------------------------------------------------------------------------------------------------------------------------------------------------------------------------------------------------------------------------------------------------------------------------------------------------------|---------------------------------------------------------------------------------------------------------------------------------------------------------------------------------------------------------------------------------------------------------------------------------------------------------------------------------------------------------------------------------------------------------------------------------------------------------------------------------------------------------------------------------------------------------------------------------------------------------------------------------------------------------------------------------------------------------------------------------------------------------------------------------------------------------------------------------------------------------------------------------------------------------------------------------------------------------------------------------------------------------------------------------------------------------------------------------------------------------------------------------------------------------------------------------------|----------------------------------------------------------------------------------------------------------------------------------------------------------------------------------------------------------------------------------------------------------------------------------------------------------------------------------------------------------------------------------------------------------------------------------------------------------------------------------------------------------------------------------------------------------------------------------------------------------------------------------------------------------------------------------------------------------------------------------------------------------------------------------------------------------------------------------------------------------------------------------------------------------------------------------------------------------------------------------------------------------------------------------------------------------------------------------------------------------------------------------------------------------------------------------------------------------------------------|
| <p>Cape Coast Metropolis is located on the coast of Ghana, 150kms west of the capital city, Accra. It has a population of 169,894 with three-quarters of the households residing in urban areas.</p> <p>Literacy in 11-24 year-olds is about 97%. In 2016, 11,233 (68.8%) of 12-14 year-olds were enrolled in junior high schools while 8,407 (91.6%) of 15-17 year-olds were enrolled in senior high schools. For Ghana as a whole, primary and secondary net enrollment rates in 2019 were 86% and 57%, respectively (UNESCO, 2023)</p> <p>There are 36 health facilities (26 public and 10 private) in the metropolitan area, including a regional hospital that serves as a secondary referral facility.</p> <p>The study will be conducted in 8 schools and local community venues in four communities that include two relatively affluent communities with trading being the main source of livelihood and two relatively poorer communities where fishing and farming dominate, respectively.</p> | <p>Mwanza is located on the southern shores of Lake Victoria in North-Western Tanzania and is the second largest city in Tanzania with a population of over 900,000 and an annual growth rate of 3% (Tanzania National Bureau of Statistics, 2016). Economic activities in Mwanza include fishing and fish processing, subsistence agriculture and support services to nearby gold and diamond mines.</p> <p>Adolescents make up 24.2% of the population of the city (Tanzania National Bureau of Statistics, 2016). As of 2020/21, the primary and secondary school net enrollment rates were 82% and 39%, respectively (Tanzania National Bureau of Statistics, 2022)</p> <p>Available public health services include 26 dispensaries, 5 health centres, 2 district hospitals, 1 regional hospital and 1 tertiary/teaching hospital (Tanzania National Bureau of Statistics, 2016; Ilemela Municipal Council, 2017).</p> <p>The study will be conducted in 4–6 purposively-selected communities and in up to 8 primary schools and 8 secondary schools within the catchment area of health facilities serving the selected communities in the two districts within Mwanza city.</p> | <p>Chitungwiza is the third largest city in Zimbabwe, located approximately 25km south of the capital city, Harare. It has a population of about 456,000. The houses are mostly high-density, single-story, detached units with small yards that are generally used for growing vegetables. Most of the people work in Harare, as there is little industry in Chitungwiza itself.</p> <p>Zimbabwe has a school-going population (8-18 years) of approximately 4.3 million (Ministry of Primary and Secondary Education Zimbabwe, 2022). Net primary enrollment rate across Zimbabwe is 94%; net secondary enrollment rate is 54% (ZIMSTAT, 2021)</p> <p>In Chitungwiza, there is one tertiary hospital, 4 public primary healthcare facilities, 20 private medical facilities, 30 government primary schools, and 13 government secondary schools (all mixed sex).</p> <p>The study will be conducted in four distinct communities which are representative of the urban, peri-urban and rural populations of Chitungwiza. Eligible schools must have a student population of at least 200 learners in Grade 6 or at least 75 learners in Form 5; and be located in or close to one of the selected study communities.</p> |

### Study design

In this prospective hybrid implementation-effectiveness study, 2000 adolescents per city who receive the Y-Check intervention will be followed up at 4-months, and at 12-months (Zimbabwe only).

### Stakeholder engagement

1  
2  
3 In each city, the research study is undertaken in partnership with both the national and municipal  
4  
5 Ministries of Health and Education. Each country has a policy framework that provides encouragement  
6  
7 for the introduction of health and nutrition education and promotion among adolescents, including  
8  
9 screening for communicable and non-communicable diseases, immunization, growth monitoring and  
10  
11 assessments and nutritional services (Government of Zimbabwe 2018; Ghana Health Service, 2016;  
12  
13 Government of Tanzania, 2021).  
14  
15

16  
17  
18 This study will build on stakeholder engagement, the process for which was established in each research  
19  
20 setting during the formative phase. In each city, a Community Advisory Committee (CAC) comprising key  
21  
22 community leaders and stakeholders will be reinforced or set up to facilitate input from, and feedback to,  
23  
24 participating communities and a Youth Advisory Group (YAG) will provide a forum for adolescents to input  
25  
26 into the programme. The YAG will meet with research staff at least 4 times per year, be active participants  
27  
28 in programme design and dissemination workshops, and help to ensure that the programme meets the  
29  
30 needs of adolescents. Community engagement will be an ongoing process through regular contacts with  
31  
32 the CAC, the YAG and other stakeholders, such as teachers, health workers, Community Based  
33  
34 Organizations (CBOs), Non-Governmental Organizations (NGOs), and religious leaders. In addition, a key  
35  
36 aspect for building confidence within communities is the knowledge that the study has the support of the  
37  
38 government.  
39  
40  
41  
42

### 43 **Intervention development and pilot testing**

44  
45  
46 Prior to implementation, preparatory activities will include community engagement, participatory co-  
47  
48 design, negotiating referral arrangements and pre-testing of screening tools, procedures and referral  
49  
50 protocols. Pilot studies in each setting will provide initial estimates of the frequency of health and  
51  
52 behavioural outcomes, and help to refine the intervention model.  
53  
54  
55  
56  
57  
58  
59  
60

1  
2  
3 Pilot testing will involve the implementation of the screening tools and procedures with approximately  
4  
5 200 adolescents in each of the three cities with revisions and repeat pilot testing where required. There  
6  
7 will be an opportunity for young people and stakeholders to suggest additional client-centered outcomes  
8  
9 that may reflect some of their priority concerns or intentions that should be captured.  
10  
11  
12

### 13 **Intervention implementation**

14  
15  
16 The intervention will be delivered over a period of 2-6 months in each of the settings. The follow-up visits  
17  
18 will take place at the same school or community setting as the initial check-up. In addition to covering all  
19  
20 clinical costs, the equivalent of USD 5 will be given to each participant who attends the follow-up to cover  
21  
22 any transport costs that they might have incurred. Additionally, health and hygiene related items will also  
23  
24 be provided for adolescents to take home, including tooth cleaning kit (toothbrush and toothpaste), fruit,  
25  
26 bottle of water, two pairs of underpants, pack of reusable sanitary pads (girls only)  
27  
28  
29

### 30 **Composition and training of Y-Check team**

31  
32  
33  
34 The Y-Check team will be trained to deliver adolescent-responsive and age-appropriate services according  
35  
36 to national and WHO guidelines, recognizing also the needs for privacy and confidentiality (WHO, 2015).  
37  
38 This includes providing services that are attractive to adolescents, meet their needs comfortably and  
39  
40 responsively, and that are attentive to their privacy. These principles and approaches will be embedded  
41  
42 into each part of the Y-Check intervention. Visual and auditory privacy will be prioritized, through the use  
43  
44 of separate tents, rooms or screens. Health workers will employ standard gowning and draping for clinical  
45  
46 procedures.  
47  
48  
49

50  
51 For infection prevention and control (IPC), all study procedures including interviews, physical  
52  
53 examinations and blood tests will take place in well-aerated tents or outdoors, and will follow relevant  
54  
55 nationally-approved protocols for all staff and participants.  
56  
57  
58  
59



1  
2  
3 The Y-Check team will be trained in good clinical practice, data protection and confidentiality, and clinical  
4  
5 staff will be trained in counselling for participants testing positive for any of the conditions being screened  
6  
7 for within Y-Check as well as in general counselling skills.  
8  
9

### 10 11 **Inclusion and exclusion criteria** 12

13  
14 To be included in the study, adolescents aged 10-19 years must fall into one of the first three categories  
15  
16 below and fulfil category 4.  
17

18  
19  
20 1) Be attending selected classes of Year 5 of primary school in Mwanza (median age 11 years); Grade 5/6  
21  
22 of primary school in Chitungwiza (median age 11 years); or Year 1 of Junior Secondary School in Cape  
23  
24 Coast (median age 12 years) OR  
25

26  
27  
28 2) Be attending selected classes in Year 3 of Secondary School in Mwanza (median age 17 years), Form  
29  
30 3/4 in Chitungwiza (median age 17 years), or Year 2 of Senior Secondary School in Cape Coast (median  
31  
32 age 16 years) OR  
33

34  
35  
36 3) Be resident in a selected community during the time of the Y-Check intervention, and be aged 16-19  
37  
38 years  
39

40  
41 AND  
42

43  
44  
45 4) Have a completed and signed Informed Consent form, or a signed Informed Assent Form and signed  
46  
47 Parental/Guardian Informed Consent Form if the adolescent is seen in the community and is below the  
48  
49 national age of consent or is seen in a school, irrespective of their age.  
50

### 51 52 **Consent and Assent procedures** 53 54 55 56 57 58 59 60

1  
2  
3 Before the visit of the implementation team, information on the Y-Check programme will be distributed  
4 to parents/guardians through the schools and to community members through an active communication  
5 campaign in collaboration with the CAC and the YAG. School and community meetings will allow parents  
6 and community members to ask questions about the programme and give their feedback.  
7  
8  
9  
10

11  
12  
13 In schools, adolescents will have a short introductory meeting with a member of the Y-Check team  
14 typically in a class or group setting. Parents meetings will then be held in each of the schools, to which all  
15 the parents and guardians of eligible learners will be invited. During these sessions, information will be  
16 provided about the study, its objectives and procedures, possible risks and procedures that will be used  
17 to maintain confidentiality. These meetings will provide an opportunity for the adolescents, parents and  
18 guardians of eligible adolescents to learn more about the Y-Check intervention and the research linked to  
19 it and to have their questions answered.  
20  
21  
22  
23  
24  
25  
26  
27  
28  
29

30 No participants will be screened, receive care or be counselled or interviewed without their informed  
31 consent (community participants who are above the national age of consent), or, for minors, their assent  
32 and parental consent, unless they are determined to be emancipated minors (WHO, 2021b). Following  
33 advice from Ministries of Education in all three countries, all adolescents seen in schools will be considered  
34 to be minors and require parental consent, irrespective of their age.  
35  
36  
37  
38  
39  
40  
41

42 Minor adolescents' assent will be ascertained and documented in an assent form. Parents or guardians  
43 who would like their adolescent to receive the check-up will be asked to provide their written consent.  
44  
45 On the day of the check-up visit, a verbal confirmation of their previous written assent will be requested  
46 from the adolescent. In Ghana and Tanzania, where the minimum age for providing consent to medical  
47 and health-related research is 18 years, clients of all ages under 18 will provide completed parental  
48 consent forms and provide written assent before proceeding through the check-up visit regardless of  
49 whether the check-up is in schools or communities. In Zimbabwe, a waiver of parental consent has been  
50  
51  
52  
53  
54  
55  
56  
57  
58  
59  
60

1  
2  
3 given by the Medical Research Council of Zimbabwe (MRC-Zimbabwe) so that participants aged 16 and 17  
4  
5 years who attend the check-ups in the community venues will be allowed to provide written consent for  
6  
7 themselves.  
8  
9

10  
11 The intervention will be conducted in private and not in the presence of the parent or guardian. Contact  
12  
13 details of the study team will be shared with participants in case they have questions at a later stage. All  
14  
15 participants will be reminded that participation is entirely voluntary and will be told that they can opt out  
16  
17 of the research or services at any time.  
18  
19

## 20 21 **Data collection**

### 22 23 24 *During the Y-Check intervention and follow up*

25  
26 Data collection during baseline and follow-up visits will include self-completed evaluation questionnaires,  
27  
28 self-reported screening tool responses and screening visit consultations, measurements and specimen  
29  
30 collection and an exit interview. Data on the implementation process and on adolescent outcomes will be  
31  
32 collected in digital and paper-based formats. A user-friendly digital data collection app for the check-ups  
33  
34 will be developed and housed on a tablet computer for direct use by the adolescent. Initial sections will  
35  
36 include audio-assisted, user-friendly self-completion questions for adolescents to fill out. This will utilize  
37  
38 engaging content and processes, tailored to adolescents' interests. The option of a face-to-face interview  
39  
40 will also be available if the adolescent is unable to use the tablet or has low literacy level. Health services  
41  
42 registers and school registers will also be reviewed to determine the number of adolescents of the  
43  
44 relevant age ranges, and school attendance by the classes involved in Y-Check. To help build the referral  
45  
46 process, existing adolescent services will be mapped in the study communities.  
47  
48  
49  
50  
51

### 52 53 54 *Process evaluation*

1  
2  
3 The process evaluation is guided by the UK MRC's Process Evaluation framework to understand  
4 intervention implementation (including feasibility and fidelity), mechanisms of impact (including  
5 acceptability and uptake), and the influence of context (Moore et al., 2015). Key implementation  
6 outcomes of interest are acceptability, adoption, appropriateness, feasibility, and fidelity. Data on  
7 contextual factors and barriers and facilitators to programme implementation will be gathered using  
8 routinely-collected programme monitoring data. Qualitative data will be collected through 1)  
9 observations of the Y-Check intervention and referrals, as well as team meetings; 2) in-depth interviews  
10 with eligible adolescents who received, adolescents who were referred, and adolescents who did not  
11 receive Y-Check, as well as with school authorities and the Y-Check service providers; and 3) participatory  
12 workshops with teachers, adolescents, and parents. Quantitative programme monitoring data will be  
13 collected routinely within the Y-Check visit, including through a participant exit interview. Process  
14 evaluation data will be analysed iteratively and thematically, through regular analytical discussions and  
15 analytical memos to draw out the main themes emerging from the data. Across the pilot and intervention  
16 studies, data collection for the process evaluation will include real-time feedback to the implementation  
17 team.

### 36 *Economic evaluation*

37  
38 A costing study will be conducted to estimate the total costs of developing, setting up, and running the Y-  
39 Check package, in school and community settings. A combination of top-down and ingredients-based  
40 costing approaches will be used to generate cost estimates for the whole package, and for each  
41 component/activity. All costs will be estimated from the perspectives of the adolescents, the  
42 schools/community and implementing partners/service providers. Financial and economic costs will be  
43 calculated for all inputs. These inputs will be identified and measured using process data, staff interviews  
44 and observations, document review, and accounting records.

1  
2  
3 Costs will be inputted and analysed in an Excel-based costing tool. The cost analysis will describe the  
4 distribution of costs across different forms of inputs, and will estimate the unit cost per adolescent  
5 reached, screened, and treated on the spot or referred; cost per unit of measure for selected process and  
6 effect outcomes such as cost per condition detected, cost per condition appropriately treated on-the-spot  
7 or with a completed referral within 4 months, cost for a unit improvement in reported quality of life and  
8 Disability Adjusted Life Years (DALYs) averted.  
9  
10  
11  
12  
13  
14  
15

16  
17 The cost and cost-effectiveness estimates will be compared to other programmes in the region (eg. human  
18 papillomavirus vaccination, deworming) and will inform programme replication, scalability, and financial  
19 sustainability.  
20  
21  
22  
23  
24

#### 25 *Data protections*

26  
27 Data protection will be strictly observed. After study completion, data will be stored in the LSHTM-curated  
28 digital repository 'Data Compass' following General Data Protection Regulation (GDPR) guidelines. Data  
29 and code registered in LSHTM Data Compass will be made open access following deposit. A Data Safety  
30 and Monitoring Board (DSMB) has been constituted to assist in managing adverse events, though we  
31 expect these to be very rare since all treatment and care are standard with no novel treatments.  
32  
33  
34  
35  
36  
37  
38  
39

#### 40 **Study outcomes**

41  
42  
43 Outcomes will be ascertained during the check-up screening visit and through collection of referral  
44 vouchers from the referral health facilities, and, for outcomes related to health and wellbeing impacts,  
45 through data from the 4-month and, in Zimbabwe only, 12-month follow-up visits. Outcomes related to  
46 completed referrals will be triangulated against participants' self-reports at the 4-month and. In  
47 Zimbabwe only, 12-month follow-up visits. Review of school and health service registers will be used to  
48 see whether attendance has increased during the period when Y-Check is being implemented.  
49  
50  
51  
52  
53  
54  
55  
56  
57  
58  
59  
60

1  
2  
3 The primary outcome will be the proportion of those screening positive for at least one condition who  
4 receive appropriate on-the-spot care or complete appropriate referral for all identified conditions within  
5  
6  
7 4 months. This will be measured using data collected at the initial check-up visit and through recovery of  
8  
9  
10 referral vouchers given to participants to allow them to access referral services for free during the 4-  
11  
12 months after the Y-Check screening. Completed referral is defined as attending at least the first referral  
13  
14 appointment.  
15

16  
17  
18 Secondary implementation outcomes will include the proportion of those screening positive for each  
19  
20 condition who receive appropriate on-the-spot care or complete appropriate referral for that condition  
21  
22 within 4 months, the yield of previously untreated conditions, clinical outcomes at 4 months among those  
23  
24 who had originally screened positive for each condition, and intervention acceptability, adoption,  
25  
26 appropriateness, feasibility, fidelity and cost. Secondary effectiveness outcomes will include knowledge  
27  
28 about health services and health behaviours, self-reported agency and self-efficacy to make decisions  
29  
30 about their health, self-reported health-related risk and protective behaviours, reported engagement  
31  
32 with health services, wellbeing, self-esteem and quality of life, clinical outcomes, and educational  
33  
34 outcomes, which will be collected within the Y-Check and follow-up visits. The short-term cost-  
35  
36 effectiveness of the intervention will be estimated (calculated by a comparison of the costs of the  
37  
38 intervention against the primary and secondary outcomes and including short-term changes in self-  
39  
40 reported quality of life). All outcomes for the study are described in Table 2.  
41  
42  
43  
44

### 45 **Sample size**

46  
47  
48 In each city, the intervention will be implemented for 10-14 year-olds in up to 6 government primary  
49  
50 schools (N=500 for young adolescent girls, and N=500 for young adolescent boys), and for 15-19 year-olds  
51  
52 in up to 8 secondary schools and up to 3 community venues (N=500 for older adolescent girls, and N=500  
53  
54 for older adolescent boys), giving a total sample size of 2,000 adolescents (10-19y).  
55  
56  
57  
58  
59  
60

The sample size provides specified precision around the primary outcome. For example, for the primary outcome, within each age group and gender, if 150 (30%) of 500 participants screen positive for at least one condition, and 75% of those who screen positive are correctly managed (n=112), the 95% CI for correct management will be +/- 7%.

**Table 2: Study outcomes and means of verification**

| Outcome                                                                                                                                                                                                                                                                                                                                                      | Sources of data                                                                                                                                                                                                                                        |
|--------------------------------------------------------------------------------------------------------------------------------------------------------------------------------------------------------------------------------------------------------------------------------------------------------------------------------------------------------------|--------------------------------------------------------------------------------------------------------------------------------------------------------------------------------------------------------------------------------------------------------|
| <b>Primary outcome</b>                                                                                                                                                                                                                                                                                                                                       |                                                                                                                                                                                                                                                        |
| Proportion of those screening positive for at least one condition who receive appropriate on-the-spot care or complete appropriate referral for all identified conditions within 4 months (i.e. they attend a provider for referral care who has been accredited by the study team and has been shown to be capable of providing appropriate referral care). | <ul style="list-style-type: none"> <li>• Programme monitoring data including records of attendance for referrals</li> <li>• Screening tool (self-reported symptoms or conditions, measurements and clinical actions)</li> </ul>                        |
| <b>Secondary outcomes</b>                                                                                                                                                                                                                                                                                                                                    |                                                                                                                                                                                                                                                        |
| <b>Implementation outcomes</b>                                                                                                                                                                                                                                                                                                                               |                                                                                                                                                                                                                                                        |
| Proportion of those screening positive for each condition who receive appropriate on-the-spot care or complete appropriate referral for that condition within 4 months.                                                                                                                                                                                      | <ul style="list-style-type: none"> <li>• Programme monitoring data including records of attendance for referrals</li> <li>• Screening tool (self-reported symptoms or conditions, measurements, and clinical actions)</li> </ul>                       |
| The yield of previously untreated conditions.                                                                                                                                                                                                                                                                                                                | <ul style="list-style-type: none"> <li>• Programme monitoring data including records of attendance for referrals</li> <li>• Screening tool (self-reported symptoms or conditions, measurements, and clinical actions)</li> </ul>                       |
| Intervention acceptability (satisfaction): acceptability to adolescents and to other stakeholders (eg. schools, parents, health workers).                                                                                                                                                                                                                    | <ul style="list-style-type: none"> <li>• Programme monitoring data including records of attendance for referrals</li> <li>• Screening tool (self-reported symptoms or conditions, measurements, and clinical actions)</li> </ul>                       |
| Intervention adoption (uptake, utilization): Y-Check uptake, referrals completed.                                                                                                                                                                                                                                                                            | <ul style="list-style-type: none"> <li>• Self-completed evaluation questionnaire</li> <li>• Exit interviews</li> </ul>                                                                                                                                 |
| Intervention appropriateness (perceived fit, perceived relevance, perceived usefulness): perceived value of the intervention to adolescents and to other stakeholders.                                                                                                                                                                                       | <ul style="list-style-type: none"> <li>• Observations of the Y-Check visits and of selected referrals</li> <li>• Interviews and workshops with adolescents, healthcare providers, community members, teachers, parents and key stakeholders</li> </ul> |
| Intervention feasibility (actual fit, practicability): Y-Check visits completed, referrals completed, stakeholder support (including community).                                                                                                                                                                                                             | <ul style="list-style-type: none"> <li>• Interviews and workshops with adolescents, healthcare providers,</li> </ul>                                                                                                                                   |
| Intervention fidelity (adherence, integrity, quality): completeness of training for and delivery of intervention                                                                                                                                                                                                                                             | <ul style="list-style-type: none"> <li>• Interviews and workshops with adolescents, healthcare providers,</li> </ul>                                                                                                                                   |

|                                                                                                                                                                                         |                                                                                                                                                                                                                                                                                                                                                                       |
|-----------------------------------------------------------------------------------------------------------------------------------------------------------------------------------------|-----------------------------------------------------------------------------------------------------------------------------------------------------------------------------------------------------------------------------------------------------------------------------------------------------------------------------------------------------------------------|
| components; diagnostic accuracy; youth-friendly health services quality assessment.                                                                                                     | <p>community members, teachers, parents and key stakeholders</p> <ul style="list-style-type: none"> <li>• Observations of the Y-Check visits and of selected referrals, including youth friendly services</li> <li>• Self-reported screening tool</li> </ul>                                                                                                          |
| <b>Economic outcomes</b>                                                                                                                                                                |                                                                                                                                                                                                                                                                                                                                                                       |
| Cost of setting up and running the intervention.                                                                                                                                        | <ul style="list-style-type: none"> <li>• Y-Check documentation and financial records</li> <li>• Interviews with Y-Check staff and staff of the referral facilities.</li> <li>• Programme monitoring data including records of attendance for referrals</li> <li>• Screening tool (self-reported symptoms or conditions, measurements and clinical actions)</li> </ul> |
| Cost per adolescent with a newly diagnosed condition (overall and by condition).                                                                                                        |                                                                                                                                                                                                                                                                                                                                                                       |
| Cost per adolescent with a newly diagnosed condition who received appropriate on-the-spot care or who completed an appropriate referral within 4 months (overall and by condition).     |                                                                                                                                                                                                                                                                                                                                                                       |
| Short-term (4 months) cost-effectiveness: cost per improvement in health or wellbeing (e.g. cost per case addressed or cured), cost per unit improvement in QALYs and per DALY averted. |                                                                                                                                                                                                                                                                                                                                                                       |
| <b>Client outcomes</b>                                                                                                                                                                  |                                                                                                                                                                                                                                                                                                                                                                       |
| Knowledge about health services and health behaviours.                                                                                                                                  | <ul style="list-style-type: none"> <li>• Programme monitoring data including records of attendance for referrals</li> <li>• Screening tool (self-reported symptoms or conditions, measurements and clinical actions)</li> <li>• Self-completed evaluation questionnaire</li> </ul>                                                                                    |
| Intentions to adopt healthy behaviours.                                                                                                                                                 |                                                                                                                                                                                                                                                                                                                                                                       |
| Agency to make decisions about health and wellbeing.                                                                                                                                    |                                                                                                                                                                                                                                                                                                                                                                       |
| Perceived social support for behaviour change.                                                                                                                                          |                                                                                                                                                                                                                                                                                                                                                                       |
| Health-related risk and protective behaviours.                                                                                                                                          |                                                                                                                                                                                                                                                                                                                                                                       |
| Improvement in previously diagnosed health and wellbeing conditions.                                                                                                                    |                                                                                                                                                                                                                                                                                                                                                                       |
| Engagement with health and other services within the past 4 months.                                                                                                                     |                                                                                                                                                                                                                                                                                                                                                                       |
| Self-esteem.                                                                                                                                                                            |                                                                                                                                                                                                                                                                                                                                                                       |
| Self-perceived wellbeing.                                                                                                                                                               |                                                                                                                                                                                                                                                                                                                                                                       |
| Quality of life.                                                                                                                                                                        |                                                                                                                                                                                                                                                                                                                                                                       |
| Clinical outcomes.                                                                                                                                                                      | <ul style="list-style-type: none"> <li>• Self-completed evaluation questionnaire</li> <li>• School register review</li> </ul>                                                                                                                                                                                                                                         |
| Educational outcomes (e.g. school attendance).                                                                                                                                          |                                                                                                                                                                                                                                                                                                                                                                       |
| Client-defined outcomes (to be determined).                                                                                                                                             |                                                                                                                                                                                                                                                                                                                                                                       |

### Statistical analysis

All primary analyses will be conducted separately by study city; Cape Coast, Chitungwiza and Mwanza.

Where comparable, secondary analyses will be conducted with the data from all three cities combined.

In our study sites, a contemporaneous comparison group is not required since no routine screening is currently taking place, and as a result, assessments at baseline will serve as the counterfactual for internal



1  
2  
3 comparisons. Similarly, since there is no routine screening and treatment provided to adolescents of the  
4 target ages in the study population, a before-after comparison is appropriate since it is plausible to assume  
5 that reductions in the prevalence of the chronic conditions between the original Y-Check visit and the  
6 follow-up at four months will be due to the interventions provided through Y-Check.  
7  
8  
9  
10  
11

12  
13 We will follow STROBE guidelines for the reporting of cohort studies. Descriptive analyses will be used to  
14 compare the community-level and school-level characteristics of the study communities and schools.  
15

16  
17 Quantitative programmatic data, including screening test results, services delivered, and referrals made  
18 and completed, will be reported by age, sex, and city. The primary outcome is a single proportion which  
19 will be presented with a 95% confidence interval for each of the 4 target groups: 10–14-year-old males,  
20 10-14 year-old females, 15-19 year-old males, 15-19 year-old females.  
21  
22  
23  
24  
25  
26

27  
28 Secondary outcomes which are measured at a single time point will be presented in a similar way to the  
29 primary outcome. For outcomes which are measured at two or more time points, a before-after analysis  
30 will be conducted comparing differences in measures between the time points. The unit of analysis will  
31 be the individual. For clinical outcomes which are measured at two or more time-points, the initial check-  
32 up visit (baseline) will give the prevalence of untreated conditions which will represent the counterfactual.  
33  
34  
35  
36  
37  
38

39 The prevalence of conditions at the 4-month follow-up visit will be formally compared to this  
40 counterfactual to estimate the short-term effects of the intervention in improving these clinical outcomes.  
41  
42

43 For analysis of outcomes measured at two timepoints we will use mixed effects logistic regression (binary  
44 outcomes) or linear regression (continuous outcomes) adjusting for individual-level clustering as a random  
45 effect and school/community as a fixed effect. Health service and client determinants of correct  
46 management of conditions at 4 months will be analyzed using multivariable regression.  
47  
48  
49  
50  
51  
52

## 53 **Discussion**

54  
55  
56  
57  
58  
59  
60

1  
2  
3 Over the last decade, adolescent wellbeing has become a global priority (WHO, 2023). School health is  
4 also a growing area of policy interest (WHO and UNESCO, 2021). WHO guidelines on school health services  
5 note that along with health promotion, health education, preventive interventions (such as immunizations  
6 and mass drug administration), clinical assessment and health services management, health screenings  
7 within school learners are one of the key pillars in the delivery of comprehensive school health services  
8 (WHO, 2021a). Screening programs such as Y-Check provide a unique opportunity to detect easily  
9 treatable, high-burden health conditions, refer those requiring medical attention, treatment and care, as  
10 well as to advise and encourage adolescents to engage in healthy behaviours.  
11  
12  
13  
14  
15  
16  
17  
18  
19  
20  
21

22 In a 2015 review, school health services were found to exist in at least 102 countries though their content  
23 varied considerably across 16 areas including vaccinations, sexual and reproductive health education,  
24 vision screening, nutrition screening, and nutrition health education (Baltag *et al.* 2015). If all types of  
25 screening were combined, they were the second most commonly reported intervention in school health  
26 services, second only to immunization. A later systematic review found evidence of routine health check-  
27 ups of school age children having been reported in 86 countries worldwide (Baltag and Moran, 2018).  
28 Despite their widespread existence, little quality evidence exists on how to promote good health for  
29 adolescents in educational settings (Baltag *et al.* 2015), and even less for multi-component school health  
30 services (Levinson *et al.* 2019) especially in low- and middle-income countries (Montgomery *et al.* 2021).  
31  
32  
33  
34  
35  
36  
37  
38  
39  
40  
41  
42  
43

44 Good practices in conducting adolescent health or wellbeing screenings are rarely reported. In 2023, WHO  
45 will release new guidance on well-child and well-adolescent visits, which will recommend expanding  
46 routine screening tests to also integrate other wellbeing dimensions through a broader evaluation of  
47 social risks, emotional state, and individual and family resources delivered with context-specific  
48 recommendations at key moments during the first two decades of life. The successful implementation of  
49  
50  
51  
52  
53  
54  
55  
56  
57  
58  
59  
60

1  
2  
3 such guidance requires robust measurement of the effectiveness of preventive interventions in  
4  
5 adolescence (Banati *et al.*, 2023).  
6  
7

8  
9 Evaluation of the Y-Check intervention will incorporate implementation science and effectiveness  
10  
11 research. Such hybrid designs have important advantages over conducting separate studies. These include  
12  
13 the potential for quicker translation of intervention research findings into programmes, the development  
14  
15 and selection of more effective implementation strategies, and more useful information for decision  
16  
17 makers (Curran *et al.* 2012).  
18  
19

20  
21 The process evaluation findings will provide guidance for the next stage of the programme and for  
22  
23 potential future sustainable and scalable implementation by local health authorities should it prove  
24  
25 successful. Data on the short-term changes in clinical and behavioural outcomes will be used as inputs to  
26  
27 model both short-term and long-term health and social impacts and as inputs to sample size and power  
28  
29 calculations for a third phase of the Y-Check research programme, which plans to undertake a rigorous  
30  
31 population level evaluation of the impact of routine check-ups on adolescent health and wellbeing.  
32  
33

34  
35 Through WHO's advice to member states, findings from the Y-Check study have the potential to shape the  
36  
37 delivery of adolescent health check-ups globally including identifying the optimal number, content and  
38  
39 delivery for these services. Y-Check will advance the field by providing some of the first rigorous  
40  
41 information on the effects of a health screening programme in three African cities, assessing  
42  
43 implementation, effectiveness, cost and cost-effectiveness outcomes.  
44  
45  
46  
47

#### 48 **Acknowledgements**

49

50  
51 Programme Advisors include: Prof Simon Gregson, Dr. Sachin Shinde, Prof Fred Binka, Dr. Suzanne Petroni,  
52  
53 Prof. Audrey Pettifor, Prof Shane Norris, Prof. James Hargreaves, Ms. Patience Manhibi, Mr Aveneni  
54  
55  
56  
57  
58  
59  
60

1  
2  
3 Mangome. The DSMB Chair is Professor Fred Binka. DSMB members are Prof. David Mabey, Dr Andrew  
4  
5 Abassa and Dr Nothando Ngwenya.  
6  
7

## 8 **References**

9

10  
11 Baltag, V., Pachyna, A., & Hall, J. (2015). Global overview of school health services: data from 102  
12 countries. *Health Behavior and Policy Review*, 2(4), 268-283.

13  
14 Baltag V, Moran D. Are Routine Health Examinations Fulfilling their Promise for Prevention? *Health*  
15 *Behavior and Policy Review* 2018; 5(6): 22.

16  
17 Banati, P., Banerjee, A., Daelmans, B., & Baltag, V. (2023). The need for new models to measure the  
18 impact of prevention. *Journal of Adolescent Health*, 72(1), 9-11.

19  
20 Bundy DAP, de Silva N, Horton S, Patton GC, Schultz L, Jamison DT. Investment in child and adolescent  
21 health and development: key messages from Disease Control Priorities, 3rd Edition. *Lancet* 2018;  
22 391(10121): 687-99.

23  
24 Chingono RM, Mackworth-Young CRS, Ross DA, Tshuma M, Chiweshe T, Nyamayaro C, Sekanevana C,  
25 Doyle A, Weiss HA, Mangombe A, Madzima B, McHugh G, Ferrand RA. Designing routine health check-  
26 ups for adolescents in Zimbabwe. *J Adolescent Health* 2021;69:940-947.

27  
28 Curran GM, Bauer M, Mittman B, Pyne JM, Stetler C. Effectiveness-implementation hybrid designs:  
29 combining elements of clinical effectiveness and implementation research to enhance public health  
30 impact. *Medical care* 2012; 50(3): 217-26.

31  
32 Damschroder LJ, Aron DC, Keith RE, Kirsh SR, Alexander JA, Lowery JC. Fostering implementation of  
33 health services research findings into practice: a consolidated framework for advancing implementation  
34 science. *Implementation science* : IS 2009; 4: 50.

35  
36 Davis, M., & Fang, A. (2021). Emancipated Minor. In *StatPearls [Internet]*. StatPearls Publishing.

37  
38 Ghana Health Service. Adolescent health service policy and strategy, 2016-2020. Accra, Ghana Health  
39 Service, 2016.

40  
41 Glasgow RE, Vogt TM, Boles SM. Evaluating the public health impact of health promotion interventions:  
42 the RE-AIM framework. *Am J Public Health* 1999; 89(9): 1322-7.

43  
44 Glasgow RE, Harden SM, Gaglio B, et al. RE-AIM Planning and Evaluation Framework: Adapting to New  
45 Science and Practice With a 20-Year Review. *Frontiers in Public Health* 2019; 7: 64.

46  
47 Government of Zimbabwe. Zimbabwe School Health Policy. Harare, Zimbabwe, 2018.

48  
49 Government of Tanzania. Health Sector Strategic Plan July 2021 – June 2026 (HSSP V): Leaving No One  
50 Behind. Ministry of Health, Community Development, Gender, Elderly and Children, Dar es Salaam,  
51 2021.

52  
53 Green, L., & Kreuter, M. (1999). The precede–proceed model. *Health promotion planning: an*  
54 *educational approach*. 3rd ed. Mountain View (CA): Mayfield Publishing Company, 32-43.

Hoffmann, T. C., Glasziou, P. P., Boutron, I., Milne, R., Perera, R., Moher, D., ... & Michie, S. (2014). Better reporting of interventions: template for intervention description and replication (TIDieR) checklist and guide. *Bmj*, 348.

Ilemela Municipal Council. Ilemela Municipal Council Strategic Plan (2016/2021).; 2017.  
doi:10.5089/9781513547442.002

ITU (2020) Young people more connected than the rest of the population

Kruk, M.E., et al., *Improving health and social systems for all children in LMICs: structural innovations to deliver high-quality services*. *Lancet*, 2022. **399** (10337): p. 1830-1844.

Kuper H, Monteath-van Dok A, Wing K, et al. The impact of disability on the lives of children; cross-sectional data including 8,900 children with disabilities and 898,834 children without disabilities across 30 countries. *PLoS One* 2014; 9(9): e107300.

Levinson, J., Kohl, K., Baltag, V., & Ross, D. A. (2019). Investigating the effectiveness of school health services delivered by a health provider: a systematic review of systematic reviews. *PLoS One*, 14(6), e0212603.

McLeroy, K. R., Bibeau, D., Steckler, A., & Glanz, K. (1988). An ecological perspective on health promotion programs. *Health education quarterly*, 15(4), 351-377.

Montgomery P, Knerr W, Ross DA, Patterson J. The effectiveness and acceptability of comprehensive and multicomponent school health services: A systematic review. *J Adolescent Health* 2022;70:192-207.

Moore GF, Audrey S, Barker M, et al. Process evaluation of complex interventions: Medical Research Council guidance. *BMJ* 2015; 350: h1258.

Nagata JM, Hathi S, Ferguson BJ, Hindin MJ, Yoshida S, Ross DA. Research priorities for adolescent health in low- and middle-income countries: A mixed-methods synthesis of two separate exercises. *J Global Health* 2018;**8**(1): doi: 10.7189/jogh.08.010501

National Bureau of Statistics. Mwanza Region - Basic Demographic and Socio-Economic Profile (2012 Census) - National Bureau of Statistics (NBS).; 2016.

Patton, G. C., Sawyer, S. M., Santelli, J. S., Ross, D. A., Afifi, R., Allen, N. B., ... & Viner, R. M. (2016). Our future: a Lancet commission on adolescent health and wellbeing. *The Lancet*, 387(10036), 2423-2478.

Royal Australasian College of General Practitioners. Guidelines for Preventive Activities in General Practice, Volume Spec No. 8th ed. East Melbourne: Royal Australasian College of General Practitioners, 2012.

Sanci L. Clinical preventive services for adolescents: facing the challenge of proving "an ounce of prevention is worth a pound of cure". *J Adolesc Health* 2011; 49(5): 450-2.

Sedekia Y, Mshana G, Nsanya MK, Kohl K, Wambura M, Grosskurth H, Ross DA, Kapiga S. Routine health check-ups for adolescents in Mwanza City, Tanzania: Stakeholders' recommendations on its content, venue, and mode of delivery. Submitted to the BMC Public Health on 7th Nov 2022.

Skivington K, Matthews L, Simpson SA, Craig P, Baird J, Blazeby JM, Boyd KA, Craig N, French DP, McIntosh E, Petticrew M, Rycroft-Malone J, White M, Moore L. A new framework for developing and

1  
2  
3 evaluating complex interventions: update of Medical Research Council guidance. *BMJ*. 2021 Sep  
4 30;374:n2061. doi: 10.1136/bmj.n2061. PMID: 34593508; PMCID: PMC8482308.

6 Tomlinson M, Ross DA, Bahl R, et al. What will it take for children and adolescents to thrive? The Global  
7 Strategy for Women's, Children's, and Adolescents' Health. *The Lancet Child & adolescent health* 2019;  
8 3(4): 208-9.

10 UNESCO (2023) Net enrollment statistics available at <http://uis.unesco.org>. Downloaded March 18  
11 2023

13 Weobong B, Glozah FN, Abdulai HBT, Koka E, Addae N, Alor S, Kohl K, Banati P, Adongo PB, Ross DA.  
14 Reaching adolescents with health services: systematic development of an adolescent health check-ups  
15 programme in Ghana (Y-Check, Ghana). (in preparation).

17 WHO (2012) Making health services adolescent friendly: developing national quality standards for  
18 adolescent friendly health services, 2012.

20 WHO (2014) Health for the World's Adolescents: A second chance in the second decade. Geneva: World  
21 Health Organization 2014.

23 WHO (2015) Global standards for quality health-care services for adolescents: a guide to implement a  
24 standards-driven approach to improve the quality of health care services for adolescents. See more at  
25 <https://apps.who.int/iris/handle/10665/183935>

27  
28 WHO (2017) Global accelerated action for the health of adolescents (AA-HA!): guidance to support  
29 country implementation, 2017.

31 WHO (2019) WHO COVID-19 Case definition. See more at:  
32 [https://www.who.int/publications/i/item/WHO-2019-nCoV-Surveillance\\_Case\\_Definition-2020.2](https://www.who.int/publications/i/item/WHO-2019-nCoV-Surveillance_Case_Definition-2020.2)

33 WHO (2020) Report of Y check Phase 1 to Botnar Foundation.

34  
35 WHO (2020b) Ethical standards for research during public health emergencies: Distilling existing  
36 guidance to support COVID-19 R&D : [https://www.who.int/blueprint/priority-diseases/key-](https://www.who.int/blueprint/priority-diseases/key-action/liverecovery-save-of-ethical-standards-for-research-during-public-health-emergencies.pdf)  
37 [action/liverecovery-save-of-ethical-standards-for-research-during-public-health-emergencies.pdf](https://www.who.int/blueprint/priority-diseases/key-action/liverecovery-save-of-ethical-standards-for-research-during-public-health-emergencies.pdf)

38  
39 WHO (2021a). WHO Guideline on School Health Services. 2021.

40  
41 WHO (2021b). Assessing and supporting adolescents' capacity for autonomous decision-making in  
42 health care settings: a tool for health-care providers. Geneva: World Health Organization

43  
44 WHO (2023). Accelerated Action for the Health of Adolescents (AA-HA! 2.0) Forthcoming. Geneva:  
45 World Health Organization

46  
47 WHO and UNESCO (2021). Making every school a health-promoting school: global standards and  
48 indicators for health-promoting schools and systems Geneva; World Health Organization and UNESCO.

49  
50 World Bank (2019). World Development Report 2019: The Changing Nature of Work. Washington, DC:  
51 World Bank, 2019.

52  
53 World Bank. Gross primary school enrollment (Tanzania). Published 2021.  
54 <https://data.worldbank.org/indicator/SE.PRM.ENRR?locations=TZ>

1  
2  
3 World Bank. Gross secondary school enrollment (Tanzania). Published 2021b.  
4 <https://data.worldbank.org/indicator/SE.SEC.ENRR?locations=TZ>  
5

6 Zimbabwean Ministry of Health and Child Care (MOHCC Z. Implementation Plan for HIV Pre-exposure  
7 Prophylaxis in Zimbabwe, 2018-2020, 2019.  
8

9 Zimbabwe Ministry of Primary and Secondary Education (MoPSE). 2021 Primary and Secondary  
10 Education Statistics Report. Published May 2022.  
11 <http://mopse.co.zw/sites/default/files/public/downloads/EMIS%202021%20Annual%20Education%20Statistics%20Report.pdf>  
12  
13

14 Zimbabwe National Statistics Agency (ZIMSTAT). Education Statistics Report 2018-2020. Published  
15 November 2021. [https://www.zimstat.co.zw/wp-](https://www.zimstat.co.zw/wp-content/uploads/publications/Social/Education/Education_Report_2020.pdf)  
16 [content/uploads/publications/Social/Education/Education\\_Report\\_2020.pdf](https://www.zimstat.co.zw/wp-content/uploads/publications/Social/Education/Education_Report_2020.pdf)  
17  
18  
19  
20  
21  
22  
23  
24  
25  
26  
27  
28  
29  
30  
31  
32  
33  
34  
35  
36  
37  
38  
39  
40  
41  
42  
43  
44  
45  
46  
47  
48  
49  
50  
51  
52  
53  
54  
55  
56  
57  
58  
59  
60

Figure 1: Theory of Change for Y-Check, an adolescent health and wellbeing check-up

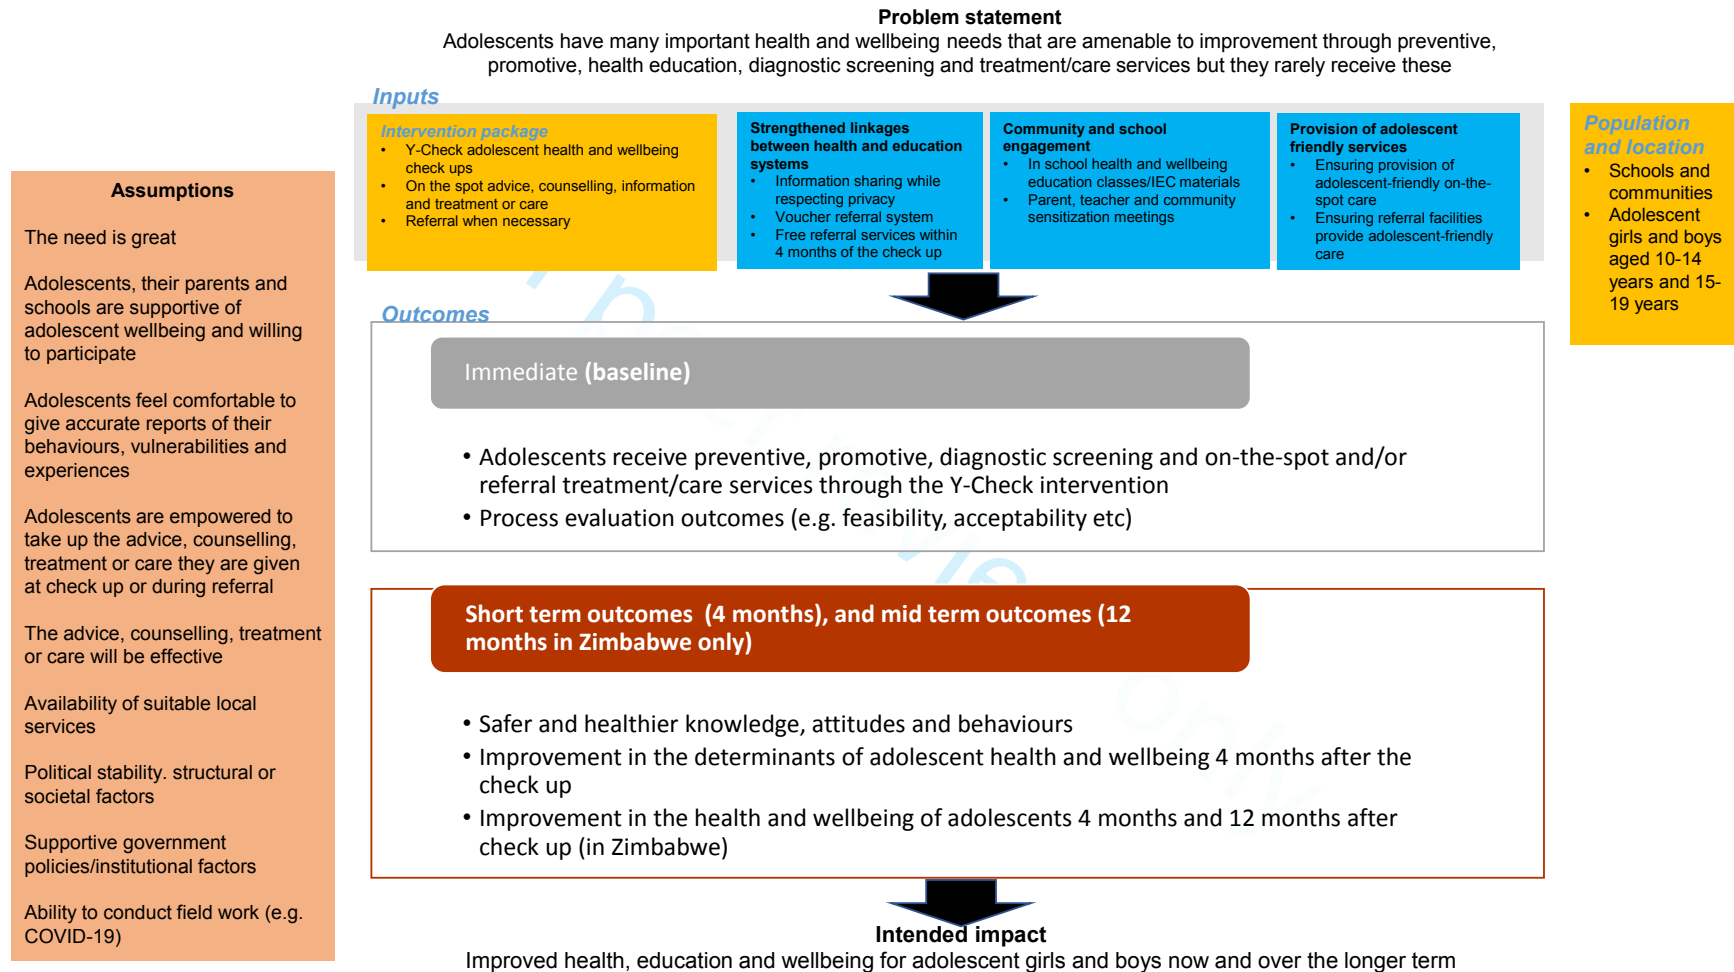



1  
2  
3  
4  
5  
6  
7  
8  
9  
10  
11  
12  
13  
14  
15  
16  
17  
18  
19  
20  
21  
22  
23  
24  
25  
26  
27  
28  
29  
30  
31  
32  
33  
34  
35  
36  
37  
38  
39  
40  
41  
42  
43  
44  
45  
46  
47

Figure 2: The Y-Check Intervention package<sup>1</sup>

### Y-Check screening, on-the-spot care and referral services

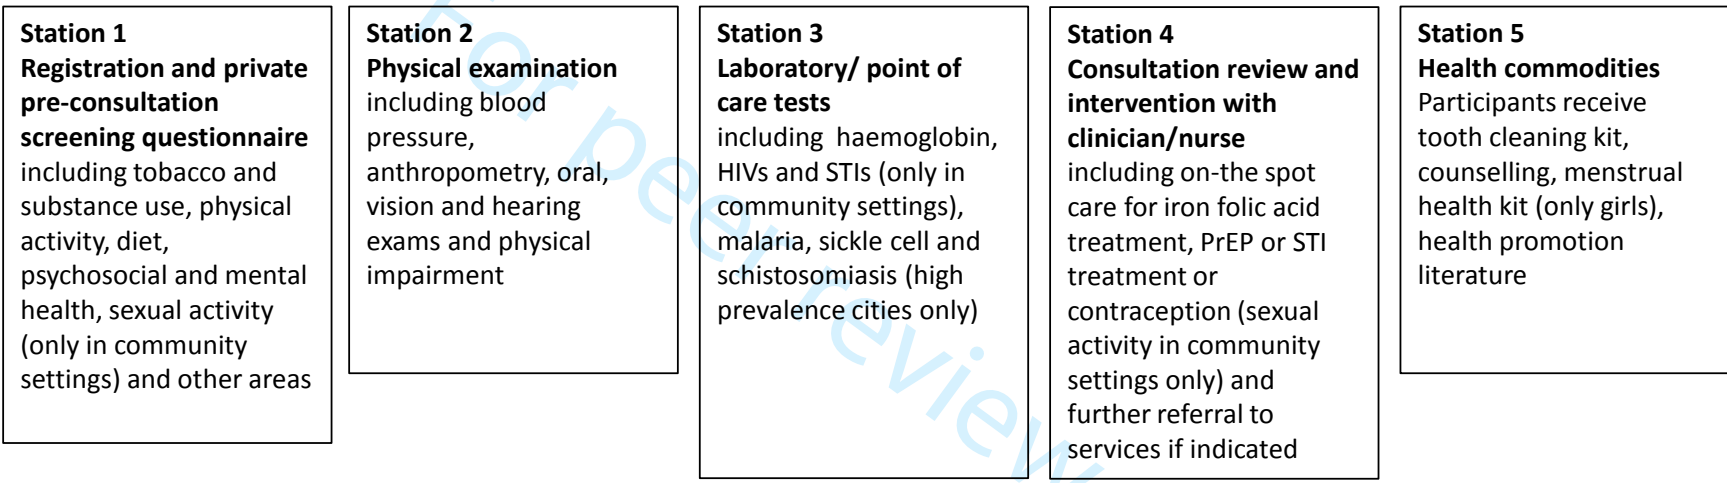

<sup>1</sup> The intervention package may vary according to setting

**Table 1: Template for Intervention Description and Replication (TIDieR) checklist describing the Y-Check intervention**

| Item                      | Item                                                                                                                                                                                                                                                                                                                                                                                                                                                                                                                                                                           |
|---------------------------|--------------------------------------------------------------------------------------------------------------------------------------------------------------------------------------------------------------------------------------------------------------------------------------------------------------------------------------------------------------------------------------------------------------------------------------------------------------------------------------------------------------------------------------------------------------------------------|
| <b>Brief name</b>         |                                                                                                                                                                                                                                                                                                                                                                                                                                                                                                                                                                                |
| 1                         | Evaluating the effectiveness of adolescent health check-ups (Y-Check)                                                                                                                                                                                                                                                                                                                                                                                                                                                                                                          |
| <b>Why?</b>               |                                                                                                                                                                                                                                                                                                                                                                                                                                                                                                                                                                                |
| 2                         | Identifying adolescents with poor health, health-compromising behaviours or undiagnosed disability is important for their health and wellbeing, and also for communities and nations<br>Most adolescents only come into contact with health services when they are ill, and services are not always appropriate for their needs<br>Routine health and wellbeing check-up visits for adolescents that screen for multiple preventable and/or treatable conditions and risk behaviours could provide an entry point into services and be highly cost-effective                   |
| <b>What?</b>              |                                                                                                                                                                                                                                                                                                                                                                                                                                                                                                                                                                                |
| 3                         | The intervention includes a comprehensive health check-up for priority conditions customized to national and local contexts.<br>Where indicated, Y-Check will provide on-the-spot care and cover all clinical costs associated with referrals to further care provided by the public health system or non-governmental organizations (NGOs).<br>During the check-up, adolescents will receive health promotion information and limited supplies of key health commodities.<br>Clinical costs of services are covered by the study if accessed within 4 months of the check-up. |
| 4                         | Adolescent-friendly services will be provided, as defined by WHO (2018). Nationally-approved protocols will be applied. Adolescent privacy and confidentiality will be protected.                                                                                                                                                                                                                                                                                                                                                                                              |
| <b>Who provided?</b>      |                                                                                                                                                                                                                                                                                                                                                                                                                                                                                                                                                                                |
| 5                         | Y-Check teams will be staffed with health professionals trained to provide quality adolescent-friendly health services in line with nationally-approved protocols. Y-Check teams will also be trained in the use of the digital application which will be used for data collection. Public and private not-for-profit care facilities providing referrals will meet national accreditation guidelines.                                                                                                                                                                         |
| <b>How?</b>               |                                                                                                                                                                                                                                                                                                                                                                                                                                                                                                                                                                                |
| 6                         | The Y-Check service will take place over a 60-90 minute period face-to-face. Any referrals will only be subsidized by the study if they take place within 4 months.                                                                                                                                                                                                                                                                                                                                                                                                            |
| <b>Where?</b>             |                                                                                                                                                                                                                                                                                                                                                                                                                                                                                                                                                                                |
| 7                         | The Y-Check service will be provided in schools and community venues, in outdoor tents where required.<br>Referrals will be to public or private not-for-profit providers as close as possible to the adolescent's home. Providers will be vetted by the study team as being able to provide the necessary referral services to national and WHO-recommended standards.                                                                                                                                                                                                        |
| <b>When and How Much?</b> |                                                                                                                                                                                                                                                                                                                                                                                                                                                                                                                                                                                |
| 8                         | Within the current phase of the study, each adolescent will receive Y-Check once. Within a routine programme the intention would be that the intervention will be delivered twice during adolescence, once when the adolescent is 10-14 years old, and a second time when they are 15-19 years old.                                                                                                                                                                                                                                                                            |
| <b>Tailoring</b>          |                                                                                                                                                                                                                                                                                                                                                                                                                                                                                                                                                                                |
| 9                         | The content of the intervention is tailored to local context. The exact set of conditions that will be assessed as part of Y-Check will be adapted based on burden of disease, and availability of local tests and referral services.                                                                                                                                                                                                                                                                                                                                          |
| <b>Modifications</b>      |                                                                                                                                                                                                                                                                                                                                                                                                                                                                                                                                                                                |

1  
2  
3  
4  
5  
6  
7  
8  
9  
10  
11  
12  
13  
14  
15  
16  
17  
18  
19  
20  
21  
22  
23  
24  
25  
26  
27  
28  
29  
30  
31  
32  
33  
34  
35  
36  
37  
38  
39  
40  
41  
42  
43  
44  
45  
46  
47  
48  
49  
50  
51  
52  
53  
54  
55  
56  
57  
58  
59  
60

| Item             | Item                                                                                                                                                   |
|------------------|--------------------------------------------------------------------------------------------------------------------------------------------------------|
| 10               | Any modifications will be reported in the article reporting the results of the study.                                                                  |
| <b>How well?</b> |                                                                                                                                                        |
| 11               | Intervention fidelity (adherence, integrity, quality) will be evaluated through a process evaluation including youth-friendly health services quality. |
| 12               | Intervention fidelity will be reported in the article reporting the results of the study.                                                              |

For peer review only

# BMJ Open

## An adolescent health and wellbeing check-up programme in three African cities (Y-Check): protocol for a multimethod, prospective, hybrid implementation-effectiveness study

|                                 |                                                                                                                                                                                                                                                                                                                                                                                                                                                                                                                                                                                                                                                                                                                                                                                                                                                                                                                                 |
|---------------------------------|---------------------------------------------------------------------------------------------------------------------------------------------------------------------------------------------------------------------------------------------------------------------------------------------------------------------------------------------------------------------------------------------------------------------------------------------------------------------------------------------------------------------------------------------------------------------------------------------------------------------------------------------------------------------------------------------------------------------------------------------------------------------------------------------------------------------------------------------------------------------------------------------------------------------------------|
| Journal:                        | <i>BMJ Open</i>                                                                                                                                                                                                                                                                                                                                                                                                                                                                                                                                                                                                                                                                                                                                                                                                                                                                                                                 |
| Manuscript ID                   | bmjopen-2023-077533.R1                                                                                                                                                                                                                                                                                                                                                                                                                                                                                                                                                                                                                                                                                                                                                                                                                                                                                                          |
| Article Type:                   | Protocol                                                                                                                                                                                                                                                                                                                                                                                                                                                                                                                                                                                                                                                                                                                                                                                                                                                                                                                        |
| Date Submitted by the Author:   | 08-Apr-2024                                                                                                                                                                                                                                                                                                                                                                                                                                                                                                                                                                                                                                                                                                                                                                                                                                                                                                                     |
| Complete List of Authors:       | Banati, Prerna; World Health Organization, Ross, David Anthony; Stellenbosch University Weobong, Benedict; University of Ghana Kapiga, Saidi ; National Institute for Medical Research Mwanza Research Centre; London School of Hygiene & Tropical Medicine Weiss, Helen; London School of Hygiene & Tropical Medicine Baltag , Valentina; World Health Organization Nzvere, Farirai; London School of Hygiene & Tropical Medicine; Biomedical Research and Training Institute Glozah, Franklin; University of Ghana Nsanya, Mussa; National Institute for Medical Research Mwanza Research Centre Greco, Giulia; London School of Hygiene & Tropical Medicine Ferrand, Rashida; London School of Hygiene & Tropical Medicine, Department of Infectious Disease Epidemiology; Biomedical Research and Training Institute Doyle, Aoife; London School of Hygiene & Tropical Medicine; Biomedical Research and Training Institute |
| <b>Primary Subject Heading</b>: | Public health                                                                                                                                                                                                                                                                                                                                                                                                                                                                                                                                                                                                                                                                                                                                                                                                                                                                                                                   |
| Secondary Subject Heading:      | Evidence based practice                                                                                                                                                                                                                                                                                                                                                                                                                                                                                                                                                                                                                                                                                                                                                                                                                                                                                                         |
| Keywords:                       | Adolescent, PUBLIC HEALTH, Mass Screening, Schools                                                                                                                                                                                                                                                                                                                                                                                                                                                                                                                                                                                                                                                                                                                                                                                                                                                                              |
|                                 |                                                                                                                                                                                                                                                                                                                                                                                                                                                                                                                                                                                                                                                                                                                                                                                                                                                                                                                                 |

SCHOLARONE™  
Manuscripts

**An adolescent health and wellbeing check-up programme in three African cities (Y-Check): protocol for a multimethod, prospective, hybrid implementation-effectiveness study**

Banati P, PhD MPH<sup>1\*</sup>, Ross DA, MA, BMBCh, MSc, PhD<sup>2</sup> Weobong B, MSc, PhD<sup>3</sup>, Kapiga S, MD, MPH, ScD<sup>4,5</sup>, Weiss HA PhD MSc<sup>6</sup>, Baltag V MD PhD<sup>1</sup>, Nzvere F<sup>5,7</sup>, Glozah F, MPhil, PhD<sup>3</sup>, Nsanya MK, MD, MSc<sup>4</sup>, Greco G, PhD MSc<sup>5</sup>, Ferrand RA, PhD MBBS<sup>5,7</sup>, and Doyle AM, PhD<sup>6,7</sup> for the Y-Check Research Programme Team<sup>8</sup>

<sup>1</sup> Adolescent and Young Adult Health (AYH) Unit, Maternal, Newborn, Child and Adolescent Health and Ageing (MCA) Department, World Health Organization (WHO), Ave Appia 20, 1211 Geneva 27, Switzerland

<sup>2</sup> Institute for Life Course Health Research, Stellenbosch University, Tygerberg, South Africa

<sup>3</sup> University of Ghana School of Public Health, College of Health Sciences (UGSPH), Ghana

<sup>4</sup> Mwanza Intervention Trials Unit, National Institute for Medical Research Mwanza Research Centre (MITU/NIMR), Isamilo, Mwanza, United Republic of Tanzania

<sup>5</sup> Department of Infectious Disease Epidemiology, London School of Hygiene and Tropical Medicine, Keppel St, London WC1E 7HT, UK

<sup>6</sup> MRC International Statistics and Epidemiology Group, London School of Hygiene & Tropical Medicine, Keppel St, London WC1E 7HT, UK

<sup>7</sup> Biomedical Research and Training Institute (BRTI), 10 Seagrave Road, Avondale, Harare, Zimbabwe

<sup>8</sup> The Y-Check Research Programme Team in alphabetical order includes Prof. Philip B. Adongo, MA, PhD, Department of Social and Behavioural Sciences, School of Public Health, University of Ghana; Mr. Kenneth. S. Adde, MPhil, Department of Population and Health, University of Cape Coast; Prof Evans Agbeno, FGCS, MPH, MBCHB, Department of Obstetrics & Gynaecology, University of Cape Coast; Prof. Patricia Akweongo, MA, PhD, Department of Health Policy Planning and Management, School of Public Health, University of Ghana; Ms Tsitsi Bandason MSc, The Health Research Unit Zimbabwe/ Biomedical Research and Training Institute; Dr. Sarah Bernays, PhD MA, Global Health and Development, London School of Hygiene and Tropical Medicine and School of Public Health, University of Sydney; Dr Rudo Chingono PhD, The Health Research Unit Zimbabwe/ Biomedical Research and Training Institute Dr Chido Dziva Chikwari PhD, MSc, BSc, The Health Research Unit Zimbabwe/ Biomedical Research and Training Institute and MRC International Statistics & Epidemiology Group, Department of Infectious Disease Epidemiology, London School of Hygiene & Tropical Medicine, London, UK; Ms Ethel Dauya MPH, The Health Research Unit Zimbabwe/ Biomedical Research and Training Institute; Dr. S. Derry, PhD, Department of Bio-Statistics, School of Public Health, University of Ghana; Dr. Eric Koka, MPhil, PhD, Department of Sociology and Anthropology, University of Cape Coast; Dr. Constance Mackworth-Young, PhD MSc, Global Health and Development, London School of Hygiene and Tropical Medicine, Ms. Salome Manyau MSc, The Health Research Unit Zimbabwe/ Biomedical Research and Training Institute; Mr. Bernard A. Owusu, MPhil, Department of Population and Health, University of Cape Coast; Dr. Yovitha Sedekia, MPHDC, PhD, Mwanza Intervention Trials Unit (MITU)/National Institute for Medical Research (NIMR); Dr. Hannah Taylor-Abdulai, MPH, MPhil, PhD, Department of Physician Assistant Studies, University of Cape Coast; ; Dr. Mandi Tembo, PhD, The Health Research Unit Zimbabwe/ Biomedical Research and Training Institute and Department of Global Health and Development, Faculty of Public Health and Policy, London School of Hygiene and Tropical Medicine, London, United Kingdom.

\* Corresponding Author

**Email addresses**

Banati P (banatip@who.int); Ross DA (dross.rbridge@gmail.com); Weobong B (bweobong@ug.edu.gh); Kapiga S (Saidi.Kapiga@lshtm.ac.uk); Weiss HA (Helen.Weiss@lshtm.ac.uk); Baltag V (baltagv@who.int); Nzvere F (Farrie.Nzvere@lshtm.ac.uk); Glozah F (fglozah@ug.edu.gh); Nsanya MK (mussa.nsanya@mitu.or.tz); Greco G (Giulia.Greco@lshtm.ac.uk); Ferrand RA (rashida.ferrand@lshtm.ac.uk); Doyle AM (aoife.doyle@lshtm.ac.uk)

1  
2  
3 **48 Article Summary**  
4

5  
6 **49 Abstract**  
7

8  
9 50 Background: During adolescence, behaviours are initiated that will have substantial impacts on the  
10  
11 51 individual's short- and long-term health and wellbeing. However, adolescents rarely have regular contact  
12  
13 52 with health services, and available services are not always appropriate for their needs. We co-developed  
14  
15 53 with adolescents a health and wellbeing check-up programme (Y-Check). This paper describes the  
16  
17 54 methods to evaluate the feasibility, acceptability, short-term effects, and cost-effectiveness of Y-Check in  
18  
19 55 three African cities.  
20  
21

22  
23 56 Method: This is a multi-country prospective intervention study, with a mixed-method process evaluation.  
24

25 57 The intervention involves screening, on-the-spot care and referral of adolescents through health and  
26

27 58 wellbeing check-up visits. In each city, 2000 adolescents will be recruited in schools or community venues.  
28

29 59 Adolescents will be followed-up at 4 months. The study will assess the effects of Y-Check on knowledge  
30

31 60 and behaviours, as well as clinical outcomes and costs. Process and economic evaluations will investigate  
32

33  
34 61 acceptability, feasibility, uptake, fidelity and cost effectiveness.  
35  
36

37 62 Ethics and Dissemination: Approval has been received from the WHO (WHO/ERC Protocol ID Number  
38

39 63 ERC.0003778); Ghana Health Service (Protocol ID number GHS-ERC: 027/07/22), the United Republic of  
40

41 64 Tanzania National Institute for Medical Research (Clearance No. NIMR/HQ/R.8a/Vol.IX/4199), the Medical  
42

43 65 Research Council of Zimbabwe (Approval number MRCZ/A/2766), and the LSHTM (Approval numbers  
44

45 66 26395 and 28312). The trial registration number is NCT06090006. Consent and disclosure are addressed  
46  
47

48 67 in the paper. Results will be published in 3 country-specific peer reviewed journal publications, and one  
49

50 68 multi-country publication; and disseminated through videos, briefs, and webinars. Data will be placed into  
51

52 69 an open access repository. Data will be deidentified and anonymized.  
53  
54  
55  
56  
57

1  
2  
3  
4  
5  
6  
7  
8  
9  
10  
11  
12  
13  
14  
15  
16  
17  
18  
19  
20  
21  
22  
23  
24  
25  
26  
27  
28  
29  
30  
31  
32  
33  
34  
35  
36  
37  
38  
39  
40  
41  
42  
43  
44  
45  
46  
47  
48  
49  
50  
51  
52  
53  
54  
55  
56  
57  
58  
59  
60

70 Discussion: This study is innovative in evaluating a comprehensive adolescent health and wellbeing check-  
71 up intervention which addresses both health conditions that impact on wellbeing during adolescence, and  
72 risk factors for future health or wellbeing. Findings will support larger scale intervention implementation  
73 and longer-term evaluation.

74  
75 **Keywords:** Adolescent, health, wellbeing, check-ups, screening, implementation research, effectiveness,  
76 cost-effectiveness

77

For peer review only

1  
2  
3 78 **Additional information**  
4

5 79 **Strengths and limitations of the methodology:**  
6

- 7 80 • **Strength:** This study will utilize existing health care infrastructure in low- and middle-income  
8 81 country settings, assessing real world implementation situations and therefore it will be  
9 82 relatively straightforward to directly apply the findings to programs.  
10  
11 83 • **Strength:** This is a relatively large study of 6000 adolescents in 3 countries. The study takes the  
12 84 views of young people centrally into the design of the intervention.  
13 85 • **Limitation:** Although the primary outcome is an implementation science / programmatic  
14 86 outcome, the effectiveness data is based on pre-post comparison.  
15 87 • **Limitation:** This study will have limited ability to assess sustainability of effects over the longer  
16 88 term as the follow up period is 4 months  
17 89 • **Limitation:** This study is operating in three African cities which may limit generalizability to rural  
18 89 areas.  
19 90  
20 91  
21  
22 92  
23 93  
24 94  
25  
26 95  
27  
28  
29  
30  
31  
32  
33  
34  
35  
36  
37  
38  
39  
40  
41  
42  
43  
44  
45  
46  
47  
48  
49  
50  
51  
52  
53  
54  
55  
56  
57  
58  
59  
60

**Manuscript Wordcount: 5023**



## 96 **Background**

97 To unlock human potential and accelerate progress towards achieving the Sustainable Development Goals  
98 (SDGs), it is essential to improve the health and wellbeing of adolescents (10-19 years) (1). Health is an  
99 essential component of human capital (2), yet adolescent investments have focused primarily on either  
100 health or education services with little attention to synergies between these (3). Research investments in  
101 the first 1000 days of life have dramatically outweighed investments in the subsequent 7000 days, leaving  
102 an evidence gap on how to develop and sustain human potential through adolescence and early  
103 adulthood (4).

104 Among adolescents in low- and middle-income countries (LMICs), HIV/AIDS, road injury, diarrheal  
105 diseases, self-harm, iron-deficiency anemia and skin diseases are among the top causes of morbidity and  
106 mortality (5, 6, 7). Identifying adolescents with poor health, health-compromising behaviours or  
107 undiagnosed disability is important given (a) the growing number of adolescents and their low frequency  
108 of regular contacts with health services (8) (b) the high proportion of the total global burden of disease  
109 that occurs in adolescence and (c) the fact that many key health conditions (e.g. mental health disorders)  
110 and behaviours (e.g. tobacco and alcohol use, unhealthy diet, low physical activity, risky sexual  
111 behaviours) that predispose to preventable serious conditions in later life start in adolescence (d) the  
112 negative impact of poor health on educational attainment and employability and other transitions to  
113 healthy adulthood, and (e) gender-related vulnerabilities, including violence, abuse, unintentional injury,  
114 sexual and reproductive health (SRH) and gendered mental health outcomes which may emerge or be  
115 exacerbated during this period of life, setting negative trajectories to lifetime and intergenerational health  
116 and wellbeing (4).

117 Systematic reviews have identified individual interventions that are effective at improving various aspects  
118 of adolescent health and/or wellbeing (4) However, most adolescents only come into contact with health

1  
2  
3 119 services when they are ill, and services are not always appropriate for their needs (9). This represents a  
4  
5 120 missed opportunity for early detection of health problems, for health promotion, and for the development  
6  
7 121 of health-seeking behaviours. Early and sustained engagement with health and social services could reap  
8  
9 122 a triple dividend for human development by improving the health and wellbeing of adolescents, their  
10  
11 123 health and wellbeing in adulthood and the health and wellbeing of their future offspring (2, 4, 10)

12  
13  
14  
15 124 Routine health and wellbeing check-up visits for adolescents that screen for multiple conditions and risk  
16  
17 125 behaviours could provide an entry point into services and be highly cost-effective (11, 12). Obtaining  
18  
19 126 evidence on the optimum content, delivery, effectiveness and cost of check-ups is a high priority for  
20  
21 127 adolescent health research so that governments can be informed by the evidence on how to initiate or  
22  
23 128 strengthen existing health and wellbeing check-ups during adolescence (13). Many high-income countries  
24  
25 129 have national recommendations related to adolescent health check-ups, which have been largely based  
26  
27 130 on expert opinion (14,15). In LMICs, if provided at all, preventive and promotive health services for  
28  
29 131 adolescents are largely provided in schools and are usually limited to deworming and vaccination  
30  
31 132 campaigns. They do not usually address other key conditions and risk factors such as nutrition, mental  
32  
33 133 health, SRH or disability (16, 17). If a system-wide approach to check-ups exists in adolescence, in LMICs  
34  
35 134 it is often limited to a screening activity without other components such as brief intervention or  
36  
37 135 anticipatory guidance (17).

38  
39  
40  
41  
42 136 This paper describes the protocol for the Y-Check: Evaluating the effects of adolescent health check-ups  
43  
44 137 study, a prospective hybrid implementation-effectiveness study evaluating the feasibility, acceptability,  
45  
46 138 short-term effects, costs and cost-effectiveness of the Y-Check intervention in three African cities. This  
47  
48 139 study has received approval from the World Health Organization (WHO/ERC Protocol ID Number  
49  
50 140 ERC.0003778); Ghana Health Service (Protocol ID number GHS-ERC: 027/07/22), the United Republic of  
51  
52 141 Tanzania National Institute for Medical Research (Clearance No. NIMR/HQ/R.8a/Vol.IX/4199), the  
53  
54  
55  
56  
57  
58  
59  
60

1  
2  
3 142 Medical Research Council of Zimbabwe (Approval number MRCZ/A/2766), and the London School of  
4  
5 143 Hygiene and Tropical Medicine (Approval numbers 26395 and 28312) .  
6  
7

8 144 **The Y-Check intervention**  
9

10  
11 145 Y-Check is a novel intervention delivering a health and wellbeing check-up and where indicated will  
12  
13 146 provide on-the-spot care and/or referral for common conditions on two occasions in adolescence (in  
14  
15 147 young adolescents (10-14 year-olds) – soon after the onset of puberty - and in older adolescents (15-19  
16  
17 148 year-olds) – when many adolescents become, or are soon to become, sexually active). It will also provide  
18  
19 149 health promotion information and materials to support positive behaviours and healthy lifestyles during  
20  
21 150 adolescence and beyond. The intention is that in the context of a future routinely-delivered programme,  
22  
23 151 every adolescent will have two guaranteed contacts with the health care system. Adolescents will only be  
24  
25 152 screened for conditions that have an accurate, low-cost, acceptable screening test and a locally accessible,  
26  
27 153 effective intervention. The conditions selected for screening will be chosen to reflect the local  
28  
29 154 epidemiological contexts (e.g. screening for malaria will only take place in malaria endemic areas).  
30  
31 155 Respecting specific requests from the Ministries of Education in all three cities, the study will only include  
32  
33 156 sexual and reproductive health (SRH) screening and services at the community sites (which only include  
34  
35 157 older adolescents).  
36  
37  
38  
39  
40  
41

42 158 Figures 1 and 2 present the Theory of Change and description of the intervention. Table 1 applies the  
43  
44 159 TIDieR checklist (18) to describe details of the intervention.  
45  
46

47 160 Locally accessible services will be identified and assessed in terms of their ability to provide the services  
48  
49 161 recommended by local and WHO guidelines, willingness to accept referred adolescents, and the fees  
50  
51 162 charged to the project will be negotiated by the research team for services provided to referred  
52  
53  
54  
55  
56  
57  
58  
59  
60

1  
2  
3 163 adolescents (where adequate services are not covered by national health insurance schemes, free NGO  
4  
5 164 services or free public health care).  
6  
7

8  
9 165 **Insert Figures 1 and 2**  
10  
11  
12  
13  
14  
15  
16  
17  
18  
19  
20  
21  
22  
23  
24  
25  
26  
27  
28  
29  
30  
31  
32  
33  
34  
35  
36  
37  
38  
39  
40  
41  
42  
43  
44  
45  
46  
47  
48  
49  
50  
51  
52  
53  
54  
55  
56  
57

For peer review only

166 **Table 1: Template for Intervention Description and Replication (TIDieR) checklist describing the Y-Check**  
 167 **intervention**

| Item                      | Item                                                                                                                                                                                                                                                                                                                                                                                                                                                                                                                                                                           |
|---------------------------|--------------------------------------------------------------------------------------------------------------------------------------------------------------------------------------------------------------------------------------------------------------------------------------------------------------------------------------------------------------------------------------------------------------------------------------------------------------------------------------------------------------------------------------------------------------------------------|
| <b>Brief name</b>         |                                                                                                                                                                                                                                                                                                                                                                                                                                                                                                                                                                                |
| 1                         | Evaluating the effectiveness of adolescent health check-ups (Y-Check)                                                                                                                                                                                                                                                                                                                                                                                                                                                                                                          |
| <b>Why?</b>               |                                                                                                                                                                                                                                                                                                                                                                                                                                                                                                                                                                                |
| 2                         | Identifying adolescents with poor health, health-compromising behaviours or undiagnosed disability is important for their health and wellbeing, and also for communities and nations<br>Most adolescents only come into contact with health services when they are ill, and services are not always appropriate for their needs<br>Routine health and wellbeing check-up visits for adolescents that screen for multiple preventable and/or treatable conditions and risk behaviours could provide an entry point into services and be highly cost-effective                   |
| <b>What?</b>              |                                                                                                                                                                                                                                                                                                                                                                                                                                                                                                                                                                                |
| 3                         | The intervention includes a comprehensive health check-up for priority conditions customized to national and local contexts.<br>Where indicated, Y-Check will provide on-the-spot care and cover all clinical costs associated with referrals to further care provided by the public health system or non-governmental organizations (NGOs).<br>During the check-up, adolescents will receive health promotion information and limited supplies of key health commodities.<br>Clinical costs of services are covered by the study if accessed within 4 months of the check-up. |
| 4                         | Adolescent-friendly services will be provided, as defined by WHO (2018). Nationally-approved protocols will be applied. Adolescent privacy and confidentiality will be protected.                                                                                                                                                                                                                                                                                                                                                                                              |
| <b>Who provided?</b>      |                                                                                                                                                                                                                                                                                                                                                                                                                                                                                                                                                                                |
| 5                         | Y-Check teams will be staffed with health professionals trained to provide quality adolescent-friendly health services in line with nationally-approved protocols. Y-Check teams will also be trained in the use of the digital application which will be used for data collection. Public and private not-for-profit care facilities providing referrals will meet national accreditation guidelines.                                                                                                                                                                         |
| <b>How?</b>               |                                                                                                                                                                                                                                                                                                                                                                                                                                                                                                                                                                                |
| 6                         | The Y-Check service will take place over a 60-90 minute period face-to-face. Any referrals will only be subsidized by the study if they take place within 4 months.                                                                                                                                                                                                                                                                                                                                                                                                            |
| <b>Where?</b>             |                                                                                                                                                                                                                                                                                                                                                                                                                                                                                                                                                                                |
| 7                         | The Y-Check service will be provided in schools and community venues, in outdoor tents where required.<br>Referrals will be to public or private not-for-profit providers as close as possible to the adolescent's home. Providers will be vetted by the study team as being able to provide the necessary referral services to national and WHO-recommended standards.                                                                                                                                                                                                        |
| <b>When and How Much?</b> |                                                                                                                                                                                                                                                                                                                                                                                                                                                                                                                                                                                |
| 8                         | Within the current phase of the study, each adolescent will receive Y-Check once. Within a routine programme the intention would be that the intervention will be delivered twice during adolescence, once when the adolescent is 10-14 years old, and a second time when they are 15-19 years old.                                                                                                                                                                                                                                                                            |
| <b>Tailoring</b>          |                                                                                                                                                                                                                                                                                                                                                                                                                                                                                                                                                                                |
| 9                         | The content of the intervention is tailored to local context. The exact set of conditions that will be assessed as part of Y-Check will be adapted based on burden of disease, and availability of local tests and referral services.                                                                                                                                                                                                                                                                                                                                          |
| <b>Modifications</b>      |                                                                                                                                                                                                                                                                                                                                                                                                                                                                                                                                                                                |

| Item             | Item                                                                                                                                                   |
|------------------|--------------------------------------------------------------------------------------------------------------------------------------------------------|
| 10               | Any modifications will be reported in the article reporting the results of the study.                                                                  |
| <b>How well?</b> |                                                                                                                                                        |
| 11               | Intervention fidelity (adherence, integrity, quality) will be evaluated through a process evaluation including youth-friendly health services quality. |
| 12               | Intervention fidelity will be reported in the article reporting the results of the study.                                                              |

168

## 169 **Methods/Design**

### 170 **Aims**

171 The aim of the study is to develop and implement in three African cities a potentially sustainable  
 172 adolescent health check-up programme, and evaluate the acceptability, feasibility, short-term effects,  
 173 and cost-effectiveness of the programme to improve health and wellbeing. The study was launched in  
 174 September 2021 and will run until June 2025.

### 175 **Objectives**

176 (1) To develop and pilot test a check-up programme for adolescents that screens for important  
 177 preventable and treatable health conditions using accurate and acceptable screening tests and  
 178 provides locally accessible effective interventions.

179 (2) Through a prospective intervention study in selected schools and communities to:

- 180 • Estimate short-term impacts on adolescent health and wellbeing outcomes: clinical  
 181 outcomes, health-related knowledge and behaviours, intentions, agency, and perceived social  
 182 support for behaviour change; engagement with health services.
- 183 • Understand, through process evaluation, the feasibility and fidelity of implementation, the  
 184 acceptability and uptake, and the influence of context.

- 1  
2  
3 185           • Estimate the cost-effectiveness of the programme in reducing overall disease burden and  
4  
5 186           improving adolescent wellbeing  
6  
7  
8 187       (3) Obtain information on key parameters needed for the planning of an evaluation study: prevalence  
9  
10 188       of health conditions and behaviours, acceptability of referral, feasibility of following-up  
11  
12 189       programme participants and delivering quality follow-up care, initial estimates of the impact of  
13  
14 190       the programme on longer-term health, educational and wellbeing outcomes based on the short-  
15  
16 191       term implementation and effectiveness outcomes observed in this phase of the research  
17  
18 192       programme, and factors related to the optimal implementation of the Y-Check intervention.  
19  
20  
21 193       (4) To refine the programme and its theory of change, and finalise optimal methods for the  
22  
23 194       measurement of the impact of the programme in future studies.  
24  
25  
26

## 27 195 **Patient and public involvement**

28  
29  
30 196 The intervention was designed following formative research conducted in three African countries  
31  
32 197 between 2019 and 2020 (19, 20, 21). This formative research revealed that the proposed adolescent  
33  
34 198 health and wellbeing check-ups are likely to be feasible to implement and acceptable to stakeholders in  
35  
36 199 Ghana, Tanzania and Zimbabwe, and are likely to meet the perceived needs of key stakeholders including  
37  
38 200 adolescents, their parents, and key policy makers in the health and education sectors (22). Further, we  
39  
40 201 showed that the programme is likely to produce a substantial yield of important, previously untreated,  
41  
42 202 treatable conditions. Human-centered design techniques were used alongside desk review to define  
43  
44 203 elements of objective and subjective importance to the health and wellbeing of adolescents, identify  
45  
46 204 facilitators and barriers to adolescent health seeking, preferences for delivery of routine health check-  
47  
48 205 ups, and potential effects of interventions to select the content and method of delivery of the Y-Check  
49  
50 206 intervention. Interviews and participatory workshops with adolescents, parents of adolescents and key  
51  
52 207 stakeholders from the ministries of health and education, non-governmental organizations, healthcare  
53  
54  
55  
56  
57  
58  
59  
60

1  
2  
3 208 workers and teachers found that there was overall support for the introduction of routine health check-  
4  
5 209 ups (19, 20, 21). To navigate potential barriers, stakeholders suggested clear messaging, awareness  
6  
7 210 building, and sensitization campaigns to overcome disinterest in preventative healthcare and, in some  
8  
9 211 contexts, mitigate cultural or religious messaging against healthcare engagement (19).

### 212 **Theory of Change**

15 213 We hypothesise that a routine health and wellbeing check-up visit for adolescents that screens for  
16  
17 214 multiple conditions and risk behaviours will have an immediate and long-term positive impact on health  
18  
19 215 and wellbeing outcomes (Figure 1).

22 216 Health seeking and promotion behaviours among adolescents operate in complex environments and  
23  
24 217 across ecological levels (10), with determinants at individual, interpersonal institutional/organizational,  
25  
26 218 community and public policy levels. Drawing from the health promotion literature (23, 24), the Theory of  
27  
28 219 Change for Y-Check (Figure 1) draws on thinking that recognizes pre-disposing, enabling and reinforcing  
29  
30 220 factors as capacities to be strengthened in order to achieve adolescent wellbeing at the individual level;  
31  
32 221 that responsive parenting can support adolescents to meet their own health and wellbeing goals; that  
33  
34 222 systems-based approaches (including stronger linkages between health and education systems) can  
35  
36 223 improve outcomes for adolescents, especially reaching the most vulnerable and those in need; and that  
37  
38 224 an enabling environment (especially in schools and communities) can support adolescents to take action  
39  
40 225 towards improving their health.

### 45 226 **Study setting**

48 227 Our study will be undertaken in three African cities: Cape Coast in Ghana, Mwanza in Tanzania and  
49  
50 228 Chitungwiza in Zimbabwe. These cities are described in Table 1.

53 229  
54 230  
55 231



232 **Table 1: The study cities, schools and communities**

| <b>Cape Coast, Ghana</b>                                                                                                                                                                                                                                                                                                                                                                                                                                                                                                                                                                                                                                                                                                                                                                                                                                                                                                                                                                        | <b>Mwanza, Tanzania</b>                                                                                                                                                                                                                                                                                                                                                                                                                                                                                                                                                                                                                                                                                                                                                                                                                                                                                                                                                                                                    | <b>Chitungwiza, Zimbabwe</b>                                                                                                                                                                                                                                                                                                                                                                                                                                                                                                                                                                                                                                                                                                                                                                                                                                                                                                                                                                                                                                                                                                                                 |
|-------------------------------------------------------------------------------------------------------------------------------------------------------------------------------------------------------------------------------------------------------------------------------------------------------------------------------------------------------------------------------------------------------------------------------------------------------------------------------------------------------------------------------------------------------------------------------------------------------------------------------------------------------------------------------------------------------------------------------------------------------------------------------------------------------------------------------------------------------------------------------------------------------------------------------------------------------------------------------------------------|----------------------------------------------------------------------------------------------------------------------------------------------------------------------------------------------------------------------------------------------------------------------------------------------------------------------------------------------------------------------------------------------------------------------------------------------------------------------------------------------------------------------------------------------------------------------------------------------------------------------------------------------------------------------------------------------------------------------------------------------------------------------------------------------------------------------------------------------------------------------------------------------------------------------------------------------------------------------------------------------------------------------------|--------------------------------------------------------------------------------------------------------------------------------------------------------------------------------------------------------------------------------------------------------------------------------------------------------------------------------------------------------------------------------------------------------------------------------------------------------------------------------------------------------------------------------------------------------------------------------------------------------------------------------------------------------------------------------------------------------------------------------------------------------------------------------------------------------------------------------------------------------------------------------------------------------------------------------------------------------------------------------------------------------------------------------------------------------------------------------------------------------------------------------------------------------------|
| <p>Cape Coast Metropolis is located on the coast of Ghana, 150kms west of the capital city, Accra. It has a population of 169,894 with three-quarters of the households residing in urban areas.</p> <p>Literacy in 11-24 year-olds is about 97%. In 2016, 11,233 (68.8%) of 12-14 year-olds were enrolled in junior high schools while 8,407 (91.6%) of 15-17 year-olds were enrolled in senior high schools. For Ghana as a whole, primary and secondary net enrollment rates in 2019 were 86% and 57%, respectively (25)</p> <p>There are 36 health facilities (26 public and 10 private) in the metropolitan area, including a regional hospital that serves as a secondary referral facility.</p> <p>The study will be conducted in 8 schools and local community venues in four communities that include two relatively affluent communities with trading being the main source of livelihood and two relatively poorer communities where fishing and farming dominate, respectively.</p> | <p>Mwanza is located on the southern shores of Lake Victoria in North-Western Tanzania and is the second largest city in Tanzania with a population of over 900,000 and an annual growth rate of 3% (26). Economic activities in Mwanza include fishing and fish processing, subsistence agriculture and support services to nearby gold and diamond mines.</p> <p>Adolescents make up 24.2% of the population of the city (Tanzania National Bureau of Statistics, 2016). As of 2020/21, the primary and secondary school net enrollment rates were 82% and 39%, respectively (26)</p> <p>Available public health services include 26 dispensaries, 5 health centres, 2 district hospitals, 1 regional hospital and 1 tertiary/teaching hospital (26, 27).</p> <p>The study will be conducted in 4–6 purposively-selected communities and in up to 8 primary schools and 8 secondary schools within the catchment area of health facilities serving the selected communities in the two districts within Mwanza city.</p> | <p>Chitungwiza is the third largest city in Zimbabwe, located approximately 25km south of the capital city, Harare. It has a population of about 456,000 (28). The houses are mostly high-density, single-story, detached units with small yards that are generally used for growing vegetables. Most of the people work in Harare, as there is little industry in Chitungwiza itself.</p> <p>Zimbabwe has a school-going population (8-18 years) of approximately 4.3 million (29). Net primary enrollment rate across Zimbabwe is 94%; net secondary enrollment rate is 54% (28)</p> <p>In Chitungwiza, there is one tertiary hospital, 4 public primary healthcare facilities, 20 private medical facilities, 30 government primary schools, and 13 government secondary schools (all mixed sex).</p> <p>The study will be conducted in four distinct communities which are representative of the urban, peri-urban and rural populations of Chitungwiza. Eligible schools must have a student population of at least 200 learners in Grade 6 or at least 75 learners in Form 5; and be located in or close to one of the selected study communities.</p> |

234 **Study design**

235 In this prospective hybrid implementation-effectiveness study, 2000 adolescents per city who receive the

236 Y-Check intervention will be followed up at 4-months, and at 12-months (Zimbabwe only).

237 **Stakeholder engagement**

238 In each city, the research study is undertaken in partnership with both the national and municipal

239 Ministries of Health and Education. Each country has a policy framework that provides encouragement

240 for the introduction of health and nutrition education and promotion among adolescents, including

241 screening for communicable and non-communicable diseases, immunization, growth monitoring and

242 assessments and nutritional services (30-32).

1  
2  
3 243 This study will build on stakeholder engagement, the process for which was established in each research  
4  
5 244 setting during the formative phase. In each city, a Community Advisory Committee (CAC) comprising key  
6  
7 245 community leaders and stakeholders will be reinforced or set up to facilitate input from, and feedback to,  
8  
9 246 participating communities and a Youth Advisory Group (YAG) will provide a forum for adolescents to input  
10  
11 247 into the programme. The YAG will meet with research staff at least 4 times per year, be active participants  
12  
13 248 in programme design and dissemination workshops, and help to ensure that the programme meets the  
14  
15 249 needs of adolescents. Community engagement will be an ongoing process through regular contacts with  
16  
17 250 the CAC, the YAG and other stakeholders, such as teachers, health workers, Community Based  
18  
19 251 Organizations (CBOs), Non-Governmental Organizations (NGOs), and religious leaders. In addition, a key  
20  
21 252 aspect for building confidence within communities is the knowledge that the study has the support of the  
22  
23 253 government.  
24  
25  
26  
27  
28

#### 29 254 **Intervention development and pilot testing**

30  
31  
32 255 Prior to implementation, preparatory activities will include community engagement, participatory co-  
33  
34 256 design, negotiating referral arrangements and pre-testing of screening tools, procedures and referral  
35  
36 257 protocols. Pilot studies in each setting will provide initial estimates of the frequency of health and  
37  
38 258 behavioural outcomes, and help to refine the intervention model.  
39  
40  
41

42 259 Pilot testing will involve the implementation of the screening tools and procedures with approximately  
43  
44 260 200 adolescents in each of the three cities with revisions and repeat pilot testing where required.  
45  
46 261 Adolescents who participate in the pilot study will be excluded from the main study if the procedures  
47  
48 262 change following the pilot. There will be an opportunity for young people and stakeholders to suggest  
49  
50 263 additional client-centered outcomes that may reflect some of their priority concerns or intentions that  
51  
52 264 should be captured.  
53  
54  
55  
56  
57  
58  
59  
60

1  
2  
3 **265 Intervention implementation**  
4  
5

6 266 The intervention will be delivered over a period of 2-6 months in each of the settings. The follow-up visits  
7  
8 267 will take place at the same school or community setting as the initial check-up. In addition to covering all  
9  
10 268 clinical costs, the equivalent of USD 5 will be given to each participant who attends the follow-up to cover  
11  
12 269 any transport costs that they might have incurred. Additionally, health and hygiene related items will also  
13  
14  
15 270 be provided for adolescents to take home, including tooth cleaning kit (toothbrush and toothpaste), fruit,  
16  
17 271 bottle of water, two pairs of underpants, pack of reusable sanitary pads (girls only)  
18  
19

20  
21 **272 Composition and training of Y-Check team**  
22  
23

24 273 The Y-Check team will be trained to deliver adolescent-responsive and age-appropriate services according  
25  
26 274 to national and WHO guidelines, recognizing also the needs for privacy and confidentiality (33). This  
27  
28 275 includes providing services that are attractive to adolescents, meet their needs comfortably and  
29  
30 276 responsively, and that are attentive to their privacy. These principles and approaches will be embedded  
31  
32 277 into each part of the Y-Check intervention. Visual and auditory privacy will be prioritized, through the use  
33  
34 278 of separate tents, rooms or screens. Health workers will employ standard gowning and draping for clinical  
35  
36  
37 279 procedures.  
38  
39

40  
41 280 For infection prevention and control (IPC), all study procedures including interviews, physical  
42  
43 281 examinations and blood tests will take place in well-aerated tents or outdoors, and will follow relevant  
44  
45 282 nationally-approved protocols for all staff and participants.  
46  
47

48  
49 283 The Y-Check team will be trained in good clinical practice, data protection and confidentiality, and clinical  
50  
51 284 staff will be trained in counselling for participants testing positive for any of the conditions being screened  
52  
53 285 for within Y-Check as well as in general counselling skills.  
54  
55  
56  
57

1  
2  
3 **286 Inclusion and exclusion criteria**  
4  
5

6 **287** To be included in the study, adolescents aged 10-19 years must fall into one of the first three categories  
7  
8  
9 **288** below and fulfil category 4.  
10

11  
12 **289** 1) Be attending selected classes of Year 5 of primary school in Mwanza (median age 11 years); Grade 5/6  
13  
14 **290** of primary school in Chitungwiza (median age 11 years); or Year 1 of Junior Secondary School in Cape  
15  
16 **291** Coast (median age 12 years) OR  
17

18  
19  
20 **292** 2) Be attending selected classes in Year 3 of Secondary School in Mwanza (median age 17 years), Form  
21  
22 **293** 3/4 in Chitungwiza (median age 17 years), or Year 2 of Senior Secondary School in Cape Coast (median  
23  
24 **294** age 16 years) OR  
25

26  
27  
28 **295** 3) Be resident in a selected community during the time of the Y-Check intervention, and be aged 16-19  
29  
30 **296** years  
31

32  
33 **297** AND  
34  
35

36  
37 **298** 4) Have a completed and signed Informed Consent form, or a signed Informed Assent Form and signed  
38  
39 **299** Parental/Guardian Informed Consent Form if the adolescent is seen in the community and is below the  
40  
41 **300** national age of consent or is seen in a school, irrespective of their age.  
42  
43  
44

45 **301 Consent and Assent procedures**  
46  
47

48 **302** Before the visit of the implementation team, information on the Y-Check programme will be distributed  
49  
50 **303** to parents/guardians through the schools and to community members through an active communication  
51  
52 **304** campaign in collaboration with the CAC and the YAG. School and community meetings will allow parents  
53  
54 **305** and community members to ask questions about the programme and give their feedback.  
55  
56  
57

1  
2  
3 306 In schools, adolescents will have a short introductory meeting with a member of the Y-Check team  
4  
5 307 typically in a class or group setting. Parents meetings will then be held in each of the schools, to which all  
6  
7 308 the parents and guardians of eligible learners will be invited. During these sessions, information will be  
8  
9  
10 309 provided about the study, its objectives and procedures, possible risks and procedures that will be used  
11  
12 310 to maintain confidentiality. These meetings will provide an opportunity for the adolescents, parents and  
13  
14 311 guardians of eligible adolescents to learn more about the Y-Check intervention and the research linked to  
15  
16 312 it and to have their questions answered.

17  
18  
19  
20 313 No participants will be screened, receive care or be counselled or interviewed without their informed  
21  
22 314 consent (community participants who are above the national age of consent), or, for minors, their assent  
23  
24 315 and parental consent, unless they are determined to be emancipated minors (34). Following advice from  
25  
26 316 Ministries of Education in all three countries, all adolescents seen in schools will be considered to be  
27  
28 317 minors and require parental consent, irrespective of their age.

29  
30  
31  
32 318 Minor adolescents' assent will be ascertained and documented in an assent form. Parents or guardians  
33  
34 319 who would like their adolescent to receive the check-up will be asked to provide their written consent.  
35  
36 320 On the day of the check-up visit, a verbal confirmation of their previous written assent will be requested  
37  
38 321 from the adolescent. In Ghana and Tanzania, where the minimum age for providing consent to medical  
39  
40 322 and health-related research is 18 years, clients of all ages under 18 will provide completed parental  
41  
42 323 consent forms and provide written assent before proceeding through the check-up visit regardless of  
43  
44 324 whether the check-up is in schools or communities. In Zimbabwe, a waiver of parental consent has been  
45  
46 325 given by the Medical Research Council of Zimbabwe (MRC-Zimbabwe) so that participants aged 16 and 17  
47  
48 326 years who attend the check-ups in the community venues will be allowed to provide written consent for  
49  
50 327 themselves.  
51  
52  
53  
54  
55  
56  
57  
58  
59  
60

1  
2  
3 328 The intervention will be conducted in private and not in the presence of the parent or guardian. Contact  
4  
5 329 details of the study team will be shared with participants in case they have questions at a later stage. All  
6  
7 330 participants will be reminded that participation is entirely voluntary and will be told that they can opt out  
8  
9 331 of the research or services at any time.  
10  
11  
12

### 13 332 **Data collection**

#### 16 333 *During the Y-Check intervention and follow up*

17  
18  
19 334 Data collection during baseline and follow-up visits will include self-completed evaluation questionnaires,  
20  
21 335 self-reported screening tool responses and screening visit consultations, measurements and specimen  
22  
23 336 collection and an exit interview. Data on the implementation process and on adolescent outcomes will be  
24  
25 337 collected in digital and paper-based formats. A user-friendly digital data collection app for the check-ups  
26  
27 338 will be developed and housed on a tablet computer for direct use by the adolescent. Initial sections will  
28  
29 339 include audio-assisted, user-friendly self-completion questions for adolescents to fill out. This will utilize  
30  
31 340 engaging content and processes, tailored to adolescents' interests. The option of a face-to-face interview  
32  
33 341 will also be available if the adolescent is unable to use the tablet or has low literacy level. Health services  
34  
35 342 registers and school registers will also be reviewed to determine the number of adolescents of the  
36  
37 343 relevant age ranges, and school attendance by the classes involved in Y-Check. To help build the referral  
38  
39 344 process, existing adolescent services will be mapped in the study communities.  
40  
41  
42  
43  
44

45 345

#### 46 346 *Process evaluation*

47  
48 347 The process evaluation is guided by the UK MRC's Process Evaluation framework to understand  
49  
50 348 intervention implementation (including feasibility and fidelity), mechanisms of impact (including  
51  
52 349 acceptability and uptake), and the influence of context (35). Key implementation outcomes of interest are  
53  
54 350 acceptability, adoption, appropriateness, feasibility, and fidelity. Data on contextual factors and barriers  
55  
56  
57  
58  
59  
60

1  
2  
3 351 and facilitators to programme implementation will be gathered using routinely-collected programme  
4  
5 352 monitoring data. Qualitative data will be collected through 1) observations of the Y-Check intervention  
6  
7 353 and referrals, as well as team meetings; 2) in-depth interviews with eligible adolescents who received,  
8  
9 354 adolescents who were referred, and adolescents who did not receive Y-Check, as well as with school  
10  
11 355 authorities and the Y-Check service providers; and 3) participatory workshops with teachers, adolescents,  
12  
13 356 and parents. Quantitative programme monitoring data will be collected routinely within the Y-Check visit,  
14  
15 357 including through a participant exit interview. Process evaluation data will be analysed iteratively and  
16  
17 358 thematically, through regular analytical discussions and analytical memos to draw out the main themes  
18  
19 359 emerging from the data. Across the pilot and intervention studies, data collection for the process  
20  
21 360 evaluation will include real-time feedback to the implementation team.  
22  
23  
24

25 361 *Economic evaluation*

26  
27  
28 362 A costing study will be conducted to estimate the total costs of developing, setting up, and running the Y-  
29  
30 363 Check package, in school and community settings. A combination of top-down and ingredients-based  
31  
32 364 costing approaches will be used to generate cost estimates for the whole package, and for each  
33  
34 365 component/activity. All costs will be estimated from the perspectives of the adolescents, the  
35  
36 366 schools/community and implementing partners/service providers. Financial and economic costs will be  
37  
38 367 calculated for all inputs. These inputs will be identified and measured using process data, staff interviews  
39  
40 368 and observations, document review, and accounting records.  
41  
42  
43  
44

45 369 Costs will be inputted and analysed in an Excel-based costing tool. The cost analysis will describe the  
46  
47 370 distribution of costs across different forms of inputs, and will estimate the unit cost per adolescent  
48  
49 371 reached, screened, and treated on the spot or referred; cost per unit of measure for selected process and  
50  
51 372 effect outcomes such as cost per condition detected, cost per condition appropriately treated on-the-spot  
52  
53 373 or with a completed referral within 4 months, cost for a unit improvement in reported quality of life and  
54  
55 374 Disability Adjusted Life Years (DALYs) averted.  
56  
57

1  
2  
3 375 The cost and cost-effectiveness estimates will be compared to other programmes in the region (eg. human  
4  
5 376 papillomavirus vaccination, deworming) and will inform programme replication, scalability, and financial  
6  
7 377 sustainability.  
8  
9

#### 10 378 *Data protections*

11  
12  
13 379 Data protection will be strictly observed. After study completion, data will be stored in the LSHTM-curated  
14  
15 380 digital repository 'Data Compass' following General Data Protection Regulation (GDPR) guidelines. Data  
16  
17 381 and code registered in LSHTM Data Compass will be made open access following deposit. A Data Safety  
18  
19 382 and Monitoring Board (DSMB) has been constituted to assist in managing adverse events, though we  
20  
21 383 expect these to be very rare since all treatment and care are standard with no novel treatments.  
22  
23  
24

#### 25 384 **Study outcomes**

26  
27  
28  
29 385 Outcomes will be ascertained during the check-up screening visit and through collection of referral  
30  
31 386 vouchers from the referral health facilities, and, for outcomes related to health and wellbeing impacts,  
32  
33 387 through data from the 4-month and, in Zimbabwe only, 12-month follow-up visits. Outcomes related to  
34  
35 388 completed referrals will be triangulated against participants' self-reports at the 4-month and. In  
36  
37 389 Zimbabwe only, 12-month follow-up visits. Review of school and health service registers will be used to  
38  
39 390 see whether attendance has increased during the period when Y-Check is being implemented.  
40  
41  
42

43 391 The primary outcome will be the proportion of those screening positive for at least one condition who  
44  
45 392 receive appropriate on-the-spot care or complete appropriate referral for all identified conditions within  
46  
47 393 4 months. This will be measured using data collected at the initial check-up visit and through recovery of  
48  
49 394 referral vouchers given to participants to allow them to access referral services for free during the 4-  
50  
51 395 months after the Y-Check screening. Completed referral is defined as attending at least the first referral  
52  
53 396 appointment.  
54  
55  
56  
57



1  
2  
3 397 Secondary implementation outcomes will include the proportion of those screening positive for each  
4  
5 398 condition who receive appropriate on-the-spot care or complete appropriate referral for that condition  
6  
7 399 within 4 months, the yield of previously untreated conditions, clinical outcomes at 4 months among those  
8  
9 400 who had originally screened positive for each condition, and intervention acceptability, adoption,  
10  
11 401 appropriateness, feasibility, fidelity and cost. Secondary effectiveness outcomes will include knowledge  
12  
13 402 about health services and health behaviours, self-reported agency and self-efficacy to make decisions  
14  
15 403 about their health, self-reported health-related risk and protective behaviours, reported engagement  
16  
17 404 with health services, wellbeing, self-esteem and quality of life, clinical outcomes, and educational  
18  
19 405 outcomes, which will be collected within the Y-Check and follow-up visits. The short-term cost-  
20  
21 406 effectiveness of the intervention will be estimated (calculated by a comparison of the costs of the  
22  
23 407 intervention against the primary and secondary outcomes and including short-term changes in self-  
24  
25 408 reported quality of life). All outcomes for the study are described in Table 2.  
26  
27  
28  
29  
30

### 31 409 **Sample size**

32  
33 410 In each city, the intervention will be implemented for 10-14 year-olds in up to 6 government primary  
34  
35 411 schools (N=500 for young adolescent girls, and N=500 for young adolescent boys), and for 15-19 year-olds  
36  
37 412 in up to 8 secondary schools and up to 3 community venues (N=500 for older adolescent girls, and N=500  
38  
39 413 for older adolescent boys), giving a total sample size of 2,000 adolescents (10-19y).  
40  
41  
42  
43

44  
45 415 The sample size provides specified precision around the primary outcome. For example, for the primary  
46  
47 416 outcome, within each age group and gender, if 150 (30%) of 500 participants screen positive for at least  
48  
49 417 one condition, and 75% of those who screen positive are correctly managed (n=112), the 95% CI for  
50  
51 418 correct management will be +/- 7%. The primary outcome used data from the initial check-up visit and  
52  
53 419 referrals and did not require the 4-month follow-up data.  
54  
55  
56  
57  
58  
59  
60

420 **Table 2: Study outcomes and means of verification**

| Outcome                                                                                                                                                                                                                                                                                                                                                      | Sources of data                                                                                                                                                                                                                                                                                                                   |
|--------------------------------------------------------------------------------------------------------------------------------------------------------------------------------------------------------------------------------------------------------------------------------------------------------------------------------------------------------------|-----------------------------------------------------------------------------------------------------------------------------------------------------------------------------------------------------------------------------------------------------------------------------------------------------------------------------------|
| <b>Primary outcome</b>                                                                                                                                                                                                                                                                                                                                       |                                                                                                                                                                                                                                                                                                                                   |
| Proportion of those screening positive for at least one condition who receive appropriate on-the-spot care or complete appropriate referral for all identified conditions within 4 months (i.e. they attend a provider for referral care who has been accredited by the study team and has been shown to be capable of providing appropriate referral care). | <ul style="list-style-type: none"> <li>• Programme monitoring data including records of attendance for referrals</li> <li>• Screening tool (self-reported symptoms or conditions, measurements and clinical actions)</li> </ul>                                                                                                   |
| <b>Secondary outcomes</b>                                                                                                                                                                                                                                                                                                                                    |                                                                                                                                                                                                                                                                                                                                   |
| <b>Implementation outcomes</b>                                                                                                                                                                                                                                                                                                                               |                                                                                                                                                                                                                                                                                                                                   |
| Proportion of those screening positive for each condition who receive appropriate on-the-spot care or complete appropriate referral for that condition within 4 months.                                                                                                                                                                                      | <ul style="list-style-type: none"> <li>• Programme monitoring data including records of attendance for referrals</li> <li>• Screening tool (self-reported symptoms or conditions, measurements, and clinical actions)</li> </ul>                                                                                                  |
| The yield of previously untreated conditions.                                                                                                                                                                                                                                                                                                                | <ul style="list-style-type: none"> <li>• Programme monitoring data including records of attendance for referrals</li> <li>• Screening tool (self-reported symptoms or conditions, measurements, and clinical actions)</li> </ul>                                                                                                  |
| Intervention acceptability (satisfaction): acceptability to adolescents and to other stakeholders (eg. schools, parents, health workers).                                                                                                                                                                                                                    | <ul style="list-style-type: none"> <li>• Programme monitoring data including records of attendance for referrals</li> <li>• Screening tool (self-reported symptoms or conditions, measurements, and clinical actions)</li> </ul>                                                                                                  |
| Intervention adoption (uptake, utilization): Y-Check uptake, referrals completed.                                                                                                                                                                                                                                                                            | <ul style="list-style-type: none"> <li>• Self-completed evaluation questionnaire</li> <li>• Exit interviews</li> </ul>                                                                                                                                                                                                            |
| Intervention appropriateness (perceived fit, perceived relevance, perceived usefulness): perceived value of the intervention to adolescents and to other stakeholders.                                                                                                                                                                                       | <ul style="list-style-type: none"> <li>• Observations of the Y-Check visits and of selected referrals</li> <li>• Interviews and workshops with adolescents, healthcare providers, community members, teachers, parents and key stakeholders</li> </ul>                                                                            |
| Intervention feasibility (actual fit, practicability): Y-Check visits completed, referrals completed, stakeholder support (including community).                                                                                                                                                                                                             | <ul style="list-style-type: none"> <li>• Interviews and workshops with adolescents, healthcare providers, community members, teachers, parents and key stakeholders</li> <li>• Observations of the Y-Check visits and of selected referrals, including youth friendly services</li> <li>• Self-reported screening tool</li> </ul> |
| Intervention fidelity (adherence, integrity, quality): completeness of training for and delivery of intervention components; diagnostic accuracy; youth-friendly health services quality assessment.                                                                                                                                                         | <ul style="list-style-type: none"> <li>• Interviews and workshops with adolescents, healthcare providers, community members, teachers, parents and key stakeholders</li> <li>• Observations of the Y-Check visits and of selected referrals, including youth friendly services</li> <li>• Self-reported screening tool</li> </ul> |
| <b>Economic outcomes</b>                                                                                                                                                                                                                                                                                                                                     |                                                                                                                                                                                                                                                                                                                                   |
| Cost of setting up and running the intervention.                                                                                                                                                                                                                                                                                                             | <ul style="list-style-type: none"> <li>• Y-Check documentation and financial records</li> </ul>                                                                                                                                                                                                                                   |
| Cost per adolescent with a newly diagnosed condition (overall and by condition).                                                                                                                                                                                                                                                                             | <ul style="list-style-type: none"> <li>• Interviews with Y-Check staff and staff of the referral facilities.</li> </ul>                                                                                                                                                                                                           |
| Cost per adolescent with a newly diagnosed condition who received appropriate on-the-spot care or who completed an appropriate referral within 4 months (overall and by condition).                                                                                                                                                                          | <ul style="list-style-type: none"> <li>• Programme monitoring data including records of attendance for referrals</li> </ul>                                                                                                                                                                                                       |

|                                                                                                                                                                                         |                                                                                                                                                                                                                                                                              |
|-----------------------------------------------------------------------------------------------------------------------------------------------------------------------------------------|------------------------------------------------------------------------------------------------------------------------------------------------------------------------------------------------------------------------------------------------------------------------------|
| Short-term (4 months) cost-effectiveness: cost per improvement in health or wellbeing (e.g. cost per case addressed or cured), cost per unit improvement in QALYs and per DALY averted. | <ul style="list-style-type: none"> <li>Screening tool (self-reported symptoms or conditions, measurements and clinical actions)</li> </ul>                                                                                                                                   |
| <b>Client outcomes</b>                                                                                                                                                                  |                                                                                                                                                                                                                                                                              |
| Knowledge about health services and health behaviours.                                                                                                                                  | <ul style="list-style-type: none"> <li>Programme monitoring data including records of attendance for referrals</li> <li>Screening tool (self-reported symptoms or conditions, measurements and clinical actions)</li> <li>Self-completed evaluation questionnaire</li> </ul> |
| Intentions to adopt healthy behaviours.                                                                                                                                                 |                                                                                                                                                                                                                                                                              |
| Agency to make decisions about health and wellbeing.                                                                                                                                    |                                                                                                                                                                                                                                                                              |
| Perceived social support for behaviour change.                                                                                                                                          |                                                                                                                                                                                                                                                                              |
| Health-related risk and protective behaviours.                                                                                                                                          |                                                                                                                                                                                                                                                                              |
| Improvement in previously diagnosed health and wellbeing conditions.                                                                                                                    |                                                                                                                                                                                                                                                                              |
| Engagement with health and other services within the past 4 months.                                                                                                                     |                                                                                                                                                                                                                                                                              |
| Self-esteem.                                                                                                                                                                            |                                                                                                                                                                                                                                                                              |
| Self-perceived wellbeing.                                                                                                                                                               |                                                                                                                                                                                                                                                                              |
| Quality of life.                                                                                                                                                                        |                                                                                                                                                                                                                                                                              |
| Clinical outcomes.                                                                                                                                                                      |                                                                                                                                                                                                                                                                              |
| Educational outcomes (e.g. school attendance).                                                                                                                                          | <ul style="list-style-type: none"> <li>Self-completed evaluation questionnaire</li> <li>School register review</li> </ul>                                                                                                                                                    |
| Client-defined outcomes (to be determined).                                                                                                                                             | <ul style="list-style-type: none"> <li>Self-completed evaluation questionnaire</li> <li>Exit interviews</li> </ul>                                                                                                                                                           |

421

## 422 Statistical analysis

423 All primary analyses will be conducted separately by study city; Cape Coast, Chitungwiza and Mwanza.

424 Where comparable, secondary analyses will be conducted with the data from all three cities combined.

425 In our study sites, a contemporaneous comparison group is not required since no routine screening is  
 426 currently taking place, and as a result, assessments at baseline will serve as the counterfactual for internal  
 427 comparisons. Similarly, since there is no routine screening and treatment provided to adolescents of the  
 428 target ages in the study population, a before-after comparison is appropriate since it is plausible to assume  
 429 that reductions in the prevalence of the chronic conditions between the original Y-Check visit and the  
 430 follow-up at four months will be due to the interventions provided through Y-Check.

431 We will follow STROBE guidelines for the reporting of cohort studies. Descriptive analyses will be used to  
 432 compare the community-level and school-level characteristics of the study communities and schools.

1  
2  
3 433 Quantitative programmatic data, including screening test results, services delivered, and referrals made  
4  
5 434 and completed, will be reported by age, sex, and city. The primary outcome is a single proportion which  
6  
7 435 will be presented with a 95% confidence interval for each of the 4 target groups: 10–14-year-old males,  
8  
9 436 10-14 year-old females, 15-19 year-old males, 15-19 year-old females.

11  
12  
13 437 Secondary outcomes which are measured at a single time point will be presented in a similar way to the  
14  
15 438 primary outcome. For outcomes which are measured at two or more time points, a before-after analysis  
16  
17 439 will be conducted comparing differences in measures between the time points. The unit of analysis will  
18  
19 440 be the individual. For clinical outcomes which are measured at two or more time-points, the initial check-  
20  
21 441 up visit (baseline) will give the prevalence of untreated conditions which will represent the counterfactual.  
22  
23 442 The prevalence of conditions at the 4-month follow-up visit will be formally compared to this  
24  
25 443 counterfactual to estimate the short-term effects of the intervention in improving these clinical outcomes.  
26  
27 444 For analysis of outcomes measured at two timepoints we will use mixed effects logistic regression (binary  
28  
29 445 outcomes) or linear regression (continuous outcomes) adjusting for individual-level clustering as a random  
30  
31 446 effect and school/community as a fixed effect. Health service and client determinants of correct  
32  
33 447 management of conditions at 4 months will be analyzed using multivariable regression.  
34  
35  
36  
37  
38

#### 39 448 Ethics and Dissemination

40  
41  
42 449 Ethics clearance has been received from WHO (WHO/ERC.0003778) and from all country national ethics  
43  
44 450 bodies. Protocol modifications will be shared with the WHO Ethics Review Committee and relevant  
45  
46 451 national ethics boards. Results will be published in at least 3 country-specific peer reviewed journal  
47  
48 452 publications and one multi-country publication. There will also be videos, briefs, webinars and meetings  
49  
50 453 to disseminate results. All data will be placed into an open access repository after deidentification and  
51  
52 454 anonymisation to ensure confidentiality and participant privacy.  
53  
54  
55  
56  
57  
58  
59  
60

455

**456 Discussion**

457 Over the last decade, adolescent wellbeing has become a global priority (5). School health is also a growing  
458 area of policy interest (36). WHO guidelines on school health services note that along with health  
459 promotion, health education, preventive interventions (such as immunizations and mass drug  
460 administration), clinical assessment and health services management, health screenings within school  
461 learners are one of the key pillars in the delivery of comprehensive school health services (16). Screening  
462 programs such as Y-Check provide a unique opportunity to detect easily treatable, high-burden health  
463 conditions, refer those requiring medical attention, treatment and care, as well as to advise and  
464 encourage adolescents to engage in healthy behaviours.

465 In a 2015 review, school health services were found to exist in at least 102 countries though their content  
466 varied considerably across 16 areas including vaccinations, sexual and reproductive health education,  
467 vision screening, nutrition screening, and nutrition health education (37). If all types of screening were  
468 combined, they were the second most commonly reported intervention in school health services, second  
469 only to immunization. A later systematic review found evidence of routine health check-ups of school age  
470 children having been reported in 86 countries worldwide (17). Despite their widespread existence, little  
471 quality evidence exists on how to promote good health for adolescents in educational settings (37), and  
472 even less for multi-component school health services (38) especially in low- and middle-income countries  
473 (39).

474 Good practices in conducting adolescent health or wellbeing screenings are rarely reported. In 2023, WHO  
475 will release new guidance on well-child and well-adolescent visits, which will recommend expanding  
476 routine screening tests to also integrate other wellbeing dimensions through a broader evaluation of  
477 social risks, emotional state, and individual and family resources delivered with context-specific

1  
2  
3 478 recommendations at key moments during the first two decades of life. The successful implementation of  
4  
5 479 such guidance requires robust measurement of the effectiveness of preventive interventions in  
6  
7 480 adolescence (40).

9  
10  
11 481 Evaluation of the Y-Check intervention will incorporate implementation science and effectiveness  
12  
13 482 research. Such hybrid designs have important advantages over conducting separate studies. These include  
14  
15 483 the potential for quicker translation of intervention research findings into programmes, the development  
16  
17 484 and selection of more effective implementation strategies, and more useful information for decision  
18  
19 485 makers (41).

20  
21  
22  
23 486 The process evaluation findings will provide guidance for the next stage of the programme and for  
24  
25 487 potential future sustainable and scalable implementation by local health authorities should it prove  
26  
27 488 successful. Data on the short-term changes in clinical and behavioural outcomes will be used as inputs to  
28  
29 489 model both short-term and long-term health and social impacts and as inputs to sample size and power  
30  
31 490 calculations for a third phase of the Y-Check research programme, which plans to undertake a rigorous  
32  
33 491 population level evaluation of the impact of routine check-ups on adolescent health and wellbeing.

34  
35  
36  
37  
38 492 Through WHO's advice to member states, findings from the Y-Check study have the potential to shape the  
39  
40 493 delivery of adolescent health check-ups globally including identifying the optimal number, content and  
41  
42 494 delivery for these services. Y-Check will advance the field by providing some of the first rigorous  
43  
44 495 information on the effects of a health screening programme in three African cities, assessing  
45  
46 496 implementation, effectiveness, cost and cost-effectiveness outcomes.

47  
48  
49  
50 497 **Acknowledgements:** The authors thank our Programme Advisors: Prof Simon Gregson, Dr. Sachin Shinde,  
51  
52 498 Prof Fred Binka, Dr. Suzanne Petroni, Prof. Audrey Pettifor, Prof Shane Norris, Prof. James Hargreaves,  
53  
54 499 Ms. Patience Manhibi, Mr Aveneni Mangome. DSMB members are Prof. David Mabey, Dr Andrew Abassa,

500 Prof Fred Binka and Dr Nothando Ngwenya. The authors thank adolescent participants in three countries.

501 The support of participating Ministry officials in Ghana, Tanzania and Zimbabwe is gratefully  
502 acknowledged.

503 **Authors' contributions:** PB, AD, DR conceived and drafted the paper. BW, SK, HAW, VB, FN, FG, MKN,  
504 GG, and RAF contributed to writing.

505 **Competing interests:** PB and VB are WHO staff members. The opinions expressed are theirs and do not  
506 necessarily represent the policies and positions of the World Health Organization. The other authors  
507 declared no competing interests.

508 **Funding statement:** This work was supported by the Botnar Foundation grant number (RG21-001) and  
509 UKRI (MR/T043156/1)

## 510 References

- 511 1. Bundy DAP, de Silva N, Horton S, Patton GC, Schultz L, Jamison DT. Investment in child and  
512 adolescent health and development: key messages from Disease Control Priorities, 3rd Edition.  
513 Lancet. 2018;391(10121):687-99.
- 514 2. World Bank. World Development Report 2019: The Changing Nature of Work. Washington, DC:  
515 World Bank; 2019.
- 516 3. Tomlinson M, Ross DA, Bahl R, et al. What will it take for children and adolescents to thrive? The  
517 Global Strategy for Women's, Children's, and Adolescents' Health. Lancet Child Adolesc Health.  
518 2019;3(4):208-9.
- 519 4. WHO. Global accelerated action for the health of adolescents (AA-HA!): guidance to support  
520 country implementation, 2017.
- 521 5. WHO. Accelerated Action for the Health of Adolescents (AA-HA! 2.0) Forthcoming. Geneva:  
522 World Health Organization; 2023.
- 523 6. Kuper H, Monteath-van Dok A, Wing K, et al. The impact of disability on the lives of children;  
524 cross-sectional data including 8,900 children with disabilities and 898,834 children without  
525 disabilities across 30 countries. PLoS One. 2014;9(9):e107300.
- 526 7. WHO. Health for the World's Adolescents: A second chance in the second decade. Geneva:  
527 World Health Organization; 2014.
- 528 8. Kruk ME, et al. Improving health and social systems for all children in LMICs: structural  
529 innovations to deliver high-quality services. Lancet. 2022;399(10337):1830-1844.
- 530 9. World Health Organization (WHO). Making health services adolescent friendly: developing  
531 national quality standards for adolescent friendly health services, 2012.
- 532 10. Patton GC, Sawyer SM, Santelli JS, et al. Our future: a Lancet commission on adolescent health  
533 and wellbeing. Lancet. 2016;387(10036):2423-2478.
- 534 11. Sancu L. Clinical preventive services for adolescents: facing the challenge of proving "an ounce of  
535 prevention is worth a pound of cure". J Adolesc Health. 2011;49(5):450-2.



12. Harris SK, Aalsma MC, Weitzman ER, Garcia-Huidobro D, Wong C, Hadland SE, Santelli J, Park MJ, Ozer EM. Research on clinical preventive services for adolescents and young adults: where are we and where do we need to go?. *Journal of Adolescent Health*. 2017 Mar 1;60(3):249-60.
13. Nagata JM, Hathi S, Ferguson BJ, Hindin MJ, Yoshida S, Ross DA. Research priorities for adolescent health in low- and middle-income countries: A mixed-methods synthesis of two separate exercises. *J Glob Health*. 2018;8(1):doi:10.7189/jogh.08.010501.
14. Bright Futures, American Academy of Pediatrics. Bright Futures. Guidelines for health supervision of infants, children, and adolescents. 2016;4.
15. Royal Australasian College of General Practitioners. Guidelines for Preventive Activities in General Practice, Volume Spec No. 8th ed. East Melbourne: Royal Australasian College of General Practitioners; 2012.
16. WHO. WHO Guideline on School Health Services. 2021.
17. Baltag V, Moran D. Are Routine Health Examinations Fulfilling their Promise for Prevention? *Health Behav Policy Rev*. 2018;5(6):22.
18. Hoffmann TC, Glasziou PP, Boutron I, et al. Better reporting of interventions: template for intervention description and replication (TIDieR) checklist and guide. *BMJ*. 2014;348.
19. Chingono RM, Mackworth-Young CRS, Ross DA, et al. Designing routine health check-ups for adolescents in Zimbabwe. *J Adolesc Health*. 2021;69:940-7.
20. Weobong B, Glozah FN, Abdulai HBT, Koka E, Addae N, Alor S, Kohl K, Banati P, Adongo PB, Ross DA. Reaching adolescents with health services: systematic development of an adolescent health check-ups programme in Ghana (Y-Check, Ghana). (in preparation).
21. Sedekia Y, Mshana G, Nsanya MK, Kohl K, Wambura M, Grosskurth H, Ross DA, Kapiga S. Routine health check-ups for adolescents in Mwanza City, Tanzania: stakeholders' recommendations on its content, venue, and mode of delivery. *BMC public health*. 2023 May 30;23(1):1015.
22. WHO. Report of Y check Phase 1 to Botnar Foundation, 2020.
23. Green L, Kreuter M. The precede-proceed model. *Health promotion planning: an educational approach*. 3rd ed. Mountain View (CA): Mayfield Publishing Company; 1999. p. 32-43.
24. McLeroy KR, Bibeau D, Steckler A, Glanz K. An ecological perspective on health promotion programs. *Health Educ Q*. 1988;15(4):351-377.
25. UNESCO. Net enrollment statistics available at <http://uis.unesco.org>. Downloaded March 18 2023.
26. National Bureau of Statistics. Mwanza Region - Basic Demographic and Socio-Economic Profile (2012 Census) - National Bureau of Statistics (NBS).; 2016.
27. Ilemela Municipal Council. Ilemela Municipal Council Strategic Plan (2016/2021).; 2017. doi:10.5089/9781513547442.002
28. Zimbabwe National Statistics Agency (ZIMSTAT). Education Statistics Report 2018-2020. Published November 2021. Available from: [https://www.zimstat.co.zw/wp-content/uploads/publications/Social/Education/Education\\_Report\\_2020.pdf](https://www.zimstat.co.zw/wp-content/uploads/publications/Social/Education/Education_Report_2020.pdf).
29. Zimbabwe Ministry of Primary and Secondary Education (MoPSE). 2021 Primary and Secondary Education Statistics Report. Published May 2022. Available from: <http://mopse.co.zw/sites/default/files/public/downloads/EMIS%202021%20Annual%20Education%20Statistics%20Report.pdf>.
30. Government of Zimbabwe. Zimbabwe School Health Policy. Harare, Zimbabwe; 2018.
31. Ghana Health Service. Adolescent health service policy and strategy, 2016-2020. Accra, Ghana Health Service. 2016.



- 1  
2  
3 582 32. Government of Tanzania. Health Sector Strategic Plan July 2021 – June 2026 (HSSP V): Leaving  
4 583 No One Behind. Ministry of Health, Community Development, Gender, Elderly and Children, Dar  
5 584 es Salaam; 2021.
- 7 585 33. WHO. Global standards for quality health-care services for adolescents: a guide to implement a  
8 586 standards-driven approach to improve the quality of health care services for adolescents. 2015  
9 587 Available from: <https://apps.who.int/iris/handle/10665/183935>.
- 11 588 34. WHO. Assessing and supporting adolescents' capacity for autonomous decision-making in health  
12 589 care settings: a tool for health-care providers. Geneva: World Health Organization; 2021.
- 13 590 35. Moore GF, Audrey S, Barker M, et al. Process evaluation of complex interventions: Medical  
14 591 Research Council guidance. *BMJ*. 2015;350:h1258.
- 15 592 36. WHO and UNESCO. Making every school a health-promoting school: global standards and  
16 593 indicators for health-promoting schools and systems. Geneva: World Health Organization and  
17 594 UNESCO; 2021.
- 19 595 37. Baltag V, Pachyna A, Hall J. Global overview of school health services: data from 102 countries.  
20 596 *Health Behav Policy Rev*. 2015;2(4):268-83.
- 21 597 38. Levinson J, Kohl K, Baltag V, Ross DA. Investigating the effectiveness of school health services  
22 598 delivered by a health provider: a systematic review of systematic reviews. *PLoS One*.  
23 599 2019;14(6):e0212603.
- 25 600 39. Montgomery P, Knerr W, Ross DA, Patterson J. The effectiveness and acceptability of  
26 601 comprehensive and multicomponent school health services: A systematic review. *J Adolesc*  
27 602 *Health*. 2022;70:192-207.
- 28 603 40. Banati P, Banerjee A, Daelmans B, Baltag V. The need for new models to measure the impact of  
29 604 prevention. *J Adolesc Health*. 2023;72(1):9-11.
- 31 605 41. Curran GM, Bauer M, Mittman B, Pyne JM, Stetler C. Effectiveness-implementation hybrid  
32 606 designs: combining elements of clinical effectiveness and implementation research to enhance  
33 607 public health impact. *Med Care*. 2012;50(3):217-26.

608

39 609 **Figure 1: Theory of Change for Y-Check, an adolescent health and wellbeing check-up**

41 610 **Figure 2: The Y-Check Intervention package<sup>1</sup>**

Figure 1: Theory of Change for Y-Check, an adolescent health and wellbeing check-up

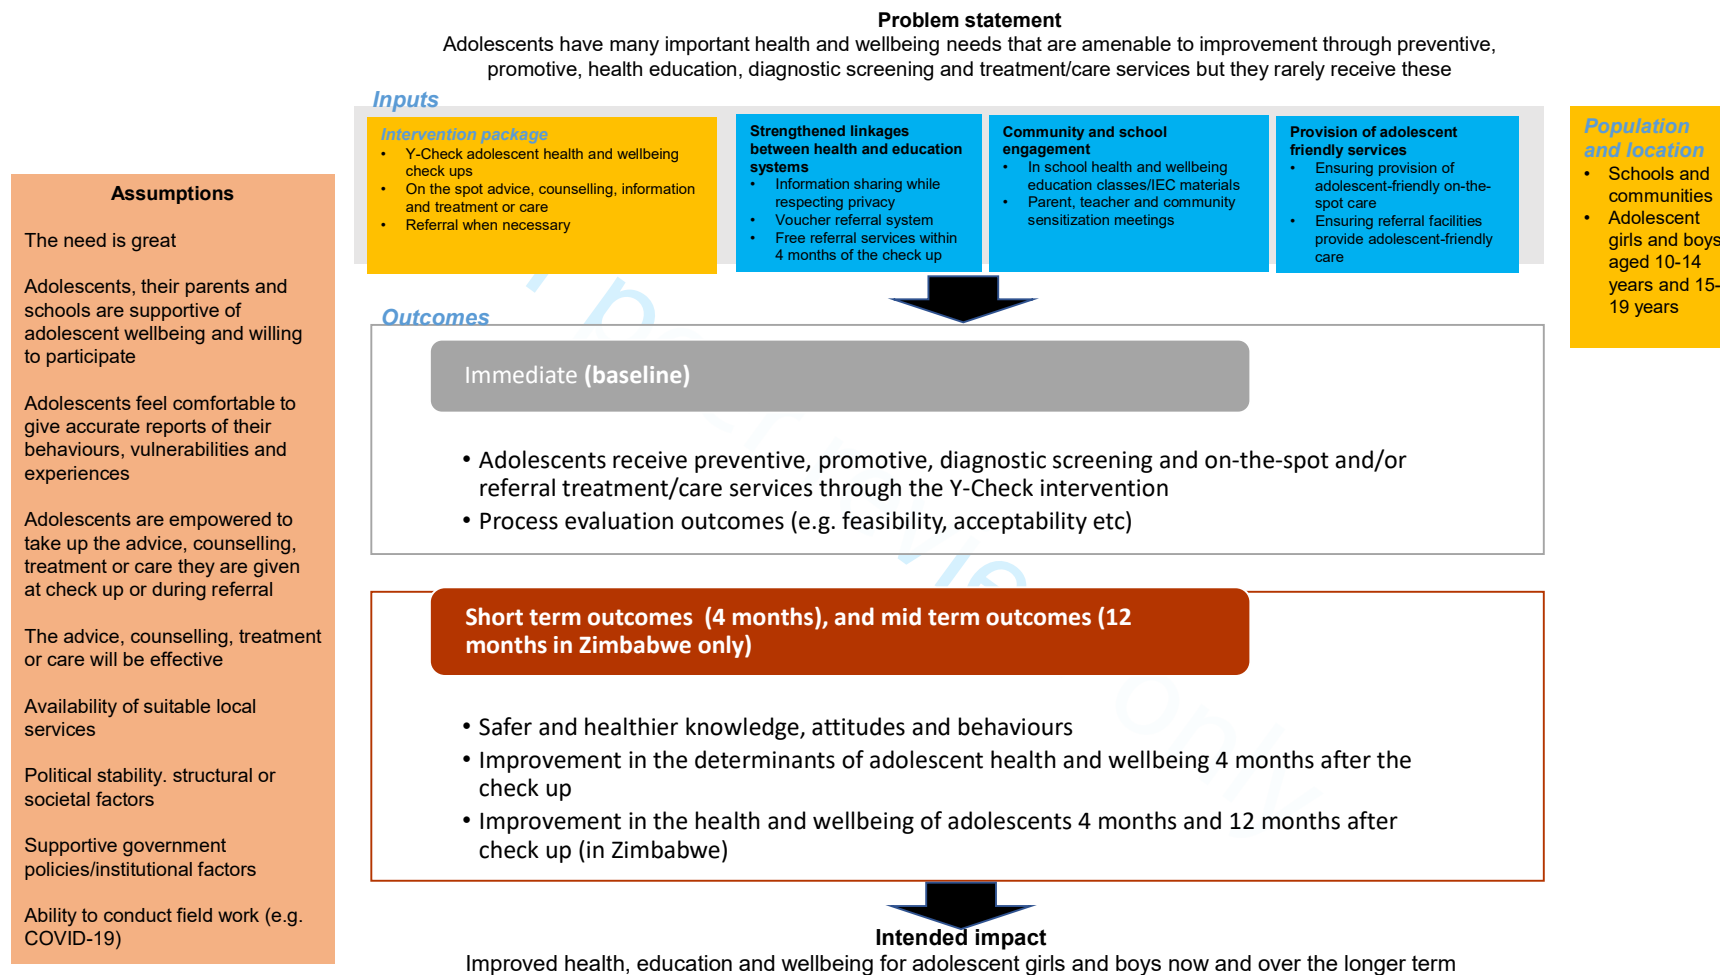

Figure 2: The Y-Check Intervention package<sup>1</sup>

### Y-Check screening, on-the-spot care and referral services

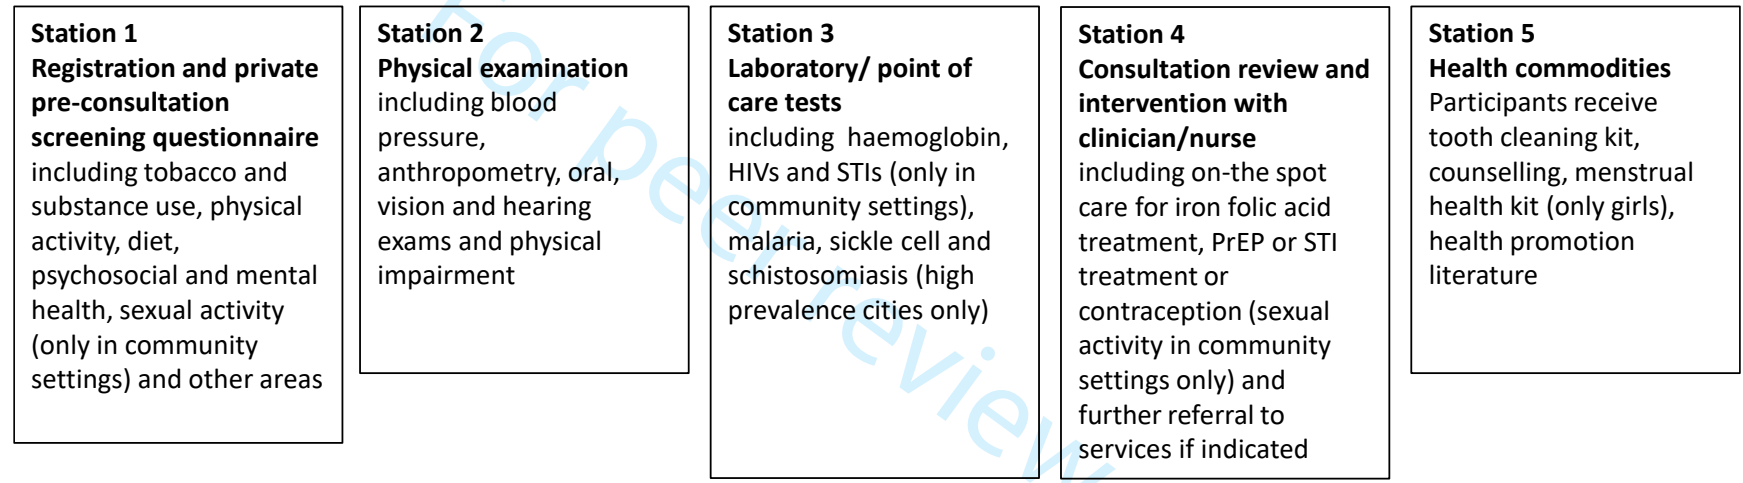

<sup>1</sup> The intervention package may vary according to setting

**Table 1: Template for Intervention Description and Replication (TIDieR) checklist describing the Y-Check intervention**

| Item                      | Item                                                                                                                                                                                                                                                                                                                                                                                                                                                                                                                                                                           |
|---------------------------|--------------------------------------------------------------------------------------------------------------------------------------------------------------------------------------------------------------------------------------------------------------------------------------------------------------------------------------------------------------------------------------------------------------------------------------------------------------------------------------------------------------------------------------------------------------------------------|
| <b>Brief name</b>         |                                                                                                                                                                                                                                                                                                                                                                                                                                                                                                                                                                                |
| 1                         | Evaluating the effectiveness of adolescent health check-ups (Y-Check)                                                                                                                                                                                                                                                                                                                                                                                                                                                                                                          |
| <b>Why?</b>               |                                                                                                                                                                                                                                                                                                                                                                                                                                                                                                                                                                                |
| 2                         | Identifying adolescents with poor health, health-compromising behaviours or undiagnosed disability is important for their health and wellbeing, and also for communities and nations<br>Most adolescents only come into contact with health services when they are ill, and services are not always appropriate for their needs<br>Routine health and wellbeing check-up visits for adolescents that screen for multiple preventable and/or treatable conditions and risk behaviours could provide an entry point into services and be highly cost-effective                   |
| <b>What?</b>              |                                                                                                                                                                                                                                                                                                                                                                                                                                                                                                                                                                                |
| 3                         | The intervention includes a comprehensive health check-up for priority conditions customized to national and local contexts.<br>Where indicated, Y-Check will provide on-the-spot care and cover all clinical costs associated with referrals to further care provided by the public health system or non-governmental organizations (NGOs).<br>During the check-up, adolescents will receive health promotion information and limited supplies of key health commodities.<br>Clinical costs of services are covered by the study if accessed within 4 months of the check-up. |
| 4                         | Adolescent-friendly services will be provided, as defined by WHO (2018). Nationally-approved protocols will be applied. Adolescent privacy and confidentiality will be protected.                                                                                                                                                                                                                                                                                                                                                                                              |
| <b>Who provided?</b>      |                                                                                                                                                                                                                                                                                                                                                                                                                                                                                                                                                                                |
| 5                         | Y-Check teams will be staffed with health professionals trained to provide quality adolescent-friendly health services in line with nationally-approved protocols. Y-Check teams will also be trained in the use of the digital application which will be used for data collection. Public and private not-for-profit care facilities providing referrals will meet national accreditation guidelines.                                                                                                                                                                         |
| <b>How?</b>               |                                                                                                                                                                                                                                                                                                                                                                                                                                                                                                                                                                                |
| 6                         | The Y-Check service will take place over a 60-90 minute period face-to-face. Any referrals will only be subsidized by the study if they take place within 4 months.                                                                                                                                                                                                                                                                                                                                                                                                            |
| <b>Where?</b>             |                                                                                                                                                                                                                                                                                                                                                                                                                                                                                                                                                                                |
| 7                         | The Y-Check service will be provided in schools and community venues, in outdoor tents where required.<br>Referrals will be to public or private not-for-profit providers as close as possible to the adolescent's home. Providers will be vetted by the study team as being able to provide the necessary referral services to national and WHO-recommended standards.                                                                                                                                                                                                        |
| <b>When and How Much?</b> |                                                                                                                                                                                                                                                                                                                                                                                                                                                                                                                                                                                |
| 8                         | Within the current phase of the study, each adolescent will receive Y-Check once. Within a routine programme the intention would be that the intervention will be delivered twice during adolescence, once when the adolescent is 10-14 years old, and a second time when they are 15-19 years old.                                                                                                                                                                                                                                                                            |
| <b>Tailoring</b>          |                                                                                                                                                                                                                                                                                                                                                                                                                                                                                                                                                                                |
| 9                         | The content of the intervention is tailored to local context. The exact set of conditions that will be assessed as part of Y-Check will be adapted based on burden of disease, and availability of local tests and referral services.                                                                                                                                                                                                                                                                                                                                          |
| <b>Modifications</b>      |                                                                                                                                                                                                                                                                                                                                                                                                                                                                                                                                                                                |

1  
2  
3  
4  
5  
6  
7  
8  
9  
10  
11  
12  
13  
14  
15  
16  
17  
18  
19  
20  
21  
22  
23  
24  
25  
26  
27  
28  
29  
30  
31  
32  
33  
34  
35  
36  
37  
38  
39  
40  
41  
42  
43  
44  
45  
46  
47  
48  
49  
50  
51  
52  
53  
54  
55  
56  
57  
58  
59  
60

| Item             | Item                                                                                                                                                   |
|------------------|--------------------------------------------------------------------------------------------------------------------------------------------------------|
| 10               | Any modifications will be reported in the article reporting the results of the study.                                                                  |
| <b>How well?</b> |                                                                                                                                                        |
| 11               | Intervention fidelity (adherence, integrity, quality) will be evaluated through a process evaluation including youth-friendly health services quality. |
| 12               | Intervention fidelity will be reported in the article reporting the results of the study.                                                              |

For peer review only

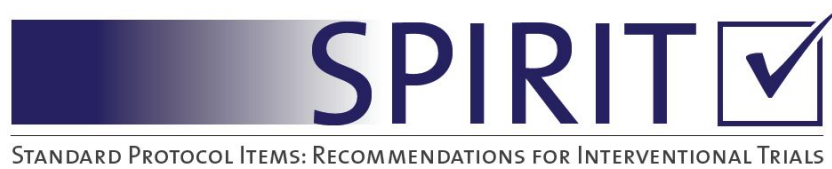

SPIRIT 2013 Checklist: Recommended items to address in a clinical trial protocol and related documents\*

| Section/item                      | Item No | Description                                                                                                                                                                                                         |
|-----------------------------------|---------|---------------------------------------------------------------------------------------------------------------------------------------------------------------------------------------------------------------------|
| <b>Administrative information</b> |         |                                                                                                                                                                                                                     |
| Title                             | 1       | A hybrid evaluation of implementation and short-term cost-effectiveness of Y-Check, an adolescent health and wellbeing check-up programme in three African cities                                                   |
| Trial registration                | 2a      | Registration Protocol ID WHO/ERC.0003778 28/08/2023                                                                                                                                                                 |
|                                   | 2b      | ClinicalTrials.gov Identifier: NCT06090006                                                                                                                                                                          |
| Protocol version                  | 3       | January 10 2023, Version 4                                                                                                                                                                                          |
| Funding                           | 4       | World Health Organization, Botnar Foundation, UKRI, University of Ghana, Biomedical Research Training Institute Zimbabwe, Mwanza Intervention Trials Unit, Tanzania, London School of Hygiene and Tropical Medicine |

## Roles and responsibilities

5a

| Name of collaborator              | Institute and contact details                                                                                                                                                                                                                                                              |
|-----------------------------------|--------------------------------------------------------------------------------------------------------------------------------------------------------------------------------------------------------------------------------------------------------------------------------------------|
| Perna Banati (Chief investigator) | Research Scientist<br>World Health Organization<br>Ave Appia 20,<br>1211 Geneva, Switzerland                                                                                                                                                                                               |
| Valentina Baltag (co-PI)          | Team lead<br>AYH, MCA<br>World Health Organization<br>Ave Appia 20,<br>1211 Geneva, Switzerland                                                                                                                                                                                            |
| Aoife Doyle (PI Zimbabwe)         | Associate Professor<br>Biomedical Research and Training Institute, Harare, Zimbabwe<br>and<br>MRC International Statistics & Epidemiology Group<br>Department of Infectious Disease Epidemiology and International Health<br>London School of Hygiene & Tropical Medicine<br>Keppel Street |
| Rashida Ferrand (co-PI)           | Professor<br>Biomedical Research and Training Institute, Harare, Zimbabwe<br>and<br>Department of Clinical Research<br>London School of Hygiene & Tropical Medicine<br>Keppel Street                                                                                                       |
| Saidi Kapiga (PI Tanzania)        | Professor<br>Mwanza Intervention Trials Unit,<br>National Institute for Medical Research,<br>Isamilo Road, Mwanza, Tanzania                                                                                                                                                                |
| Helen Weiss (co-PI)               | Professor<br>MRC International Statistics & Epidemiology Group<br>Department of Infectious Disease Epidemiology and International Health<br>London School of Hygiene & Tropical Medicine<br>Keppel Street                                                                                  |
| Benedict Weobong (PI Ghana)       | Lecturer<br>School of Public Health, University of Ghana                                                                                                                                                                                                                                   |
| David Ross (Co-I)                 | Honorary Professor<br>Institute of Life course studies<br>Stellenbosch University<br>Stellenbosch South Africa                                                                                                                                                                             |
| Mussa Nsanya (co-I)               | <i>Research Scientist</i> ,<br>Mwanza Intervention Trials Unit,<br>National Institute for Medical Research,<br>Isamilo Road, Mwanza, Tanzania                                                                                                                                              |
| Gerry Mshana (co-I)               | Principal Research Scientist,<br>Mwanza Intervention Trials Unit, National Institute for Medical Research, Isamilo Road, Mwanza, Tanzania                                                                                                                                                  |
| Yovitha Sedekia (co-I)            | Post-doctoral Fellow,<br>Mwanza Intervention Trials Unit, National Institute for Medical Research, Isamilo Road, Mwanza, Tanzania                                                                                                                                                          |
| Chido Dziva Chikwari (co-I)       | Biomedical Research and Training Institute, Harare, Zimbabwe<br>and<br>Department of Infectious Disease Epidemiology and International Health<br>London School of Hygiene & Tropical Medicine<br>Keppel Street                                                                             |
| Salome Manyau (co-I)              | Biomedical Research and Training Institute, Harare, Zimbabwe                                                                                                                                                                                                                               |
| Farirai Nzvere (co-I)             | Research Manager<br>Biomedical Research and Training Institute, Harare, Zimbabwe                                                                                                                                                                                                           |
| Franklin Glozah (co-I)            | Research Scientist<br>School of Public Health, University of Ghana                                                                                                                                                                                                                         |
| Philip Adongo (co-I)              | Professor<br>School of Public Health, University of Ghana                                                                                                                                                                                                                                  |
| Eric Koka (co-I)                  | Research Scientist<br>University of Cape Coast<br>Ghana                                                                                                                                                                                                                                    |
| Evans Agbeno (co-I)               | Research Scientist<br>University of Cape Coast<br>Ghana                                                                                                                                                                                                                                    |
| Kenneth Addo (Program manager)    | Research manager<br>School of Public Health, University of Ghana                                                                                                                                                                                                                           |
| Hannah Taylor-Abdulai (co-I)      | University of Cape Coast<br>Ghana                                                                                                                                                                                                                                                          |
| Giulia Greco (co-I)               | <i>Assistant Professor in Economics</i><br>Department of Global Health and Development<br>London School of Hygiene & Tropical Medicine<br>Keppel Street<br>London WC1E 7HT, UK                                                                                                             |
| Constance Mackworth-Young (co-I)  | <i>Assistant Professor</i><br>Biomedical Research and Training Institute, Harare, Zimbabwe<br>and<br>Department of Global Health and Development<br>Faculty of Public Health and Policy<br>London School of Hygiene & Tropical Medicine<br>Keppel Street<br>London WC1E 7HT, UK            |
| Victoria Simms (co-I)             | Biomedical Research and Training Institute, Harare, Zimbabwe<br>and<br>MRC International Statistics & Epidemiology Group<br>Department of Infectious Disease Epidemiology and International Health<br>London School of Hygiene & Tropical Medicine<br>Keppel Street<br>London WC1E 7HT, UK |

- 1  
2  
3  
4  
5  
6  
7  
8  
9  
10  
11  
12  
13  
14  
15  
16  
17  
18  
19  
20  
21  
22  
23  
24  
25  
26  
27  
28  
29  
30  
31  
32  
33  
34  
35  
36  
37  
38  
39  
40  
41  
42  
43  
44  
45  
46  
47  
48  
49  
50  
51  
52  
53  
54  
55  
56  
57  
58  
59  
60
- 5b World Health Organization (Study sponsor), Ave Appia 20, 1211 Geneva Switzerland
- 5c Study sponsor provides country coordination, oversight and quality control of study design, data collection, management, analysis, and interpretation; writing of the report
- 5d **Coordinating center** (WHO) provides country coordination, oversight and quality control of study design, data collection, management, analysis, and interpretation, writing of the report. **Implementing centers** (BRTI, MITU, UGSPH) are responsible for identification, recruitment, data collection and completion of national ethical protocols, along with follow up of study participants and adherence to study protocol. **Programme Advisory Committee (independent)** provides research advise and review of technical and scientific aspects to the research, review and comment on papers; provide recommendations for uptake of results. **Data Safety Monitoring Board (DSMB) (independent)** monitors evidence for harm, assess the impact and relevance of external evidence, assess whether study follow up should be stopped earlier, assess data quality, monitor recruitment figures and sample size, consider ethical implications, advise on modifications as needed.



## Background and rationale

6a

To develop and implement a potentially sustainable adolescent health check-up programme in three African cities (Cape Coast, Ghana; Mwanza, Tanzania; Chitungwiza, Zimbabwe) and evaluate the acceptability, feasibility, short-term effects, and cost-effectiveness of the programme to improve adolescents' health and well-being. Systematic reviews have identified individual interventions that are effective at improving various aspects of adolescent health and/or well-being. However, most adolescents only come in contact with health services when they are ill, and services are not always appropriate for their needs. This represents a missed opportunity for early detection of health problems and for health promotion, and for the development of beneficial health-seeking behaviours. Early and sustained engagement with health and social services could reap a triple dividend for human development by improving the health and well-being of adolescents, their health and well-being in adulthood and the health and well-being of their future offspring.

Routine health and well-being check-up visits for adolescents which screen for multiple conditions and risk behaviours, could provide an entry point into services and be highly cost-effective but there is little empirical evidence for their feasibility, acceptability and effects. Many high-income countries have national recommendations related to adolescent health check-ups (largely based on expert opinion). In low- and middle-income settings, preventive health services for adolescents are largely provided in schools, are usually limited to deworming and vaccination campaigns, and do not address other important conditions and risk factors such as nutrition, mental health, or disability. Obtaining evidence on check-ups is a high World Health Organization (WHO) priority for adolescent health research so that they can advise governments on whether or not to start, or to strengthen existing health and well-being check-ups during adolescence and, if so, to develop recommendations for the content and method of delivery of these preventive and promotive contacts.

6b

In our study sites, a contemporaneous comparison group is not required since no routine screening is currently taking place, and as a result, assessments at baseline will serve as the counterfactual for internal comparisons. Similarly, since there is no routine screening and treatment provided to adolescents of the target ages in the study population, a before-after comparison is appropriate since it is plausible to assume that reductions in the prevalence of the chronic conditions between the original Y-Check visit and the follow-up at four months will be due to the interventions provided through Y-Check.

- 1  
2  
3  
4  
5  
6  
7  
8  
9  
10  
11  
12  
13  
14  
15  
16  
17  
18  
19  
20  
21  
22  
23  
24  
25  
26  
27  
28  
29  
30  
31  
32
- Objectives 7
- (1) To develop and pilot test a check-up programme for adolescents that screens for important preventable and treatable health conditions using accurate and acceptable screening tests and provides locally accessible effective interventions.
- (2) Through a prospective intervention study in selected schools and communities to: Estimate short-term impacts on adolescent health and wellbeing outcomes: clinical outcomes, health-related knowledge and behaviours, intentions, agency, and perceived social support for behaviour change; engagement with health services, Understand, through process evaluation, the feasibility and fidelity of implementation, the acceptability and uptake, and the influence of context. Estimate the cost-effectiveness of the programme in reducing overall disease burden and improving adolescent wellbeing.
- (3) Obtain information on key parameters needed for the planning of an evaluation study: prevalence of health conditions and behaviours, acceptability of referral, feasibility of following-up programme participants and delivering quality follow-up care, initial estimates of the impact of the programme on longer-term health, educational and wellbeing outcomes based on the short-term implementation and effectiveness outcomes observed in this phase of the research programme, and factors related to the optimal implementation of the Y-Check intervention.
- (4) To refine the programme and its theory of change, and finalise optimal methods for the measurement of the impact of the programme in future studies.

33  
34  
35  
36  
37  
38  
39  
40  
41  
42  
43  
44  
45  
46  
47  
48  
49

Trial design 8

In this study we propose to conduct implementation science studies to rigorously evaluate the check-ups in real life. We will not conduct a randomized controlled trial (RCT) because the logical next step is to check that it is really feasible and acceptable to deliver the intervention in real life before embarking on a large-scale RCT. As a result, no control group is proposed in this protocol. However, we will include a pilot implementation research study of the intervention that could be tested in the future that will establish the frequency of key health and behavioural outcomes and their short-term impact after 4 months on the health and well-being of the adolescents receiving the intervention through a before-after comparison. We will also use the opportunity to design and pilot test the creation of a Digital Adolescent Health and Well-being Club by recruiting adolescents into the club during the Y-Check screenings.

50  
51  
52  
53  
54  
55  
56  
57  
58  
59  
60

**Methods: Participants, interventions, and outcomes**

## Study setting

9

**Ghana:** Cape Coast Metropolis has a total population of 169,894 with three-quarters of the households residing in urban areas. The population in the age group 11-24 years has a literacy rate of about 97%. In 2016 in Cape Coast, 11,233 (68.8%) of 12-14 year-olds were enrolled in junior high schools while 8,407 (91.6%) of 15-17 year-olds were enrolled in senior high schools. Primary and secondary net enrolment rates in 2018 were 84% and 58%, respectively. There are 36 health facilities (26 public and 10 private), including a regional hospital that serves as a secondary referral facility. In the formative phase of Y-Check four communities (Abura, Efutu, Akon, and Kwaprow) within the Cape Coast metropolitan area were involved. Abura and Kwaprow are relatively affluent communities with trading being the main source of livelihood. Akon and Effutu are relatively poorer communities where fishing and farming dominate economic activity, respectively. A total of 172 participants were involved in the study: 16 Key Informants (10 male); 41 younger adolescents (in one school, 11 students were selected (one additional girl in 8th year participated) (mean age: 12 years; 21 female) and their parents; and 37 older adolescents (mean age: 16 years; 22 female) and their parents. For this phase of Y-Check, the study will be conducted in 8 schools within the catchment area of health facilities in all the four communities in the first phase. **Tanzania:** Mwanza is the second largest city in Tanzania after the commercial city of Dar es Salaam. It is located on the southern shores of Lake Victoria in North-western (NW) Tanzania. It has a population of over 900,000 with an annual growth rate of 3%. The primary traditional economic activities include fishing and industrial fish processing for export markets, subsistence agriculture and large and small-scale mining of gold and diamond. Adolescents aged 10 to 19 years make up 24.2% of the total population. As of 2020, gross primary and secondary school enrolment stood at 96.9% and 31.4% respectively. Available public health services include 26 dispensaries, 5 health centres, 2 district hospitals, 1 regional hospital and 1 tertiary/teaching hospital. This study will be conducted in 4 – 6 purposive selected communities and in up to 8 primary schools and 8 secondary schools within the catchment area of health facilities serving the selected communities in the two districts (Nyamagana and Ilemela) within Mwanza city. **Zimbabwe:** Chitungwiza is the third largest city in Zimbabwe, located approximately 25km south of the capital city, Harare, and has a population of about 456 000. The houses are mostly high-density, single story, detached units with small yards that are generally used for growing vegetables. Most of the people work in Harare, as there is little industry in Chitungwiza. There is one tertiary hospital, 4 public primary healthcare facilities, 20 private medical facilities, and 34 government primary schools (all mixed sex). Four communities and four schools were chosen by Chitungwiza stakeholders to take part in the Y-Check Phase 1 formative work in 2019/20 (High schools: Seke High 6, Zengeza High 1; Primary schools: Dungwiza Primary, Chinembiri Primary). Communities and schools were selected to represent the diversity of wards in the town and took into account economic disparities. The selection of the schools and communities for this study will be conducted in collaboration with stakeholders including MoPSE, MoHCC, and the study Youth Advisory Group (YAG) taking into consideration previous participation in the formative work and the location of other ongoing projects. We will aim to work in four distinct communities which are representative of the urban, peri-urban and rural populations of Chitungwiza. Potentially eligible schools must meet the following criteria: Student population of at least 200 learners in Grade 6 or at least 75 learners in Form 5, and located in or close to one of the selected study communities.

1  
2 Eligibility criteria 10 To be included in the study, adolescents aged 10-19 must fall into one  
3 of the following categories:  
4  
5  
6 1) Be attending selected classes of Year 5 of primary school in Mwanza  
7 (median age 11 years); Grade 5/6 of primary school in Chitungwiza (median  
8 age 11 years); or Year 1 of Junior Secondary School in Cape Coast (median  
9 age 12 years) OR  
10  
11 2) Be attending selected classes in Year 3 of Secondary School in Mwanza  
12 (median age 17 years), Form 3/4 in Chitungwiza (median age 17 years), or  
13 Year 2 of Senior Secondary School in Cape Coast (median age 16 years)  
14 OR  
15  
16 3) Be resident in a selected community during the time of the Y-Check  
17 intervention, and be aged 16-19 years  
18  
19 AND  
20  
21 4) Have a completed and signed Informed Consent form, or a signed  
22 Informed Assent Form and signed Parental/Guardian Informed Consent  
23 Form if the adolescent is seen in the community and is below the national  
24 age of consent or is seen in a school, irrespective of their age.  
25  
26  
27

28 Interventions 11a Y-Check is a novel intervention delivering an adolescent friendly health and  
29 wellbeing check-up and where indicated will provide on-the-spot care and/or  
30 referral for common conditions on two occasions in adolescence (in young  
31 adolescents (10-14 year-olds) – soon after the onset of puberty - and in older  
32 adolescents (15-19 year-olds) – when many adolescents become, or are  
33 soon to become, sexually active). The intervention will be customised to  
34 national and local context. Adolescents will only be screened for conditions  
35 that have an accurate, low-cost, acceptable screening test and a locally  
36 accessible, effective intervention. The conditions selected for screening will  
37 be chosen to reflect the local epidemiological contexts (e.g. screening for  
38 malaria will only take place in malaria endemic areas). It will also provide  
39 health promotion information and materials to support positive behaviours  
40 and healthy lifestyles during adolescence and beyond. Respecting specific  
41 requests from the Ministries of Education in all three cities, the study will only  
42 include sexual and reproductive health screening and services at the  
43 community sites (which only include older adolescents). Locally accessible  
44 services will be identified and assessed in terms of their ability to provide the  
45 services recommended by local and WHO guidelines, willingness to accept  
46 referred adolescents, and the fees charged to the project will be negotiated  
47 by the research team for services provided to referred adolescents (where  
48 adequate services are not covered by national health insurance schemes,  
49 free NGO services or free public health care).  
50  
51  
52  
53  
54  
55  
56  
57  
58  
59  
60

- 1  
2  
3  
4  
5  
6  
7  
8  
9
- 10  
11  
12  
13  
14  
15  
16  
17  
18  
19  
20  
21  
22  
23  
24  
25  
26  
27  
28  
29  
30  
31  
32  
33  
34  
35  
36  
37  
38  
39  
40  
41  
42  
43  
44  
45  
46  
47  
48  
49  
50  
51  
52  
53  
54  
55  
56  
57  
58  
59  
60
- 11b The consent form identifies the process for withdrawing from the study. If a participant withdraws from the research study and does not consent to further use of their data, we will remove their records from future use to the fullest extent this is possible. As all tests and procedures follow WHO or accredited national guidelines, these will be used as the basis for adaptation, discontinuing or modifying the diagnosis, treatment or care protocols for specific conditions. If urgent care is required during the course of the Y-Check up, they will be supported to attend a local health facility.
- 11c As for any health care, the tests and treatment provided can have side-effects that can be serious or minor. The tests could cause anxiety. The blood test could cause discomfort or a small bruise, as with any other blood test. While the possibility of this happening is low, the informed consent and assent forms will specify these risks clearly to make sure that participants are aware of the possibility. In the unlikely case of an adverse event, the team will be trained to provide care and support, as well as notify the relevant school authorities (for those seen in schools). If urgent care is required, they will be supported to attend a local health facility. Risks will be minimized by explaining the procedures in detail to adolescents during the school sessions, as well as during the process of obtaining informed consent in schools and community venues. Staff will be trained to detect adverse events and a protocol will be in place to ensure action in the rare case that such an event occurs. Table 3 defines the reporting schedule of adverse events. The use of a digital questionnaire is convenient and has the advantage of providing anonymity; however, adolescents may have fears over unauthorised access and trust. There is also a risk to participants of a breach of confidentiality and possible rejection and discrimination by friends and family if they test positive for any of these conditions. The study team will put in place procedures to minimize these risks. The Y-Check team will be trained in good clinical practice, data protection and confidentiality, and counselling for participants testing positive for any previously mentioned conditions.
- 11d There are no prohibitions during the trial period.
- Outcomes 12 The primary outcome will be the proportion of those screening positive for at least one condition who receive appropriate on-the-spot care or complete appropriate referral for all identified conditions within 4 months. This will be measured using data collected at the initial check-up visit and through recovery of referral vouchers given to participants to allow them to access referral services for free during the 4-months after the Y-Check screening. Completed referral is defined as attending at least the first referral appointment.
- Secondary implementation outcomes will include the proportion of those screening positive for each condition who receive appropriate on-the-spot care or complete appropriate referral for that condition within 4 months, the yield of previously untreated conditions, clinical outcomes at 4 months among those who had originally screened positive for each condition, and intervention acceptability, adoption, appropriateness, feasibility, fidelity and cost. Secondary effectiveness outcomes will include knowledge about health services and health behaviours, self-reported agency and self-efficacy to make decisions about their health, self-reported health-related risk and protective behaviours, reported engagement with health services, wellbeing, self-esteem and quality of life, clinical outcomes, and educational outcomes, which will be collected within the Y-Check and follow-up visits. The short-term cost-effectiveness of the intervention will be estimated (calculated by a comparison of the costs of the intervention against the primary and secondary outcomes and including short-term changes in self-reported quality of life).

Participant timeline

13

| Activity                                   | 2021 |   | 2022 |   | 2023 |   |   |   | 2024 |   |   |   | 2025 |   |
|--------------------------------------------|------|---|------|---|------|---|---|---|------|---|---|---|------|---|
|                                            | Q    | Q | Q    | Q | Q    | Q | Q | Q | Q    | Q | Q | Q | Q    | Q |
|                                            | 3    | 4 | 3    | 4 | 1    | 2 | 3 | 4 | 1    | 2 | 3 | 4 | 1    | 2 |
| Inception                                  | *    | * |      |   |      |   |   |   |      |   |   |   |      |   |
| Intervention development and pilot testing |      |   | *    | * | *    |   |   |   |      |   |   |   |      |   |
| Implementation of Y-Check                  |      |   |      |   | *    | * |   |   |      |   |   |   |      |   |
| Research cohort recruitment                |      |   |      |   | *    | * |   |   |      |   |   |   |      |   |
| Follow-up at 4 months                      |      |   |      |   |      |   | * |   |      |   |   |   |      |   |
| Process and economic evaluation            |      |   |      |   |      |   |   |   | *    | * |   |   |      |   |
| Analysis, reporting and dissemination      |      |   |      |   |      |   |   |   |      | * | * | * | *    | * |

\*Study timeline for Zimbabwe.

Sample size

14

The package will be delivered to 2000 adolescents (500 per gender in each age group), however, the primary outcome is only measured among those who screen positive for at least one condition. Within one age group and gender, if 150 (30%) of 500 participants screen positive for at least one condition, and 75% of those who screen positive are correctly managed (n=112; primary outcome), the 95%CI for correct management will be +/- 7%.

The sample size also allows us to describe prevalence of individual conditions, and proportion with corrective action taken (secondary outcomes). For example, if 50 of 1000 participants in one age group (5%) screen positive for a given condition, and 75% of these have complete referral, the 95%CI will be 62%-87%, or a 95%CI of 35%-65% if 50% complete referral.

Recruitment

15

Participants recruited in schools will be reached through whole school sessions, as well as parent sessions. Participants recruited in communities will be reached through door to door community outreach as well as community meetings.

**Methods: Assignment of interventions (for controlled trials)**

Allocation:

Sequence generation

16a NA

|    |                |     |    |
|----|----------------|-----|----|
| 1  |                |     |    |
| 2  | Allocation     | 16b | NA |
| 3  | concealment    |     |    |
| 4  | mechanism      |     |    |
| 5  | Implementation | 16c | NA |
| 6  |                |     |    |
| 7  | Blinding       | 17a | NA |
| 8  | (masking)      |     |    |
| 9  |                |     |    |
| 10 |                | 17b | NA |
| 11 |                |     |    |

**Methods: Data collection, management, and analysis**

For peer review only

1  
2  
3  
4  
5  
6  
7  
8  
9  
10  
11  
12  
13  
14  
15  
16  
17  
18  
19  
20  
21  
22  
23  
24  
25  
26  
27  
28  
29  
30  
31  
32  
33  
34  
35  
36  
37  
38  
39  
40  
41  
42  
43  
44  
45  
46  
47  
48  
49  
50  
51  
52  
53  
54  
55  
56  
57  
58  
59  
60

Data collection  
methods

18a

The data collection and entry processes will be as detailed in Standard Operating Procedures. We will use Open Data Kit (ODK) and the bespoke Y-Check application for electronic capture of quantitative data into custom-designed forms with built-in range, consistency and discrepancy checks. Answers to sensitive questions will be entered by adolescents themselves to reduce social desirability bias. Field supervisors will scan at least 10% of all forms within 48 hours of data collection to check that there are no obvious problems. They will initiate appropriate actions if there are, such as discussing this at the weekly meetings with the field teams, meeting with individual team members, or arranging specific refresher training. In addition, the data management team will continuously monitor the quality of the data through running frequency distributions of the results for each variable in order to identify unlikely patterns and outliers, and these results will be discussed at the weekly field team meetings. Tablets will be password protected and personal identifiers will be stored in an encrypted format. Service use will also be captured in paper logbooks and registers designed for the specific care and prevention services provided. In each case a log will be kept of the number of people reached, products used, tests performed, etc. Logbook data will be entered on to computers on a weekly basis on pre-designed forms.

De-identified field notes, team debriefing summaries, and outputs from Participatory Action Research (i.e. pictures from mapping, scoring and ranking activities) will be stored electronically in password-protected files. Audio recordings of discussions and interviews will be transcribed verbatim or summarised in detail and then translated (if necessary) into English for analysis by the research team and stored electronically in password-protected files. Each transcript will also have an accompanying summary form capturing details of the data collection and basic demographic details of the interviewee, as well as any pertinent issues related to the data collection session. Verbatim quotations may be included in reports or publications, but will only report the category of participant, their sex and age. De-identified routine health facility data on the uptake of health services by adolescents before, during and after the Y-Check implementation period will be collected. One of the senior social scientists on each of the three country teams will sit in on an average of at least 5% of the interviews, workshops etc, with a higher proportion early in the data collection to ensure quality and to provide feedback to the field researchers. We will also aim that one of the senior social scientists on each of the three country teams will review all qualitative transcripts and summaries within a fortnight of them having been collected so that problems related to how the interviews, participatory workshops, etc have been conducted or recorded/summarized will be identified and the opportunity taken for mentorship to happen.

For both quantitative and qualitative data, a major method that we will use to ensure data quality is that the data will be reviewed in real time as they are collected and will not be allowed to accumulate un-reviewed. This should allow problems and inconsistencies to be detected and appropriate steps taken to correct errors early in the data collection process.



1  
2  
3  
4  
5  
6  
7  
8  
9  
10  
11  
12  
13  
14  
15  
16  
17  
18  
19  
20  
21  
22  
23  
24  
25  
26  
27  
28  
29  
30  
31  
32  
33  
34  
35  
36  
37  
38  
39  
40  
41  
42  
43  
44  
45  
46  
47  
48  
49  
50  
51  
52  
53  
54  
55  
56  
57  
58  
59  
60Data  
management

- 18b Children in schools will be followed up through continued engagement with the schools. In communities, follow-up will be via phone numbers and addresses provided at the check-up visit. Data on many secondary outcomes will be missing for those lost to follow-up. However, socio-demographic data and primary outcome data will be available for those who are lost to follow-up and can be used to assess potential biases in secondary outcomes due to lost to follow-up.
- 19 Data collected off-line on tablet computers will later be synchronised over a local research wi-fi network to the ODK server. Any data transfer over wireless or mobile networks will use Virtual Private Networks or router protected dedicated internet protocol addresses. Data will be fully encrypted to comply with general data protection regulation (GDPR) standards, using a public and private key for encryption and decryption, respectively. All electronic data will be stored in password-protected database systems, with access granted to authorised staff only. When necessary, subsets of the redacted database or other data files may be stored on the PI's or senior staff's laptop to permit analyses during visits or travel. Laptop storage will be encrypted and password-protected to protect data from unauthorised access. Data transferred to LSHTM and/or WHO will be held on Secure Servers utilizing storage systems that provides access controls, integrity verification, encryption, automated daily backup and other functionality to ensure data authenticity and security. While records will not be collected on paper, in some situations (loss of wifi) this might be necessary. Paper records will be stored within the PI or Senior staff's office under lock and key, with access granted only to authorized staff. All data will be stored in multiple secure locations to guard against data loss, and will be stored in date-stamped folders to allow reconstruction of datasets from earlier versions in the unlikely event of a later file becoming corrupted.

view only

1  
2  
3  
4  
5  
6  
7  
8  
9  
10  
11  
12  
13  
14  
15  
16  
17  
18  
19  
20  
21  
22  
23  
24  
25  
26  
27  
28  
29  
30  
31  
32  
33  
34  
35  
36  
37  
38  
39  
40  
41  
42  
43  
44  
45  
46  
47  
48  
49  
50  
51  
52  
53  
54  
55  
56  
57  
58  
59  
60

Statistical methods

20a All primary analyses will be conducted separately by study city; Cape Coast, Chitungwiza and Mwanza. Where comparable, secondary analyses will be conducted with the data from all three cities combined.

**Validation study**

Data will be analysed to calculate the following measures: sensitivity, specificity, positive predictive value, negative predictive value.

**Programmatic data**

Quantitative programmatic data including screening tests results, services delivered, and referrals made and completed will be described according to age, sex, and location.

**Prospective intervention study**

We will follow the STROBE guidelines for the reporting of cohort studies. We will create a flowchart showing the number of communities and schools and the number of participants per community and school at each contact point in the cohort study. We will use descriptive analysis to compare the community-level and school-level characteristics of the study communities and schools.

The primary outcome is a single proportion which will be presented with a 95% confidence interval for each of the 4 target populations: 10-14 year old male, 10-14 year old female, 15-19 year old male, 15-19 year old female. Secondary outcomes which are measured at a single time point will be presented in a similar way. For outcomes which are measured at two or more time-points, a before-after analysis will be conducted comparing differences in measures between the two time-points. The unit of analysis will be the individual. For clinical outcomes which are measured at two or more time-points, the initial check-up visit (baseline) will give the prevalence of undiagnosed and untreated chronic conditions which will represent the counterfactual. The proportion of undiagnosed and untreated chronic conditions at the 4-month follow-up visit will be formally compared to this counterfactual to estimate the effects of the intervention in improving these clinical outcomes. We will assess health service and client determinants of correct management of conditions at 4 months using multivariable regression. A statistical analysis plan is available.

20b All analyses will be disaggregated by age and gender.

20c NA

**Methods: Monitoring**

|    |                                 |     |                                                                                                                                                                                                                                                                                                                                                                                                                                                                                                                                                                                                                                           |
|----|---------------------------------|-----|-------------------------------------------------------------------------------------------------------------------------------------------------------------------------------------------------------------------------------------------------------------------------------------------------------------------------------------------------------------------------------------------------------------------------------------------------------------------------------------------------------------------------------------------------------------------------------------------------------------------------------------------|
| 1  |                                 |     |                                                                                                                                                                                                                                                                                                                                                                                                                                                                                                                                                                                                                                           |
| 2  | Data monitoring                 | 21a | The Data Safety Monitoring Board (DSMB) members will receive and review information on the progress and accruing data of this study. The DSMB should inform the Chair of the PAC if, in their view the results are likely to convince a broad range of clinicians, including those supporting the study and the general clinical community, that, on balance, provision of the Y-Check service is contraindicated for all participants or a particular category of participants, and there was a reasonable expectation that this new evidence would materially influence patient management. The members of the DSMB for this study are: |
| 3  |                                 |     |                                                                                                                                                                                                                                                                                                                                                                                                                                                                                                                                                                                                                                           |
| 4  |                                 |     |                                                                                                                                                                                                                                                                                                                                                                                                                                                                                                                                                                                                                                           |
| 5  |                                 |     |                                                                                                                                                                                                                                                                                                                                                                                                                                                                                                                                                                                                                                           |
| 6  |                                 |     |                                                                                                                                                                                                                                                                                                                                                                                                                                                                                                                                                                                                                                           |
| 7  |                                 |     |                                                                                                                                                                                                                                                                                                                                                                                                                                                                                                                                                                                                                                           |
| 8  |                                 |     |                                                                                                                                                                                                                                                                                                                                                                                                                                                                                                                                                                                                                                           |
| 9  |                                 |     |                                                                                                                                                                                                                                                                                                                                                                                                                                                                                                                                                                                                                                           |
| 10 |                                 |     | 1. Prof Fred Binka, Professor of Clinical Epidemiology, School of Public Health, University of Health and Allied Sciences, Ho, Ghana. Chair, Clinician                                                                                                                                                                                                                                                                                                                                                                                                                                                                                    |
| 11 |                                 |     | 2. Dr Andrew Abassa, Head of Statistics, MRC/UVRI Uganda Research Unit, Entebbe, Uganda. Statistician                                                                                                                                                                                                                                                                                                                                                                                                                                                                                                                                     |
| 12 |                                 |     | 3. Prof David Mabey, Professor, London School of Hygiene and Tropical medicine, Clinician                                                                                                                                                                                                                                                                                                                                                                                                                                                                                                                                                 |
| 13 |                                 |     | 4. Dr Nothando Ngwenya, Head of Social Science and Research Ethics, AHRI, South Africa                                                                                                                                                                                                                                                                                                                                                                                                                                                                                                                                                    |
| 14 |                                 |     |                                                                                                                                                                                                                                                                                                                                                                                                                                                                                                                                                                                                                                           |
| 15 |                                 |     |                                                                                                                                                                                                                                                                                                                                                                                                                                                                                                                                                                                                                                           |
| 16 |                                 |     |                                                                                                                                                                                                                                                                                                                                                                                                                                                                                                                                                                                                                                           |
| 17 |                                 |     |                                                                                                                                                                                                                                                                                                                                                                                                                                                                                                                                                                                                                                           |
| 18 |                                 |     |                                                                                                                                                                                                                                                                                                                                                                                                                                                                                                                                                                                                                                           |
| 19 |                                 | 21b | The DSMB will be notified in the event of any adverse events. Final decision to terminate the study will rest with the study sponsor.                                                                                                                                                                                                                                                                                                                                                                                                                                                                                                     |
| 20 |                                 |     |                                                                                                                                                                                                                                                                                                                                                                                                                                                                                                                                                                                                                                           |
| 21 |                                 |     |                                                                                                                                                                                                                                                                                                                                                                                                                                                                                                                                                                                                                                           |
| 22 | Harms                           | 22  | The DSMB will be notified in the event of any adverse events and make recommendations to the study sponsors.                                                                                                                                                                                                                                                                                                                                                                                                                                                                                                                              |
| 23 |                                 |     |                                                                                                                                                                                                                                                                                                                                                                                                                                                                                                                                                                                                                                           |
| 24 |                                 |     |                                                                                                                                                                                                                                                                                                                                                                                                                                                                                                                                                                                                                                           |
| 25 | Auditing                        | 23  | NA                                                                                                                                                                                                                                                                                                                                                                                                                                                                                                                                                                                                                                        |
| 26 |                                 |     |                                                                                                                                                                                                                                                                                                                                                                                                                                                                                                                                                                                                                                           |
| 27 | <b>Ethics and dissemination</b> |     |                                                                                                                                                                                                                                                                                                                                                                                                                                                                                                                                                                                                                                           |
| 28 |                                 |     |                                                                                                                                                                                                                                                                                                                                                                                                                                                                                                                                                                                                                                           |
| 29 | Research ethics approval        | 24  | Ethical clearance has been received from WHO Registration Protocol ID WHO/ERC.0003778 28/08/2023, from London School of Hygiene and Tropical Medicine Approval numbers 26395 and 28312 and from all country national ethics bodies.                                                                                                                                                                                                                                                                                                                                                                                                       |
| 30 |                                 |     |                                                                                                                                                                                                                                                                                                                                                                                                                                                                                                                                                                                                                                           |
| 31 |                                 |     |                                                                                                                                                                                                                                                                                                                                                                                                                                                                                                                                                                                                                                           |
| 32 |                                 |     |                                                                                                                                                                                                                                                                                                                                                                                                                                                                                                                                                                                                                                           |
| 33 |                                 |     |                                                                                                                                                                                                                                                                                                                                                                                                                                                                                                                                                                                                                                           |
| 34 | Protocol amendments             | 25  | Protocol modifications have been submitted to WHO ethics review committee, LSHTM and national ethics boards and approved by all.                                                                                                                                                                                                                                                                                                                                                                                                                                                                                                          |
| 35 |                                 |     |                                                                                                                                                                                                                                                                                                                                                                                                                                                                                                                                                                                                                                           |
| 36 |                                 |     |                                                                                                                                                                                                                                                                                                                                                                                                                                                                                                                                                                                                                                           |
| 37 |                                 |     |                                                                                                                                                                                                                                                                                                                                                                                                                                                                                                                                                                                                                                           |
| 38 |                                 |     |                                                                                                                                                                                                                                                                                                                                                                                                                                                                                                                                                                                                                                           |
| 39 |                                 |     |                                                                                                                                                                                                                                                                                                                                                                                                                                                                                                                                                                                                                                           |
| 40 |                                 |     |                                                                                                                                                                                                                                                                                                                                                                                                                                                                                                                                                                                                                                           |
| 41 |                                 |     |                                                                                                                                                                                                                                                                                                                                                                                                                                                                                                                                                                                                                                           |
| 42 |                                 |     |                                                                                                                                                                                                                                                                                                                                                                                                                                                                                                                                                                                                                                           |
| 43 |                                 |     |                                                                                                                                                                                                                                                                                                                                                                                                                                                                                                                                                                                                                                           |
| 44 |                                 |     |                                                                                                                                                                                                                                                                                                                                                                                                                                                                                                                                                                                                                                           |
| 45 |                                 |     |                                                                                                                                                                                                                                                                                                                                                                                                                                                                                                                                                                                                                                           |
| 46 |                                 |     |                                                                                                                                                                                                                                                                                                                                                                                                                                                                                                                                                                                                                                           |
| 47 |                                 |     |                                                                                                                                                                                                                                                                                                                                                                                                                                                                                                                                                                                                                                           |
| 48 |                                 |     |                                                                                                                                                                                                                                                                                                                                                                                                                                                                                                                                                                                                                                           |
| 49 |                                 |     |                                                                                                                                                                                                                                                                                                                                                                                                                                                                                                                                                                                                                                           |
| 50 |                                 |     |                                                                                                                                                                                                                                                                                                                                                                                                                                                                                                                                                                                                                                           |
| 51 |                                 |     |                                                                                                                                                                                                                                                                                                                                                                                                                                                                                                                                                                                                                                           |
| 52 |                                 |     |                                                                                                                                                                                                                                                                                                                                                                                                                                                                                                                                                                                                                                           |
| 53 |                                 |     |                                                                                                                                                                                                                                                                                                                                                                                                                                                                                                                                                                                                                                           |
| 54 |                                 |     |                                                                                                                                                                                                                                                                                                                                                                                                                                                                                                                                                                                                                                           |
| 55 |                                 |     |                                                                                                                                                                                                                                                                                                                                                                                                                                                                                                                                                                                                                                           |
| 56 |                                 |     |                                                                                                                                                                                                                                                                                                                                                                                                                                                                                                                                                                                                                                           |
| 57 |                                 |     |                                                                                                                                                                                                                                                                                                                                                                                                                                                                                                                                                                                                                                           |
| 58 |                                 |     |                                                                                                                                                                                                                                                                                                                                                                                                                                                                                                                                                                                                                                           |
| 59 |                                 |     |                                                                                                                                                                                                                                                                                                                                                                                                                                                                                                                                                                                                                                           |
| 60 |                                 |     |                                                                                                                                                                                                                                                                                                                                                                                                                                                                                                                                                                                                                                           |

1  
2 Consent or assent 26a To respect the autonomy of adolescents the decision of the minor should prevail. As  
3 a result, prior to the visit, adolescents will be shared the assent forms. After  
4 adolescents have assented, parents/guardians who would like their adolescent to  
5 receive the check-up will be asked to provide written parent/guardian consent.  
6 On the day of the check-up visit, a verbal confirmation will be requested from the  
7 adolescent. This will be the case for all adolescents taking part in Y-Check in school  
8 settings. In community settings, we can expect older and possibly emancipated  
9 minors to be participants of the Y-Check service. In Ghana and Tanzania where the  
10 age of consent to medical and health-related research is 18 years, adolescents who  
11 are not deemed emancipated minors will provide completed parental consent  
12 forms and provide written assent before proceeding through the check-up visit. In  
13 Zimbabwe where the age of consent to medical and health-related research is 16  
14 years, clients aged 16 years and above who attend the check-ups in the community  
15 venues will be allowed to provide written consent for themselves. Emancipated  
16 minors will be treated as though they were above the nationally-applicable age of  
17 consent. The risks and benefits of the Y-Check intervention will be described to  
18 participants and their parents/guardians during the consent/assent process.  
19 Adolescents receiving parental consent will be informed that their parents will be  
20 notified of test results. Y-Check participants will benefit from early detection of  
21 health problems, health promotion, and the promotion of beneficial health-seeking  
22 behaviours. However, some conditions such as mental health disorders, HIV and  
23 sexually transmitted infections (STIs) are associated with stigma and anxiety. The Y-  
24 Check team will be trained in good clinical practice (GCP), data protection and  
25 confidentiality, and will provide counselling for participants testing positive for any  
26 condition. Furthermore, the protocols and procedures for communicating with  
27 adolescents and their families will be carefully developed in collaboration with the  
28 three Youth Advisory Groups (YAGs)/Community Advisory Board (CAB) and  
29 community stakeholders.

30  
31  
32 26b NA  
33  
34  
35  
36  
37  
38  
39  
40  
41  
42  
43  
44  
45  
46  
47  
48  
49  
50  
51  
52  
53  
54  
55  
56  
57  
58  
59  
60

## Confidentiality

27

The protocol for sharing the results of the screening tests will vary according to the perceived seriousness of the condition and/or the seriousness of any stigma associated with the condition, and the age of the participant. A final decision on the classification of conditions as being either more or less serious or seriously stigmatized will be taken in collaboration with adolescents and stakeholders during Year 1. More serious and/or seriously stigmatised conditions may include HIV, STIs, pregnancy, drug use, excessive alcohol use, experiencing violence, suspected epilepsy, severe depressive or severe anxiety symptoms and serious musculoskeletal disorders. Less serious and/or less seriously stigmatised conditions may include anaemia, overweight, underweight, pre-hypertension, hypertension, mild depressive or mild anxiety symptoms, myopia or a hearing disorder. Adolescents who are of majority age or deemed emancipated minors will be given their results directly at the time of the screening. Although they will be encouraged to disclose and discuss the results with their parents, unless they think this would put themselves at risk, the Y-Check team will not disclose their results to their parents unless the adolescent asks for a joint meeting with their parents to discuss them. For all other cases: 1) in the event that the adolescent has no positive test results nor clinically important findings – a letter will be sent home with the child disclosing this information and encouraging continued healthy behaviours. The adolescent will also receive a one-page summary telling them what has been checked for and that nothing serious has been found. They will be encouraged to continue good health-related behaviours. The letter will remind them about health and well-being services available at the school, local health facilities and in the community. 2) in the event that the adolescent is not diagnosed with any condition that requires follow-up or referral (see below) but is diagnosed with a condition that is relatively minor (such as being overweight but not obese) – a letter will be sent home with the child that discloses the results and provides information that promotes and enables self-management, and encourages assistance from their parents. 3) in the event that the adolescent is not diagnosed with any condition that requires referral (see below) but is diagnosed with a condition that is relatively minor but needs follow-up (such as moderate anaemia) – a letter will be sent home with the child that discloses the results, provides information to the parent, and offers the opportunity for the parent to make an appointment with a member of the Y-Check team for further advice regarding the follow-up that may be required (eg. reassessment of the adolescent's haemoglobin concentration after the three months of iron and folate treatment provided by Y-Check has been completed). 4) in the event that the adolescent is not diagnosed with any condition that requires referral and is stigmatizing (see below) but is diagnosed with a condition that requires referral but is not stigmatizing (such as myopia) – a letter will be sent home with the child that discloses the results and provides information to the parent. The parent will be offered the opportunity to make an appointment to meet with a member of the Y-Check team for further advice regarding the condition and the referral. If the parent does not take up the offer of an appointment, the study team will consult with the adolescent, and – if the adolescent gives their permission - school, health or social care staff before deciding on next steps. Potential action would include contacting the parent by phone or through a home visit. 5) in the event that the adolescent is diagnosed with a condition that is considered to be more serious and/or more seriously stigmatizing (such as HIV or epilepsy) – a letter will be sent home with the child that does not disclose results. Parents will be invited and encouraged to make an appointment with the Y-Check nurse/clinician or counsellor to discuss the adolescent's health. The nurse/clinician or counsellor would then meet with the adolescent and the parent together and would explain the condition or suspected condition and what is being recommended. They will ask for the parent's support to manage the condition and answer any questions and give advice/support as needed. If the parent does not take up the offer of an appointment, the study team will consult with the adolescent, and – if the adolescent gives their permission - school, health or social care staff before deciding on next steps. Potential action would include contacting the parent by phone or through a home visit, and, in emergency situations only, referring the young person to health/social services without the support of the parent.

For Y-Check in community settings, the adolescent will receive the letter directly and will be encouraged to share it with their parents/guardians. For Y-Check in school settings, the letter will be sent from Y-Check via the school to the adolescent's parents. All such letters to parents/guardians will be in sealed envelopes addressed to the "Private and Confidential: to the Parent/Guardian of <name of adolescent. In this study, SRH services are only provided in community settings. In Zimbabwe, community services will be provided to 16-19 year-olds, and adolescents who are 16+ in Zimbabwe are able to consent themselves, and therefore no parental disclosure is required, though we will suggest that adolescents inform their parents if they think that they will be able to provide support. In Ghana and Tanzania, older adolescents (16y+) will be able to access Y-Check in community settings. Unless they are deemed emancipated minors (section 7.5), they will require parental consent. The consent and assent forms note that test results will be disclosed to the parent.

We feel that parents have an important role to play in supporting legal minors, especially after diagnosis of highly stigmatizing conditions, including supporting them emotionally, connecting them with services, treatment or follow-up care. As a result, rather than apply a universal rule for this group, we propose development of a process that respects the best interest of the adolescent, that will enable the clinician to determine the benefits and risks of parental disclosure on a case-by-case basis. We will work during the first part of this study to discuss this with national and international clinicians and researchers as well as global and local ethics boards to determine what is the right course of action.

#### Victims of rape/sexual abuse

In the event that the Y-Check team discovers a case of rape or sexual abuse amongst the participants, the matter shall be referred to the Social Services department. Participants will be told of this legal requirement during the consent procedure so they can decide whether or not they wish to report any such events.

|    |                 |     |                                                                              |
|----|-----------------|-----|------------------------------------------------------------------------------|
| 1  |                 |     |                                                                              |
| 2  | Declaration of  | 28  | The principal investigators have no completing interests.                    |
| 3  | interests       |     |                                                                              |
| 4  | Access to data  | 29  | All PIs and co-investigators will have access to the data. Once the study is |
| 5  |                 |     | completed, all data will be placed into an open access repository.           |
| 6  |                 |     | Data will be deidentified and anonymised to ensure confidentiality and       |
| 7  |                 |     | participant privacy                                                          |
| 8  |                 |     |                                                                              |
| 9  | Ancillary and   | 30  | NA                                                                           |
| 10 | post-trial care |     |                                                                              |
| 11 |                 |     |                                                                              |
| 12 | Dissemination   | 31a | A publications policy has been developed. Results will be published in       |
| 13 | policy          |     | at least 3 country specific peer reviewed journal publications and one       |
| 14 |                 |     | multicountry publication. There will also be videos, briefs, and             |
| 15 |                 |     | webinars to disseminate results.                                             |
| 16 |                 |     |                                                                              |
| 17 |                 | 31b | Topics suggested for presentation or publication will be circulated to       |
| 18 |                 |     | the PIs of the management team, with an abstract, proposed                   |
| 19 |                 |     | authorship and proposed journal. A writing committee will be formed          |
| 20 |                 |     | as described in the publications policy. Disputes regarding authorship       |
| 21 |                 |     | will be settled as per the publication policy, and ultimately by the Lead    |
| 22 |                 |     | PI if required.                                                              |
| 23 |                 |     |                                                                              |
| 24 |                 | 31c | All data will be placed into an open access repository. Data will be         |
| 25 |                 |     | deidentified and anonymised to ensure confidentiality and participant        |
| 26 |                 |     | privacy.                                                                     |
| 27 |                 |     |                                                                              |

## Appendices

|    |                  |    |                                                                                                                                                                                                                                                                                                                                                                                                                                                                                                                                                                                                                                                                                                                                                                                                                                                                                                                                                                               |
|----|------------------|----|-------------------------------------------------------------------------------------------------------------------------------------------------------------------------------------------------------------------------------------------------------------------------------------------------------------------------------------------------------------------------------------------------------------------------------------------------------------------------------------------------------------------------------------------------------------------------------------------------------------------------------------------------------------------------------------------------------------------------------------------------------------------------------------------------------------------------------------------------------------------------------------------------------------------------------------------------------------------------------|
| 28 |                  |    |                                                                                                                                                                                                                                                                                                                                                                                                                                                                                                                                                                                                                                                                                                                                                                                                                                                                                                                                                                               |
| 29 |                  |    |                                                                                                                                                                                                                                                                                                                                                                                                                                                                                                                                                                                                                                                                                                                                                                                                                                                                                                                                                                               |
| 30 | Informed consent | 32 | Attached in the submission to Ethics Review Committee.                                                                                                                                                                                                                                                                                                                                                                                                                                                                                                                                                                                                                                                                                                                                                                                                                                                                                                                        |
| 31 | materials        |    |                                                                                                                                                                                                                                                                                                                                                                                                                                                                                                                                                                                                                                                                                                                                                                                                                                                                                                                                                                               |
| 32 |                  |    |                                                                                                                                                                                                                                                                                                                                                                                                                                                                                                                                                                                                                                                                                                                                                                                                                                                                                                                                                                               |
| 33 | Biological       | 33 | The laboratory tests will be conducted by a trained laboratory technician or                                                                                                                                                                                                                                                                                                                                                                                                                                                                                                                                                                                                                                                                                                                                                                                                                                                                                                  |
| 34 | specimens        |    | laboratory assistant and will include:                                                                                                                                                                                                                                                                                                                                                                                                                                                                                                                                                                                                                                                                                                                                                                                                                                                                                                                                        |
| 35 |                  |    | <ul style="list-style-type: none"> <li>• Anaemia, using haemoglobin measurement</li> <li>• HIV testing for older adolescents using a HIV oral mucosal transudate test with confirmatory blood testing using Rapid Diagnostic Tests</li> <li>• STI testing for the older adolescents using GeneXpert for Chlamydia trachomatis (CT) and Neisseria gonorrhoeae (NG) and a lateral flow assay for trichomonas vaginalis (TV).</li> <li>• In the two cities where the prevalence of malaria is expected to be high (Mwanza and Cape Coast), all participants will be tested for malaria parasites using the rapid diagnostic test that is recommended by the national malaria control programme.</li> <li>• In the two cities where the prevalence of schistosomiasis is thought to be high (Mwanza and Cape Coast), all participants will be asked to provide both a urine specimen that be tested for <i>Schistosoma haematobium</i> and <i>Schistosoma mansoni</i>.</li> </ul> |
| 36 |                  |    |                                                                                                                                                                                                                                                                                                                                                                                                                                                                                                                                                                                                                                                                                                                                                                                                                                                                                                                                                                               |
| 37 |                  |    |                                                                                                                                                                                                                                                                                                                                                                                                                                                                                                                                                                                                                                                                                                                                                                                                                                                                                                                                                                               |
| 38 |                  |    |                                                                                                                                                                                                                                                                                                                                                                                                                                                                                                                                                                                                                                                                                                                                                                                                                                                                                                                                                                               |
| 39 |                  |    |                                                                                                                                                                                                                                                                                                                                                                                                                                                                                                                                                                                                                                                                                                                                                                                                                                                                                                                                                                               |
| 40 |                  |    |                                                                                                                                                                                                                                                                                                                                                                                                                                                                                                                                                                                                                                                                                                                                                                                                                                                                                                                                                                               |
| 41 |                  |    |                                                                                                                                                                                                                                                                                                                                                                                                                                                                                                                                                                                                                                                                                                                                                                                                                                                                                                                                                                               |
| 42 |                  |    |                                                                                                                                                                                                                                                                                                                                                                                                                                                                                                                                                                                                                                                                                                                                                                                                                                                                                                                                                                               |
| 43 |                  |    |                                                                                                                                                                                                                                                                                                                                                                                                                                                                                                                                                                                                                                                                                                                                                                                                                                                                                                                                                                               |
| 44 |                  |    |                                                                                                                                                                                                                                                                                                                                                                                                                                                                                                                                                                                                                                                                                                                                                                                                                                                                                                                                                                               |
| 45 |                  |    |                                                                                                                                                                                                                                                                                                                                                                                                                                                                                                                                                                                                                                                                                                                                                                                                                                                                                                                                                                               |
| 46 |                  |    |                                                                                                                                                                                                                                                                                                                                                                                                                                                                                                                                                                                                                                                                                                                                                                                                                                                                                                                                                                               |
| 47 |                  |    |                                                                                                                                                                                                                                                                                                                                                                                                                                                                                                                                                                                                                                                                                                                                                                                                                                                                                                                                                                               |
| 48 |                  |    |                                                                                                                                                                                                                                                                                                                                                                                                                                                                                                                                                                                                                                                                                                                                                                                                                                                                                                                                                                               |
| 49 |                  |    |                                                                                                                                                                                                                                                                                                                                                                                                                                                                                                                                                                                                                                                                                                                                                                                                                                                                                                                                                                               |
| 50 |                  |    |                                                                                                                                                                                                                                                                                                                                                                                                                                                                                                                                                                                                                                                                                                                                                                                                                                                                                                                                                                               |
| 51 |                  |    |                                                                                                                                                                                                                                                                                                                                                                                                                                                                                                                                                                                                                                                                                                                                                                                                                                                                                                                                                                               |
| 52 |                  |    |                                                                                                                                                                                                                                                                                                                                                                                                                                                                                                                                                                                                                                                                                                                                                                                                                                                                                                                                                                               |
| 53 |                  |    |                                                                                                                                                                                                                                                                                                                                                                                                                                                                                                                                                                                                                                                                                                                                                                                                                                                                                                                                                                               |
| 54 |                  |    |                                                                                                                                                                                                                                                                                                                                                                                                                                                                                                                                                                                                                                                                                                                                                                                                                                                                                                                                                                               |
| 55 |                  |    |                                                                                                                                                                                                                                                                                                                                                                                                                                                                                                                                                                                                                                                                                                                                                                                                                                                                                                                                                                               |
| 56 |                  |    | No samples will be stored. All samples will be destroyed after testing is                                                                                                                                                                                                                                                                                                                                                                                                                                                                                                                                                                                                                                                                                                                                                                                                                                                                                                     |
| 57 |                  |    | completed.                                                                                                                                                                                                                                                                                                                                                                                                                                                                                                                                                                                                                                                                                                                                                                                                                                                                                                                                                                    |
| 58 |                  |    |                                                                                                                                                                                                                                                                                                                                                                                                                                                                                                                                                                                                                                                                                                                                                                                                                                                                                                                                                                               |
| 59 |                  |    |                                                                                                                                                                                                                                                                                                                                                                                                                                                                                                                                                                                                                                                                                                                                                                                                                                                                                                                                                                               |
| 60 |                  |    |                                                                                                                                                                                                                                                                                                                                                                                                                                                                                                                                                                                                                                                                                                                                                                                                                                                                                                                                                                               |

1 \*It is strongly recommended that this checklist be read in conjunction with the SPIRIT 2013  
2 Explanation & Elaboration for important clarification on the items. Amendments to the  
3 protocol should be tracked and dated. The SPIRIT checklist is copyrighted by the SPIRIT  
4 Group under the Creative Commons "[Attribution-NonCommercial-NoDerivs 3.0 Unported](#)"  
5 license.  
6  
7  
8  
9  
10  
11  
12  
13  
14  
15  
16  
17  
18  
19  
20  
21  
22  
23  
24  
25  
26  
27  
28  
29  
30  
31  
32  
33  
34  
35  
36  
37  
38  
39  
40  
41  
42  
43  
44  
45  
46  
47  
48  
49  
50  
51  
52  
53  
54  
55  
56  
57  
58  
59  
60

For peer review only

# BMJ Open

## An adolescent health and wellbeing check-up programme in three African cities (Y-Check): protocol for a multimethod, prospective, hybrid implementation-effectiveness study

|                                 |                                                                                                                                                                                                                                                                                                                                                                                                                                                                                                                                                                                                                                                                                                                                                                                                                                                                                                                                 |
|---------------------------------|---------------------------------------------------------------------------------------------------------------------------------------------------------------------------------------------------------------------------------------------------------------------------------------------------------------------------------------------------------------------------------------------------------------------------------------------------------------------------------------------------------------------------------------------------------------------------------------------------------------------------------------------------------------------------------------------------------------------------------------------------------------------------------------------------------------------------------------------------------------------------------------------------------------------------------|
| Journal:                        | <i>BMJ Open</i>                                                                                                                                                                                                                                                                                                                                                                                                                                                                                                                                                                                                                                                                                                                                                                                                                                                                                                                 |
| Manuscript ID                   | bmjopen-2023-077533.R2                                                                                                                                                                                                                                                                                                                                                                                                                                                                                                                                                                                                                                                                                                                                                                                                                                                                                                          |
| Article Type:                   | Protocol                                                                                                                                                                                                                                                                                                                                                                                                                                                                                                                                                                                                                                                                                                                                                                                                                                                                                                                        |
| Date Submitted by the Author:   | 30-Apr-2024                                                                                                                                                                                                                                                                                                                                                                                                                                                                                                                                                                                                                                                                                                                                                                                                                                                                                                                     |
| Complete List of Authors:       | Banati, Prerna; World Health Organization, Ross, David Anthony; Stellenbosch University Weobong, Benedict; University of Ghana Kapiga, Saidi ; National Institute for Medical Research Mwanza Research Centre; London School of Hygiene & Tropical Medicine Weiss, Helen; London School of Hygiene & Tropical Medicine Baltag , Valentina; World Health Organization Nzvere, Farirai; London School of Hygiene & Tropical Medicine; Biomedical Research and Training Institute Glozah, Franklin; University of Ghana Nsanya, Mussa; National Institute for Medical Research Mwanza Research Centre Greco, Giulia; London School of Hygiene & Tropical Medicine Ferrand, Rashida; London School of Hygiene & Tropical Medicine, Department of Infectious Disease Epidemiology; Biomedical Research and Training Institute Doyle, Aoife; London School of Hygiene & Tropical Medicine; Biomedical Research and Training Institute |
| <b>Primary Subject Heading</b>: | Public health                                                                                                                                                                                                                                                                                                                                                                                                                                                                                                                                                                                                                                                                                                                                                                                                                                                                                                                   |
| Secondary Subject Heading:      | Evidence based practice                                                                                                                                                                                                                                                                                                                                                                                                                                                                                                                                                                                                                                                                                                                                                                                                                                                                                                         |
| Keywords:                       | Adolescent, PUBLIC HEALTH, Mass Screening, Schools                                                                                                                                                                                                                                                                                                                                                                                                                                                                                                                                                                                                                                                                                                                                                                                                                                                                              |
|                                 |                                                                                                                                                                                                                                                                                                                                                                                                                                                                                                                                                                                                                                                                                                                                                                                                                                                                                                                                 |

SCHOLARONE™  
Manuscripts



**An adolescent health and wellbeing check-up programme in three African cities (Y-Check): protocol for a multimethod, prospective, hybrid implementation-effectiveness study**

Banati P, PhD MPH<sup>1\*</sup>, Ross DA, MA, BMBCh, MSc, PhD<sup>2</sup> Weobong B, MSc, PhD<sup>3</sup>, Kapiga S, MD, MPH, ScD<sup>4,5</sup>, Weiss HA PhD MSc<sup>6</sup>, Baltag V MD PhD<sup>1</sup>, Nzvere F<sup>5,7</sup>, Glozah F, MPhil, PhD<sup>3</sup>, Nsanya MK, MD, MSc<sup>4</sup>, Greco G, PhD MSc<sup>5</sup>, Ferrand RA, PhD MBBS<sup>5,7</sup>, and Doyle AM, PhD<sup>6,7</sup> for the Y-Check Research Programme Team<sup>8</sup>

<sup>1</sup> Adolescent and Young Adult Health (AYH) Unit, Maternal, Newborn, Child and Adolescent Health and Ageing (MCA) Department, World Health Organization (WHO), Ave Appia 20, 1211 Geneva 27, Switzerland

<sup>2</sup> Institute for Life Course Health Research, Stellenbosch University, Tygerberg, South Africa

<sup>3</sup> University of Ghana School of Public Health, College of Health Sciences (UGSPH), Ghana

<sup>4</sup> Mwanza Intervention Trials Unit, National Institute for Medical Research Mwanza Research Centre (MITU/NIMR), Isamilo, Mwanza, United Republic of Tanzania

<sup>5</sup> Department of Infectious Disease Epidemiology, London School of Hygiene and Tropical Medicine, Keppel St, London WC1E 7HT, UK

<sup>6</sup> MRC International Statistics and Epidemiology Group, London School of Hygiene & Tropical Medicine, Keppel St, London WC1E 7HT, UK

<sup>7</sup> Biomedical Research and Training Institute (BRTI), 10 Seagrave Road, Avondale, Harare, Zimbabwe

<sup>8</sup> The Y-Check Research Programme Team in alphabetical order includes Prof. Philip B. Adongo, MA, PhD, Department of Social and Behavioural Sciences, School of Public Health, University of Ghana; Mr. Kenneth. S. Adde, MPhil, Department of Population and Health, University of Cape Coast; Prof Evans Agbeno, FGCS, MPH, MBCHB, Department of Obstetrics & Gynaecology, University of Cape Coast; Prof. Patricia Akweongo, MA, PhD, Department of Health Policy Planning and Management, School of Public Health, University of Ghana; Ms Tsitsi Bandason MSc, The Health Research Unit Zimbabwe/ Biomedical Research and Training Institute; Dr. Sarah Bernays, PhD MA, Global Health and Development, London School of Hygiene and Tropical Medicine and School of Public Health, University of Sydney; Dr Rudo Chingono PhD, The Health Research Unit Zimbabwe/ Biomedical Research and Training Institute Dr Chido Dziva Chikwari PhD, MSc, BSc, The Health Research Unit Zimbabwe/ Biomedical Research and Training Institute and MRC International Statistics & Epidemiology Group, Department of Infectious Disease Epidemiology, London School of Hygiene & Tropical Medicine, London, UK; Ms Ethel Dauya MPH, The Health Research Unit Zimbabwe/ Biomedical Research and Training Institute; Dr. S. Derry, PhD, Department of Bio-Statistics, School of Public Health, University of Ghana; Dr. Eric Koka, MPhil, PhD, Department of Sociology and Anthropology, University of Cape Coast; Dr. Constance Mackworth-Young, PhD MSc, Global Health and Development, London School of Hygiene and Tropical Medicine, Ms. Salome Manyau MSc, The Health Research Unit Zimbabwe/ Biomedical Research and Training Institute; Mr. Bernard A. Owusu, MPhil, Department of Population and Health, University of Cape Coast; Dr. Yovitha Sedekia, MPHDC, PhD, Mwanza Intervention Trials Unit (MITU)/National Institute for Medical Research (NIMR); Dr. Hannah Taylor-Abdulai, MPH, MPhil, PhD, Department of Physician Assistant Studies, University of Cape Coast; ; Dr. Mandi Tembo, PhD, The Health Research Unit Zimbabwe/ Biomedical Research and Training Institute and Department of Global Health and Development, Faculty of Public Health and Policy, London School of Hygiene and Tropical Medicine, London, United Kingdom.

\* Corresponding Author

**Email addresses**

Banati P (banatip@who.int); Ross DA (dross.rbridge@gmail.com); Weobong B (bweobong@ug.edu.gh); Kapiga S (Saidi.Kapiga@lshtm.ac.uk); Weiss HA (Helen.Weiss@lshtm.ac.uk); Baltag V (baltagv@who.int); Nzvere F (Farrie.Nzvere@lshtm.ac.uk); Glozah F (fglozah@ug.edu.gh); Nsanya MK (mussa.nsanya@mitu.or.tz); Greco G (Giulia.Greco@lshtm.ac.uk); Ferrand RA (rashida.ferrand@lshtm.ac.uk); Doyle AM (aoife.doyle@lshtm.ac.uk)

1  
2  
3 **48 Article Summary**  
4

5  
6 **49 Abstract**  
7

8  
9 50 Background: During adolescence, behaviours are initiated that will have substantial impacts on the  
10  
11 51 individual's short- and long-term health and wellbeing. However, adolescents rarely have regular contact  
12  
13 52 with health services, and available services are not always appropriate for their needs. We co-developed  
14  
15 53 with adolescents a health and wellbeing check-up programme (Y-Check). This paper describes the  
16  
17 54 methods to evaluate the feasibility, acceptability, short-term effects, and cost-effectiveness of Y-Check in  
18  
19 55 three African cities.  
20  
21

22  
23 56 Method: This is a multi-country prospective intervention study, with a mixed-method process evaluation.  
24

25 57 The intervention involves screening, on-the-spot care and referral of adolescents through health and  
26

27 58 wellbeing check-up visits. In each city, 2000 adolescents will be recruited in schools or community venues.  
28

29 59 Adolescents will be followed-up at 4 months. The study will assess the effects of Y-Check on knowledge  
30

31 60 and behaviours, as well as clinical outcomes and costs. Process and economic evaluations will investigate  
32

33  
34 61 acceptability, feasibility, uptake, fidelity and cost effectiveness.  
35  
36

37 62 Ethics and Dissemination: Approval has been received from the WHO (WHO/ERC Protocol ID Number  
38

39 63 ERC.0003778); Ghana Health Service (Protocol ID number GHS-ERC: 027/07/22), the United Republic of  
40

41 64 Tanzania National Institute for Medical Research (Clearance No. NIMR/HQ/R.8a/Vol.IX/4199), the Medical  
42

43 65 Research Council of Zimbabwe (Approval number MRCZ/A/2766), and the LSHTM (Approval numbers  
44

45 66 26395 and 28312). The trial registration number is NCT06090006. Consent and disclosure are addressed  
46

47 67 in the paper. Results will be published in 3 country-specific peer reviewed journal publications, and one  
48

49 68 multi-country publication; and disseminated through videos, briefs, and webinars. Data will be placed into  
50

51 69 an open access repository. Data will be deidentified and anonymized.  
52  
53  
54

55 70  
56  
57

1  
2  
3  
4  
5  
6  
7  
8  
9  
10  
11  
12  
13  
14  
15  
16  
17  
18  
19  
20  
21  
22  
23  
24  
25  
26  
27  
28  
29  
30  
31  
32  
33  
34  
35  
36  
37  
38  
39  
40  
41  
42  
43  
44  
45  
46  
47  
48  
49  
50  
51  
52  
53  
54  
55  
56  
57  
58  
59  
60

71 **Keywords:** Adolescent, health, wellbeing, check-ups, screening, implementation research, effectiveness,  
72 cost-effectiveness  
73

For peer review only

1  
2  
3 74 **Additional information**  
4

5 75 **Strengths and limitations of the methodology:**  
6

- 7 76 • **Strength:** This study will utilize existing health care infrastructure in low- and middle-income  
8 77 country settings, assessing real world implementation situations and therefore it will be  
9 78 relatively straightforward to directly apply the findings to programs.  
10  
11 79 • **Strength:** This is a relatively large study of 6000 adolescents in 3 countries. The study takes the  
12 80 views of young people centrally into the design of the intervention.  
13 81 • **Limitation:** Although the primary outcome is an implementation science / programmatic  
14 82 outcome, the effectiveness data is based on pre-post comparison.  
15 83 • **Limitation:** This study will have limited ability to assess sustainability of effects over the longer  
16 84 term as the follow up period is 4 months  
17 85 • **Limitation:** This study is operating in three African cities which may limit generalizability to rural  
18 86 areas.  
19 87  
20  
21  
22 88  
23 89  
24 90  
25  
26  
27 91  
28  
29  
30  
31  
32  
33  
34  
35  
36  
37  
38  
39  
40  
41  
42  
43  
44  
45  
46  
47  
48  
49  
50  
51  
52  
53  
54  
55  
56  
57  
58  
59  
60

Manuscript Wordcount: 5023

## 92 **Background**

93 To unlock human potential and accelerate progress towards achieving the Sustainable Development Goals  
94 (SDGs), it is essential to improve the health and wellbeing of adolescents (10-19 years) (1). Health is an  
95 essential component of human capital (2), yet adolescent investments have focused primarily on either  
96 health or education services with little attention to synergies between these (3). Research investments in  
97 the first 1000 days of life have dramatically outweighed investments in the subsequent 7000 days, leaving  
98 an evidence gap on how to develop and sustain human potential through adolescence and early  
99 adulthood (4).

100 Among adolescents in low- and middle-income countries (LMICs), HIV/AIDS, road injury, diarrheal  
101 diseases, self-harm, iron-deficiency anemia and skin diseases are among the top causes of morbidity and  
102 mortality (5, 6, 7). Identifying adolescents with poor health, health-compromising behaviours or  
103 undiagnosed disability is important given (a) the growing number of adolescents and their low frequency  
104 of regular contacts with health services (8) (b) the high proportion of the total global burden of disease  
105 that occurs in adolescence and (c) the fact that many key health conditions (e.g. mental health disorders)  
106 and behaviours (e.g. tobacco and alcohol use, unhealthy diet, low physical activity, risky sexual  
107 behaviours) that predispose to preventable serious conditions in later life start in adolescence (d) the  
108 negative impact of poor health on educational attainment and employability and other transitions to  
109 healthy adulthood, and (e) gender-related vulnerabilities, including violence, abuse, unintentional injury,  
110 sexual and reproductive health (SRH) and gendered mental health outcomes which may emerge or be  
111 exacerbated during this period of life, setting negative trajectories to lifetime and intergenerational health  
112 and wellbeing (4).

113 Systematic reviews have identified individual interventions that are effective at improving various aspects  
114 of adolescent health and/or wellbeing (4) However, most adolescents only come into contact with health

1  
2  
3 115 services when they are ill, and services are not always appropriate for their needs (9). This represents a  
4  
5 116 missed opportunity for early detection of health problems, for health promotion, and for the development  
6  
7 117 of health-seeking behaviours. Early and sustained engagement with health and social services could reap  
8  
9 a triple dividend for human development by improving the health and wellbeing of adolescents, their  
10 118 health and wellbeing in adulthood and the health and wellbeing of their future offspring (2, 4, 10)  
11  
12 119

13  
14  
15 120 Routine health and wellbeing check-up visits for adolescents that screen for multiple conditions and risk  
16  
17 121 behaviours could provide an entry point into services and be highly cost-effective (11, 12). Obtaining  
18  
19 122 evidence on the optimum content, delivery, effectiveness and cost of check-ups is a high priority for  
20  
21 123 adolescent health research so that governments can be informed by the evidence on how to initiate or  
22  
23 124 strengthen existing health and wellbeing check-ups during adolescence (13). Many high-income countries  
24  
25 125 have national recommendations related to adolescent health check-ups, which have been largely based  
26  
27 126 on expert opinion (14,15). In LMICs, if provided at all, preventive and promotive health services for  
28  
29 127 adolescents are largely provided in schools and are usually limited to deworming and vaccination  
30  
31 128 campaigns. They do not usually address other key conditions and risk factors such as nutrition, mental  
32  
33 129 health, SRH or disability (16, 17). If a system-wide approach to check-ups exists in adolescence, in LMICs  
34  
35 130 it is often limited to a screening activity without other components such as brief intervention or  
36  
37 131 anticipatory guidance (17).  
38  
39  
40  
41

42 132 This paper describes the protocol for the Y-Check: Evaluating the effects of adolescent health check-ups  
43  
44 133 study, a prospective hybrid implementation-effectiveness study evaluating the feasibility, acceptability,  
45  
46 134 short-term effects, costs and cost-effectiveness of the Y-Check intervention in three African cities. This  
47  
48 135 study has received approval from the World Health Organization (WHO/ERC Protocol ID Number  
49  
50 136 ERC.0003778); Ghana Health Service (Protocol ID number GHS-ERC: 027/07/22), the United Republic of  
51  
52 137 Tanzania National Institute for Medical Research (Clearance No. NIMR/HQ/R.8a/Vol.IX/4199), the  
53  
54  
55  
56  
57  
58  
59  
60

1  
2  
3 138 Medical Research Council of Zimbabwe (Approval number MRCZ/A/2766), and the London School of  
4  
5 139 Hygiene and Tropical Medicine (Approval numbers 26395 and 28312) .  
6  
7

#### 8 140 **The Y-Check intervention** 9

10  
11 141 Y-Check is a novel intervention delivering a health and wellbeing check-up and where indicated will  
12  
13 provide on-the-spot care and/or referral for common conditions on two occasions in adolescence (in  
14 142  
15 young adolescents (10-14 year-olds) – soon after the onset of puberty - and in older adolescents (15-19  
16 143  
17 year-olds) – when many adolescents become, or are soon to become, sexually active). It will also provide  
18 144  
19 health promotion information and materials to support positive behaviours and healthy lifestyles during  
20 145  
21 adolescence and beyond. The intention is that in the context of a future routinely-delivered programme,  
22 146  
23 every adolescent will have two guaranteed contacts with the health care system. Adolescents will only be  
24 147  
25 screened for conditions that have an accurate, low-cost, acceptable screening test and a locally accessible,  
26 148  
27 effective intervention. The conditions selected for screening will be chosen to reflect the local  
28 149  
29 epidemiological contexts (e.g. screening for malaria will only take place in malaria endemic areas).  
30 150  
31 Respecting specific requests from the Ministries of Education in all three cities, the study will only include  
32 151  
33 sexual and reproductive health (SRH) screening and services at the community sites (which only include  
34 152  
35 older adolescents).  
36 153  
37  
38  
39  
40  
41

42 154 Figures 1 and 2 present the Theory of Change and description of the intervention. Table 1 applies the  
43  
44 155 TIDieR checklist (18) to describe details of the intervention.  
45  
46

47 156 Locally accessible services will be identified and assessed in terms of their ability to provide the services  
48  
49 recommended by local and WHO guidelines, willingness to accept referred adolescents, and the fees  
50 157  
51 charged to the project will be negotiated by the research team for services provided to referred  
52 158  
53  
54  
55  
56  
57

1  
2  
3 159 adolescents (where adequate services are not covered by national health insurance schemes, free NGO  
4  
5 160 services or free public health care).  
6  
7

8  
9 161 **Insert Figures 1 and 2**  
10  
11  
12  
13  
14  
15  
16  
17  
18  
19  
20  
21  
22  
23  
24  
25  
26  
27  
28  
29  
30  
31  
32  
33  
34  
35  
36  
37  
38  
39  
40  
41  
42  
43  
44  
45  
46  
47  
48  
49  
50  
51  
52  
53  
54  
55  
56  
57

For peer review only



1  
2  
3 **162 Table 1: Template for Intervention Description and Replication (TIDieR) checklist describing the Y-Check**  
4 **163 intervention**

| Item                      | Item                                                                                                                                                                                                                                                                                                                                                                                                                                                                                                                                                                           |
|---------------------------|--------------------------------------------------------------------------------------------------------------------------------------------------------------------------------------------------------------------------------------------------------------------------------------------------------------------------------------------------------------------------------------------------------------------------------------------------------------------------------------------------------------------------------------------------------------------------------|
| <b>Brief name</b>         |                                                                                                                                                                                                                                                                                                                                                                                                                                                                                                                                                                                |
| 1                         | Evaluating the effectiveness of adolescent health check-ups (Y-Check)                                                                                                                                                                                                                                                                                                                                                                                                                                                                                                          |
| <b>Why?</b>               |                                                                                                                                                                                                                                                                                                                                                                                                                                                                                                                                                                                |
| 2                         | Identifying adolescents with poor health, health-compromising behaviours or undiagnosed disability is important for their health and wellbeing, and also for communities and nations<br>Most adolescents only come into contact with health services when they are ill, and services are not always appropriate for their needs<br>Routine health and wellbeing check-up visits for adolescents that screen for multiple preventable and/or treatable conditions and risk behaviours could provide an entry point into services and be highly cost-effective                   |
| <b>What?</b>              |                                                                                                                                                                                                                                                                                                                                                                                                                                                                                                                                                                                |
| 3                         | The intervention includes a comprehensive health check-up for priority conditions customized to national and local contexts.<br>Where indicated, Y-Check will provide on-the-spot care and cover all clinical costs associated with referrals to further care provided by the public health system or non-governmental organizations (NGOs).<br>During the check-up, adolescents will receive health promotion information and limited supplies of key health commodities.<br>Clinical costs of services are covered by the study if accessed within 4 months of the check-up. |
| 4                         | Adolescent-friendly services will be provided, as defined by WHO (2018). Nationally-approved protocols will be applied. Adolescent privacy and confidentiality will be protected.                                                                                                                                                                                                                                                                                                                                                                                              |
| <b>Who provided?</b>      |                                                                                                                                                                                                                                                                                                                                                                                                                                                                                                                                                                                |
| 5                         | Y-Check teams will be staffed with health professionals trained to provide quality adolescent-friendly health services in line with nationally-approved protocols. Y-Check teams will also be trained in the use of the digital application which will be used for data collection. Public and private not-for-profit care facilities providing referrals will meet national accreditation guidelines.                                                                                                                                                                         |
| <b>How?</b>               |                                                                                                                                                                                                                                                                                                                                                                                                                                                                                                                                                                                |
| 6                         | The Y-Check service will take place over a 60-90 minute period face-to-face. Any referrals will only be subsidized by the study if they take place within 4 months.                                                                                                                                                                                                                                                                                                                                                                                                            |
| <b>Where?</b>             |                                                                                                                                                                                                                                                                                                                                                                                                                                                                                                                                                                                |
| 7                         | The Y-Check service will be provided in schools and community venues, in outdoor tents where required.<br>Referrals will be to public or private not-for-profit providers as close as possible to the adolescent's home. Providers will be vetted by the study team as being able to provide the necessary referral services to national and WHO-recommended standards.                                                                                                                                                                                                        |
| <b>When and How Much?</b> |                                                                                                                                                                                                                                                                                                                                                                                                                                                                                                                                                                                |
| 8                         | Within the current phase of the study, each adolescent will receive Y-Check once. Within a routine programme the intention would be that the intervention will be delivered twice during adolescence, once when the adolescent is 10-14 years old, and a second time when they are 15-19 years old.                                                                                                                                                                                                                                                                            |
| <b>Tailoring</b>          |                                                                                                                                                                                                                                                                                                                                                                                                                                                                                                                                                                                |
| 9                         | The content of the intervention is tailored to local context. The exact set of conditions that will be assessed as part of Y-Check will be adapted based on burden of disease, and availability of local tests and referral services.                                                                                                                                                                                                                                                                                                                                          |
| <b>Modifications</b>      |                                                                                                                                                                                                                                                                                                                                                                                                                                                                                                                                                                                |

| Item             | Item                                                                                                                                                   |
|------------------|--------------------------------------------------------------------------------------------------------------------------------------------------------|
| 10               | Any modifications will be reported in the article reporting the results of the study.                                                                  |
| <b>How well?</b> |                                                                                                                                                        |
| 11               | Intervention fidelity (adherence, integrity, quality) will be evaluated through a process evaluation including youth-friendly health services quality. |
| 12               | Intervention fidelity will be reported in the article reporting the results of the study.                                                              |

164

## 165 **Methods/Design**

### 166 **Aims**

167 The aim of the study is to develop and implement in three African cities a potentially sustainable  
 168 adolescent health check-up programme, and evaluate the acceptability, feasibility, short-term effects,  
 169 and cost-effectiveness of the programme to improve health and wellbeing. The study was launched in  
 170 September 2021 and will run until June 2025.

### 171 **Objectives**

172 (1) To develop and pilot test a check-up programme for adolescents that screens for important  
 173 preventable and treatable health conditions using accurate and acceptable screening tests and  
 174 provides locally accessible effective interventions.

175 (2) Through a prospective intervention study in selected schools and communities to:

- 176 • Estimate short-term impacts on adolescent health and wellbeing outcomes: clinical  
 177 outcomes, health-related knowledge and behaviours, intentions, agency, and perceived social  
 178 support for behaviour change; engagement with health services.
- 179 • Understand, through process evaluation, the feasibility and fidelity of implementation, the  
 180 acceptability and uptake, and the influence of context.

- 1  
2  
3 181           • Estimate the cost-effectiveness of the programme in reducing overall disease burden and  
4  
5 182           improving adolescent wellbeing  
6  
7 183       (3) Obtain information on key parameters needed for the planning of an evaluation study: prevalence  
8  
9           of health conditions and behaviours, acceptability of referral, feasibility of following-up  
10 184  
11           programme participants and delivering quality follow-up care, initial estimates of the impact of  
12 185  
13           the programme on longer-term health, educational and wellbeing outcomes based on the short-  
14 186  
15           term implementation and effectiveness outcomes observed in this phase of the research  
16 187  
17           programme, and factors related to the optimal implementation of the Y-Check intervention.  
18 188  
19       (4) To refine the programme and its theory of change, and finalise optimal methods for the  
20 189  
21           measurement of the impact of the programme in future studies.  
22 190  
23  
24  
25  
26

### 191       **Patient and public involvement**

27  
28  
29  
30 192       The intervention was designed following formative research conducted in three African countries  
31  
32 193       between 2019 and 2020 (19, 20, 21). This formative research revealed that the proposed adolescent  
33  
34 194       health and wellbeing check-ups are likely to be feasible to implement and acceptable to stakeholders in  
35  
36 195       Ghana, Tanzania and Zimbabwe, and are likely to meet the perceived needs of key stakeholders including  
37  
38 196       adolescents, their parents, and key policy makers in the health and education sectors (22). Further, we  
39  
40 197       showed that the programme is likely to produce a substantial yield of important, previously untreated,  
41  
42 198       treatable conditions. Human-centered design techniques were used alongside desk review to define  
43  
44 199       elements of objective and subjective importance to the health and wellbeing of adolescents, identify  
45  
46 200       facilitators and barriers to adolescent health seeking, preferences for delivery of routine health check-  
47  
48 201       ups, and potential effects of interventions to select the content and method of delivery of the Y-Check  
49  
50 202       intervention. Interviews and participatory workshops with adolescents, parents of adolescents and key  
51  
52 203       stakeholders from the ministries of health and education, non-governmental organizations, healthcare  
53  
54  
55  
56  
57  
58  
59  
60

1  
2  
3 204 workers and teachers found that there was overall support for the introduction of routine health check-  
4  
5 205 ups (19, 20, 21). To navigate potential barriers, stakeholders suggested clear messaging, awareness  
6  
7 206 building, and sensitization campaigns to overcome disinterest in preventative healthcare and, in some  
8  
9 207 contexts, mitigate cultural or religious messaging against healthcare engagement (19).  
10  
11  
12

### 13 208 **Theory of Change**

14  
15 209 We hypothesise that a routine health and wellbeing check-up visit for adolescents that screens for  
16  
17 210 multiple conditions and risk behaviours will have an immediate and long-term positive impact on health  
18  
19 211 and wellbeing outcomes (Figure 1).  
20  
21

22 212 Health seeking and promotion behaviours among adolescents operate in complex environments and  
23  
24 213 across ecological levels (10), with determinants at individual, interpersonal institutional/organizational,  
25  
26 214 community and public policy levels. Drawing from the health promotion literature (23, 24), the Theory of  
27  
28 215 Change for Y-Check (Figure 1) draws on thinking that recognizes pre-disposing, enabling and reinforcing  
29  
30 216 factors as capacities to be strengthened in order to achieve adolescent wellbeing at the individual level;  
31  
32 217 that responsive parenting can support adolescents to meet their own health and wellbeing goals; that  
33  
34 218 systems-based approaches (including stronger linkages between health and education systems) can  
35  
36 219 improve outcomes for adolescents, especially reaching the most vulnerable and those in need; and that  
37  
38 220 an enabling environment (especially in schools and communities) can support adolescents to take action  
39  
40 221 towards improving their health.  
41  
42  
43  
44

### 45 222 **Study setting**

46  
47  
48 223 Our study will be undertaken in three African cities: Cape Coast in Ghana, Mwanza in Tanzania and  
49  
50 224 Chitungwiza in Zimbabwe. These cities are described in Table 2.  
51  
52

53 225  
54 226  
55 227  
56

228 **Table 2: The study cities, schools and communities**

| <b>Cape Coast, Ghana</b>                                                                                                                                                                                                                                                                                                                                                                                                                                                                                                                                                                                                                                                                                                                                                                                                                                                                                                                                                                        | <b>Mwanza, Tanzania</b>                                                                                                                                                                                                                                                                                                                                                                                                                                                                                                                                                                                                                                                                                                                                                                                                                                                                                                                                                                                                    | <b>Chitungwiza, Zimbabwe</b>                                                                                                                                                                                                                                                                                                                                                                                                                                                                                                                                                                                                                                                                                                                                                                                                                                                                                                                                                                                                                                                                                                                                 |
|-------------------------------------------------------------------------------------------------------------------------------------------------------------------------------------------------------------------------------------------------------------------------------------------------------------------------------------------------------------------------------------------------------------------------------------------------------------------------------------------------------------------------------------------------------------------------------------------------------------------------------------------------------------------------------------------------------------------------------------------------------------------------------------------------------------------------------------------------------------------------------------------------------------------------------------------------------------------------------------------------|----------------------------------------------------------------------------------------------------------------------------------------------------------------------------------------------------------------------------------------------------------------------------------------------------------------------------------------------------------------------------------------------------------------------------------------------------------------------------------------------------------------------------------------------------------------------------------------------------------------------------------------------------------------------------------------------------------------------------------------------------------------------------------------------------------------------------------------------------------------------------------------------------------------------------------------------------------------------------------------------------------------------------|--------------------------------------------------------------------------------------------------------------------------------------------------------------------------------------------------------------------------------------------------------------------------------------------------------------------------------------------------------------------------------------------------------------------------------------------------------------------------------------------------------------------------------------------------------------------------------------------------------------------------------------------------------------------------------------------------------------------------------------------------------------------------------------------------------------------------------------------------------------------------------------------------------------------------------------------------------------------------------------------------------------------------------------------------------------------------------------------------------------------------------------------------------------|
| <p>Cape Coast Metropolis is located on the coast of Ghana, 150kms west of the capital city, Accra. It has a population of 169,894 with three-quarters of the households residing in urban areas.</p> <p>Literacy in 11-24 year-olds is about 97%. In 2016, 11,233 (68.8%) of 12-14 year-olds were enrolled in junior high schools while 8,407 (91.6%) of 15-17 year-olds were enrolled in senior high schools. For Ghana as a whole, primary and secondary net enrollment rates in 2019 were 86% and 57%, respectively (25)</p> <p>There are 36 health facilities (26 public and 10 private) in the metropolitan area, including a regional hospital that serves as a secondary referral facility.</p> <p>The study will be conducted in 8 schools and local community venues in four communities that include two relatively affluent communities with trading being the main source of livelihood and two relatively poorer communities where fishing and farming dominate, respectively.</p> | <p>Mwanza is located on the southern shores of Lake Victoria in North-Western Tanzania and is the second largest city in Tanzania with a population of over 900,000 and an annual growth rate of 3% (26). Economic activities in Mwanza include fishing and fish processing, subsistence agriculture and support services to nearby gold and diamond mines.</p> <p>Adolescents make up 24.2% of the population of the city (Tanzania National Bureau of Statistics, 2016). As of 2020/21, the primary and secondary school net enrollment rates were 82% and 39%, respectively (26)</p> <p>Available public health services include 26 dispensaries, 5 health centres, 2 district hospitals, 1 regional hospital and 1 tertiary/teaching hospital (26, 27).</p> <p>The study will be conducted in 4–6 purposively-selected communities and in up to 8 primary schools and 8 secondary schools within the catchment area of health facilities serving the selected communities in the two districts within Mwanza city.</p> | <p>Chitungwiza is the third largest city in Zimbabwe, located approximately 25km south of the capital city, Harare. It has a population of about 456,000 (28). The houses are mostly high-density, single-story, detached units with small yards that are generally used for growing vegetables. Most of the people work in Harare, as there is little industry in Chitungwiza itself.</p> <p>Zimbabwe has a school-going population (8-18 years) of approximately 4.3 million (29). Net primary enrollment rate across Zimbabwe is 94%; net secondary enrollment rate is 54% (28)</p> <p>In Chitungwiza, there is one tertiary hospital, 4 public primary healthcare facilities, 20 private medical facilities, 30 government primary schools, and 13 government secondary schools (all mixed sex).</p> <p>The study will be conducted in four distinct communities which are representative of the urban, peri-urban and rural populations of Chitungwiza. Eligible schools must have a student population of at least 200 learners in Grade 6 or at least 75 learners in Form 5; and be located in or close to one of the selected study communities.</p> |

229

230 **Study design**

231 In this prospective hybrid implementation-effectiveness study, 2000 adolescents per city who receive the

232 Y-Check intervention will be followed up at 4-months, and at 12-months (Zimbabwe only).

233 **Stakeholder engagement**

234 In each city, the research study is undertaken in partnership with both the national and municipal

235 Ministries of Health and Education. Each country has a policy framework that provides encouragement

236 for the introduction of health and nutrition education and promotion among adolescents, including

237 screening for communicable and non-communicable diseases, immunization, growth monitoring and

238 assessments and nutritional services (30-32).

1  
2  
3 239 This study will build on stakeholder engagement, the process for which was established in each research  
4  
5 240 setting during the formative phase. In each city, a Community Advisory Committee (CAC) comprising key  
6  
7 241 community leaders and stakeholders will be reinforced or set up to facilitate input from, and feedback to,  
8  
9 242 participating communities and a Youth Advisory Group (YAG) will provide a forum for adolescents to input  
10  
11 243 into the programme. The YAG will meet with research staff at least 4 times per year, be active participants  
12  
13 244 in programme design and dissemination workshops, and help to ensure that the programme meets the  
14  
15 245 needs of adolescents. Community engagement will be an ongoing process through regular contacts with  
16  
17 246 the CAC, the YAG and other stakeholders, such as teachers, health workers, Community Based  
18  
19 247 Organizations (CBOs), Non-Governmental Organizations (NGOs), and religious leaders. In addition, a key  
20  
21 248 aspect for building confidence within communities is the knowledge that the study has the support of the  
22  
23 249 government.  
24  
25  
26  
27  
28

### 29 **Intervention development and pilot testing**

30  
31  
32 251 Prior to implementation, preparatory activities will include community engagement, participatory co-  
33  
34 252 design, negotiating referral arrangements and pre-testing of screening tools, procedures and referral  
35  
36 253 protocols. Pilot studies in each setting will provide initial estimates of the frequency of health and  
37  
38 254 behavioural outcomes, and help to refine the intervention model.  
39  
40  
41

42 255 Pilot testing will involve the implementation of the screening tools and procedures with approximately  
43  
44 256 200 adolescents in each of the three cities with revisions and repeat pilot testing where required.  
45  
46 257 Adolescents who participate in the pilot study will be excluded from the main study if the procedures  
47  
48 258 change following the pilot. There will be an opportunity for young people and stakeholders to suggest  
49  
50 259 additional client-centered outcomes that may reflect some of their priority concerns or intentions that  
51  
52 260 should be captured.  
53  
54  
55  
56  
57  
58  
59  
60

1  
2  
3 **261 Intervention implementation**  
4  
5

6 262 The intervention will be delivered over a period of 2-6 months in each of the settings. The follow-up visits  
7  
8 263 will take place at the same school or community setting as the initial check-up. In addition to covering all  
9  
10 264 clinical costs, the equivalent of USD 5 will be given to each participant who attends the follow-up to cover  
11  
12 265 any transport costs that they might have incurred. Additionally, health and hygiene related items will also  
13  
14  
15 266 be provided for adolescents to take home, including tooth cleaning kit (toothbrush and toothpaste), fruit,  
16  
17 267 bottle of water, two pairs of underpants, pack of reusable sanitary pads (girls only)  
18  
19

20  
21 **268 Composition and training of Y-Check team**  
22  
23

24 269 The Y-Check team will be trained to deliver adolescent-responsive and age-appropriate services according  
25  
26 270 to national and WHO guidelines, recognizing also the needs for privacy and confidentiality (33). This  
27  
28 271 includes providing services that are attractive to adolescents, meet their needs comfortably and  
29  
30 272 responsively, and that are attentive to their privacy. These principles and approaches will be embedded  
31  
32 273 into each part of the Y-Check intervention. Visual and auditory privacy will be prioritized, through the use  
33  
34  
35 274 of separate tents, rooms or screens. Health workers will employ standard gowning and draping for clinical  
36  
37 275 procedures.  
38  
39

40  
41 276 For infection prevention and control (IPC), all study procedures including interviews, physical  
42  
43 277 examinations and blood tests will take place in well-aerated tents or outdoors, and will follow relevant  
44  
45 278 nationally-approved protocols for all staff and participants.  
46  
47

48  
49 279 The Y-Check team will be trained in good clinical practice, data protection and confidentiality, and clinical  
50  
51 280 staff will be trained in counselling for participants testing positive for any of the conditions being screened  
52  
53 281 for within Y-Check as well as in general counselling skills.  
54  
55  
56  
57

1  
2  
3 **282 Inclusion and exclusion criteria**  
4  
5

6 **283** To be included in the study, adolescents aged 10-19 years must fall into one of the first three categories  
7  
8  
9 **284** below and fulfil category 4.

10  
11  
12 **285** 1) Be attending selected classes of Year 5 of primary school in Mwanza (median age 11 years); Grade 5/6  
13  
14 **286** of primary school in Chitungwiza (median age 11 years); or Year 1 of Junior Secondary School in Cape  
15  
16 **287** Coast (median age 12 years) OR

17  
18  
19  
20 **288** 2) Be attending selected classes in Year 3 of Secondary School in Mwanza (median age 17 years), Form  
21  
22 **289** 3/4 in Chitungwiza (median age 17 years), or Year 2 of Senior Secondary School in Cape Coast (median  
23  
24 **290** age 16 years) OR

25  
26  
27  
28 **291** 3) Be resident in a selected community during the time of the Y-Check intervention, and be aged 16-19  
29  
30 **292** years

31  
32  
33 **293** AND

34  
35  
36  
37 **294** 4) Have a completed and signed Informed Consent form, or a signed Informed Assent Form and signed  
38  
39 **295** Parental/Guardian Informed Consent Form if the adolescent is seen in the community and is below the  
40  
41 **296** national age of consent or is seen in a school, irrespective of their age.

42  
43  
44  
45 **297 Consent and Assent procedures**  
46

47  
48 **298** Before the visit of the implementation team, information on the Y-Check programme will be distributed  
49  
50 **299** to parents/guardians through the schools and to community members through an active communication  
51  
52  
53 **300** campaign in collaboration with the CAC and the YAG. School and community meetings will allow parents  
54  
55 **301** and community members to ask questions about the programme and give their feedback.  
56  
57



1  
2  
3 302 In schools, adolescents will have a short introductory meeting with a member of the Y-Check team  
4  
5 303 typically in a class or group setting. Parents meetings will then be held in each of the schools, to which all  
6  
7 304 the parents and guardians of eligible learners will be invited. During these sessions, information will be  
8  
9 305 provided about the study, its objectives and procedures, possible risks and procedures that will be used  
10  
11 306 to maintain confidentiality. These meetings will provide an opportunity for the adolescents, parents and  
12  
13 307 guardians of eligible adolescents to learn more about the Y-Check intervention and the research linked to  
14  
15 308 it and to have their questions answered.  
16  
17  
18  
19

20 309 No participants will be screened, receive care or be counselled or interviewed without their informed  
21  
22 310 consent (community participants who are above the national age of consent), or, for minors, their assent  
23  
24 311 and parental consent, unless they are determined to be emancipated minors (34). Following advice from  
25  
26 312 Ministries of Education in all three countries, all adolescents seen in schools will be considered to be  
27  
28 313 minors and require parental consent, irrespective of their age.  
29  
30  
31

32 314 Minor adolescents' assent will be ascertained and documented in an assent form. Parents or guardians  
33  
34 315 who would like their adolescent to receive the check-up will be asked to provide their written consent.  
35  
36 316 On the day of the check-up visit, a verbal confirmation of their previous written assent will be requested  
37  
38 317 from the adolescent. In Ghana and Tanzania, where the minimum age for providing consent to medical  
39  
40 318 and health-related research is 18 years, clients of all ages under 18 will provide completed parental  
41  
42 319 consent forms and provide written assent before proceeding through the check-up visit regardless of  
43  
44 320 whether the check-up is in schools or communities. In Zimbabwe, a waiver of parental consent has been  
45  
46 321 given by the Medical Research Council of Zimbabwe (MRC-Zimbabwe) so that participants aged 16 and 17  
47  
48 322 years who attend the check-ups in the community venues will be allowed to provide written consent for  
49  
50 323 themselves.  
51  
52  
53  
54  
55  
56  
57  
58  
59  
60

1  
2  
3 324 The intervention will be conducted in private and not in the presence of the parent or guardian. Contact  
4  
5 325 details of the study team will be shared with participants in case they have questions at a later stage. All  
6  
7 326 participants will be reminded that participation is entirely voluntary and will be told that they can opt out  
8  
9  
10 327 of the research or services at any time.  
11  
12

### 13 328 **Data collection**

#### 16 329 *During the Y-Check intervention and follow up*

19 330 Data collection during baseline and follow-up visits will include self-completed evaluation questionnaires,  
20  
21 331 self-reported screening tool responses and screening visit consultations, measurements and specimen  
22  
23 332 collection and an exit interview. Data on the implementation process and on adolescent outcomes will be  
24  
25 333 collected in digital and paper-based formats. A user-friendly digital data collection app for the check-ups  
26  
27 334 will be developed and housed on a tablet computer for direct use by the adolescent. Initial sections will  
28  
29 335 include audio-assisted, user-friendly self-completion questions for adolescents to fill out. This will utilize  
30  
31 336 engaging content and processes, tailored to adolescents' interests. The option of a face-to-face interview  
32  
33  
34 337 will also be available if the adolescent is unable to use the tablet or has low literacy level. Health services  
35  
36 338 registers and school registers will also be reviewed to determine the number of adolescents of the  
37  
38 339 relevant age ranges, and school attendance by the classes involved in Y-Check. To help build the referral  
39  
40 340 process, existing adolescent services will be mapped in the study communities.  
41  
42  
43

44 341

#### 46 342 *Process evaluation*

48 343 The process evaluation is guided by the UK MRC's Process Evaluation framework to understand  
49  
50 344 intervention implementation (including feasibility and fidelity), mechanisms of impact (including  
51  
52 345 acceptability and uptake), and the influence of context (35). Key implementation outcomes of interest are  
53  
54 346 acceptability, adoption, appropriateness, feasibility, and fidelity. Data on contextual factors and barriers  
55  
56  
57  
58  
59  
60

1  
2  
3 347 and facilitators to programme implementation will be gathered using routinely-collected programme  
4  
5 348 monitoring data. Qualitative data will be collected through 1) observations of the Y-Check intervention  
6  
7 349 and referrals, as well as team meetings; 2) in-depth interviews with eligible adolescents who received,  
8  
9  
10 350 adolescents who were referred, and adolescents who did not receive Y-Check, as well as with school  
11  
12 351 authorities and the Y-Check service providers; and 3) participatory workshops with teachers, adolescents,  
13  
14 352 and parents. Quantitative programme monitoring data will be collected routinely within the Y-Check visit,  
15  
16 353 including through a participant exit interview. Process evaluation data will be analysed iteratively and  
17  
18 354 thematically, through regular analytical discussions and analytical memos to draw out the main themes  
19  
20 355 emerging from the data. Across the pilot and intervention studies, data collection for the process  
21  
22 356 evaluation will include real-time feedback to the implementation team.

### 23 357 *Economic evaluation*

24  
25  
26  
27 358 A costing study will be conducted to estimate the total costs of developing, setting up, and running the Y-  
28  
29 359 Check package, in school and community settings. A combination of top-down and ingredients-based  
30  
31 360 costing approaches will be used to generate cost estimates for the whole package, and for each  
32  
33 361 component/activity. All costs will be estimated from the perspectives of the adolescents, the  
34  
35 362 schools/community and implementing partners/service providers. Financial and economic costs will be  
36  
37 363 calculated for all inputs. These inputs will be identified and measured using process data, staff interviews  
38  
39 364 and observations, document review, and accounting records.

40  
41  
42  
43  
44 365 Costs will be inputted and analysed in an Excel-based costing tool. The cost analysis will describe the  
45  
46 366 distribution of costs across different forms of inputs, and will estimate the unit cost per adolescent  
47  
48 367 reached, screened, and treated on the spot or referred; cost per unit of measure for selected process and  
49  
50 368 effect outcomes such as cost per condition detected, cost per condition appropriately treated on-the-spot  
51  
52 369 or with a completed referral within 4 months, cost for a unit improvement in reported quality of life and  
53  
54 370 Disability Adjusted Life Years (DALYs) averted.

1  
2  
3 371 The cost and cost-effectiveness estimates will be compared to other programmes in the region (eg. human  
4  
5 372 papillomavirus vaccination, deworming) and will inform programme replication, scalability, and financial  
6  
7 373 sustainability.

8  
9  
10  
11 374 *Data protections*

12  
13 375 Data protection will be strictly observed. After study completion, data will be stored in the LSHTM-curated  
14  
15 376 digital repository 'Data Compass' following General Data Protection Regulation (GDPR) guidelines. Data  
16  
17 377 and code registered in LSHTM Data Compass will be made open access following deposit. A Data Safety  
18  
19 378 and Monitoring Board (DSMB) has been constituted to assist in managing adverse events, though we  
20  
21 379 expect these to be very rare since all treatment and care are standard with no novel treatments.

22  
23  
24  
25 380 **Study outcomes**

26  
27  
28  
29 381 Outcomes will be ascertained during the check-up screening visit and through collection of referral  
30  
31 382 vouchers from the referral health facilities, and, for outcomes related to health and wellbeing impacts,  
32  
33 383 through data from the 4-month and, in Zimbabwe only, 12-month follow-up visits. Outcomes related to  
34  
35 384 completed referrals will be triangulated against participants' self-reports at the 4-month and. In  
36  
37 385 Zimbabwe only, 12-month follow-up visits. Review of school and health service registers will be used to  
38  
39 386 see whether attendance has increased during the period when Y-Check is being implemented.

40  
41  
42  
43 387 The primary outcome will be the proportion of those screening positive for at least one condition who  
44  
45 388 receive appropriate on-the-spot care or complete appropriate referral for all identified conditions within  
46  
47 389 4 months. This will be measured using data collected at the initial check-up visit and through recovery of  
48  
49 390 referral vouchers given to participants to allow them to access referral services for free during the 4-  
50  
51 391 months after the Y-Check screening. Completed referral is defined as attending at least the first referral  
52  
53 392 appointment.

1  
2  
3 393 Secondary implementation outcomes will include the proportion of those screening positive for each  
4  
5 394 condition who receive appropriate on-the-spot care or complete appropriate referral for that condition  
6  
7 395 within 4 months, the yield of previously untreated conditions, clinical outcomes at 4 months among those  
8  
9 396 who had originally screened positive for each condition, and intervention acceptability, adoption,  
10  
11 397 appropriateness, feasibility, fidelity and cost. Secondary effectiveness outcomes will include knowledge  
12  
13 398 about health services and health behaviours, self-reported agency and self-efficacy to make decisions  
14  
15 399 about their health, self-reported health-related risk and protective behaviours, reported engagement  
16  
17 400 with health services, wellbeing, self-esteem and quality of life, clinical outcomes, and educational  
18  
19 401 outcomes, which will be collected within the Y-Check and follow-up visits. The short-term cost-  
20  
21 402 effectiveness of the intervention will be estimated (calculated by a comparison of the costs of the  
22  
23 403 intervention against the primary and secondary outcomes and including short-term changes in self-  
24  
25 404 reported quality of life). All outcomes for the study are described in Table 3.  
26  
27  
28  
29  
30

### 31 405 **Sample size**

32  
33 406 In each city, the intervention will be implemented for 10-14 year-olds in up to 6 government primary  
34  
35 407 schools (N=500 for young adolescent girls, and N=500 for young adolescent boys), and for 15-19 year-olds  
36  
37 408 in up to 8 secondary schools and up to 3 community venues (N=500 for older adolescent girls, and N=500  
38  
39 409 for older adolescent boys), giving a total sample size of 2,000 adolescents (10-19y).  
40  
41  
42  
43  
44

45 411 The sample size provides specified precision around the primary outcome. For example, for the primary  
46  
47 412 outcome, within each age group and gender, if 150 (30%) of 500 participants screen positive for at least  
48  
49 413 one condition, and 75% of those who screen positive are correctly managed (n=112), the 95% CI for  
50  
51 414 correct management will be +/- 7%. The primary outcome used data from the initial check-up visit and  
52  
53 415 referrals and did not require the 4-month follow-up data.  
54  
55  
56  
57  
58  
59  
60

416 **Table 3: Study outcomes and means of verification**

| Outcome                                                                                                                                                                                                                                                                                                                                                      | Sources of data                                                                                                                                                                                                                                                                                                                   |
|--------------------------------------------------------------------------------------------------------------------------------------------------------------------------------------------------------------------------------------------------------------------------------------------------------------------------------------------------------------|-----------------------------------------------------------------------------------------------------------------------------------------------------------------------------------------------------------------------------------------------------------------------------------------------------------------------------------|
| <b>Primary outcome</b>                                                                                                                                                                                                                                                                                                                                       |                                                                                                                                                                                                                                                                                                                                   |
| Proportion of those screening positive for at least one condition who receive appropriate on-the-spot care or complete appropriate referral for all identified conditions within 4 months (i.e. they attend a provider for referral care who has been accredited by the study team and has been shown to be capable of providing appropriate referral care). | <ul style="list-style-type: none"> <li>• Programme monitoring data including records of attendance for referrals</li> <li>• Screening tool (self-reported symptoms or conditions, measurements and clinical actions)</li> </ul>                                                                                                   |
| <b>Secondary outcomes</b>                                                                                                                                                                                                                                                                                                                                    |                                                                                                                                                                                                                                                                                                                                   |
| <b>Implementation outcomes</b>                                                                                                                                                                                                                                                                                                                               |                                                                                                                                                                                                                                                                                                                                   |
| Proportion of those screening positive for each condition who receive appropriate on-the-spot care or complete appropriate referral for that condition within 4 months.                                                                                                                                                                                      | <ul style="list-style-type: none"> <li>• Programme monitoring data including records of attendance for referrals</li> <li>• Screening tool (self-reported symptoms or conditions, measurements, and clinical actions)</li> </ul>                                                                                                  |
| The yield of previously untreated conditions.                                                                                                                                                                                                                                                                                                                | <ul style="list-style-type: none"> <li>• Programme monitoring data including records of attendance for referrals</li> <li>• Screening tool (self-reported symptoms or conditions, measurements, and clinical actions)</li> </ul>                                                                                                  |
| Intervention acceptability (satisfaction): acceptability to adolescents and to other stakeholders (eg. schools, parents, health workers).                                                                                                                                                                                                                    | <ul style="list-style-type: none"> <li>• Programme monitoring data including records of attendance for referrals</li> <li>• Screening tool (self-reported symptoms or conditions, measurements, and clinical actions)</li> </ul>                                                                                                  |
| Intervention adoption (uptake, utilization): Y-Check uptake, referrals completed.                                                                                                                                                                                                                                                                            | <ul style="list-style-type: none"> <li>• Self-completed evaluation questionnaire</li> <li>• Exit interviews</li> </ul>                                                                                                                                                                                                            |
| Intervention appropriateness (perceived fit, perceived relevance, perceived usefulness): perceived value of the intervention to adolescents and to other stakeholders.                                                                                                                                                                                       | <ul style="list-style-type: none"> <li>• Observations of the Y-Check visits and of selected referrals</li> <li>• Interviews and workshops with adolescents, healthcare providers, community members, teachers, parents and key stakeholders</li> </ul>                                                                            |
| Intervention feasibility (actual fit, practicability): Y-Check visits completed, referrals completed, stakeholder support (including community).                                                                                                                                                                                                             | <ul style="list-style-type: none"> <li>• Interviews and workshops with adolescents, healthcare providers, community members, teachers, parents and key stakeholders</li> <li>• Observations of the Y-Check visits and of selected referrals, including youth friendly services</li> <li>• Self-reported screening tool</li> </ul> |
| Intervention fidelity (adherence, integrity, quality): completeness of training for and delivery of intervention components; diagnostic accuracy; youth-friendly health services quality assessment.                                                                                                                                                         | <ul style="list-style-type: none"> <li>• Y-Check documentation and financial records</li> <li>• Interviews with Y-Check staff and staff of the referral facilities.</li> </ul>                                                                                                                                                    |
| <b>Economic outcomes</b>                                                                                                                                                                                                                                                                                                                                     |                                                                                                                                                                                                                                                                                                                                   |
| Cost of setting up and running the intervention.                                                                                                                                                                                                                                                                                                             | <ul style="list-style-type: none"> <li>• Programme monitoring data including records of attendance for referrals</li> </ul>                                                                                                                                                                                                       |
| Cost per adolescent with a newly diagnosed condition (overall and by condition).                                                                                                                                                                                                                                                                             | <ul style="list-style-type: none"> <li>• Y-Check documentation and financial records</li> <li>• Interviews with Y-Check staff and staff of the referral facilities.</li> </ul>                                                                                                                                                    |
| Cost per adolescent with a newly diagnosed condition who received appropriate on-the-spot care or who completed an appropriate referral within 4 months (overall and by condition).                                                                                                                                                                          | <ul style="list-style-type: none"> <li>• Programme monitoring data including records of attendance for referrals</li> </ul>                                                                                                                                                                                                       |

|                                                                                                                                                                                         |                                                                                                                                                                                                                                                                              |
|-----------------------------------------------------------------------------------------------------------------------------------------------------------------------------------------|------------------------------------------------------------------------------------------------------------------------------------------------------------------------------------------------------------------------------------------------------------------------------|
| Short-term (4 months) cost-effectiveness: cost per improvement in health or wellbeing (e.g. cost per case addressed or cured), cost per unit improvement in QALYs and per DALY averted. | <ul style="list-style-type: none"> <li>Screening tool (self-reported symptoms or conditions, measurements and clinical actions)</li> </ul>                                                                                                                                   |
| <b>Client outcomes</b>                                                                                                                                                                  |                                                                                                                                                                                                                                                                              |
| Knowledge about health services and health behaviours.                                                                                                                                  | <ul style="list-style-type: none"> <li>Programme monitoring data including records of attendance for referrals</li> <li>Screening tool (self-reported symptoms or conditions, measurements and clinical actions)</li> <li>Self-completed evaluation questionnaire</li> </ul> |
| Intentions to adopt healthy behaviours.                                                                                                                                                 |                                                                                                                                                                                                                                                                              |
| Agency to make decisions about health and wellbeing.                                                                                                                                    |                                                                                                                                                                                                                                                                              |
| Perceived social support for behaviour change.                                                                                                                                          |                                                                                                                                                                                                                                                                              |
| Health-related risk and protective behaviours.                                                                                                                                          |                                                                                                                                                                                                                                                                              |
| Improvement in previously diagnosed health and wellbeing conditions.                                                                                                                    |                                                                                                                                                                                                                                                                              |
| Engagement with health and other services within the past 4 months.                                                                                                                     |                                                                                                                                                                                                                                                                              |
| Self-esteem.                                                                                                                                                                            |                                                                                                                                                                                                                                                                              |
| Self-perceived wellbeing.                                                                                                                                                               |                                                                                                                                                                                                                                                                              |
| Quality of life.                                                                                                                                                                        |                                                                                                                                                                                                                                                                              |
| Clinical outcomes.                                                                                                                                                                      |                                                                                                                                                                                                                                                                              |
| Educational outcomes (e.g. school attendance).                                                                                                                                          | <ul style="list-style-type: none"> <li>Self-completed evaluation questionnaire</li> <li>School register review</li> </ul>                                                                                                                                                    |
| Client-defined outcomes (to be determined).                                                                                                                                             | <ul style="list-style-type: none"> <li>Self-completed evaluation questionnaire</li> <li>Exit interviews</li> </ul>                                                                                                                                                           |

417

#### 418 **Statistical analysis**

419 All primary analyses will be conducted separately by study city; Cape Coast, Chitungwiza and Mwanza.

420 Where comparable, secondary analyses will be conducted with the data from all three cities combined.

421 In our study sites, a contemporaneous comparison group is not required since no routine screening is  
 422 currently taking place, and as a result, assessments at baseline will serve as the counterfactual for internal  
 423 comparisons. Similarly, since there is no routine screening and treatment provided to adolescents of the  
 424 target ages in the study population, a before-after comparison is appropriate since it is plausible to assume  
 425 that reductions in the prevalence of the chronic conditions between the original Y-Check visit and the  
 426 follow-up at four months will be due to the interventions provided through Y-Check.

427 We will follow STROBE guidelines for the reporting of cohort studies. Descriptive analyses will be used to  
 428 compare the community-level and school-level characteristics of the study communities and schools.

1  
2  
3 429 Quantitative programmatic data, including screening test results, services delivered, and referrals made  
4  
5 430 and completed, will be reported by age, sex, and city. The primary outcome is a single proportion which  
6  
7 431 will be presented with a 95% confidence interval for each of the 4 target groups: 10–14-year-old males,  
8  
9 432 10-14 year-old females, 15-19 year-old males, 15-19 year-old females.

10  
11  
12  
13 433 Secondary outcomes which are measured at a single time point will be presented in a similar way to the  
14  
15 434 primary outcome. For outcomes which are measured at two or more time points, a before-after analysis  
16  
17 435 will be conducted comparing differences in measures between the time points. The unit of analysis will  
18  
19 436 be the individual. For clinical outcomes which are measured at two or more time-points, the initial check-  
20  
21 437 up visit (baseline) will give the prevalence of untreated conditions which will represent the counterfactual.  
22  
23 438 The prevalence of conditions at the 4-month follow-up visit will be formally compared to this  
24  
25 439 counterfactual to estimate the short-term effects of the intervention in improving these clinical outcomes.  
26  
27 440 For analysis of outcomes measured at two timepoints we will use mixed effects logistic regression (binary  
28  
29 441 outcomes) or linear regression (continuous outcomes) adjusting for individual-level clustering as a random  
30  
31 442 effect and school/community as a fixed effect. Health service and client determinants of correct  
32  
33 443 management of conditions at 4 months will be analyzed using multivariable regression.  
34  
35  
36  
37  
38

#### 39 444 Ethics and Dissemination

40  
41  
42 445 Ethics clearance has been received from WHO (WHO/ERC.0003778) and from all country national ethics  
43  
44 446 bodies. Protocol modifications will be shared with the WHO Ethics Review Committee and relevant  
45  
46 447 national ethics boards. Results will be published in at least 3 country-specific peer reviewed journal  
47  
48 448 publications and one multi-country publication. There will also be videos, briefs, webinars and meetings  
49  
50 449 to disseminate results. All data will be placed into an open access repository after deidentification and  
51  
52 450 anonymisation to ensure confidentiality and participant privacy.  
53  
54  
55  
56  
57



451

452 **Discussion**

453 Over the last decade, adolescent wellbeing has become a global priority (5). School health is also a growing  
454 area of policy interest (36). WHO guidelines on school health services note that along with health  
455 promotion, health education, preventive interventions (such as immunizations and mass drug  
456 administration), clinical assessment and health services management, health screenings within school  
457 learners are one of the key pillars in the delivery of comprehensive school health services (16). Screening  
458 programs such as Y-Check provide a unique opportunity to detect easily treatable, high-burden health  
459 conditions, refer those requiring medical attention, treatment and care, as well as to advise and  
460 encourage adolescents to engage in healthy behaviours.

461 In a 2015 review, school health services were found to exist in at least 102 countries though their content  
462 varied considerably across 16 areas including vaccinations, sexual and reproductive health education,  
463 vision screening, nutrition screening, and nutrition health education (37). If all types of screening were  
464 combined, they were the second most commonly reported intervention in school health services, second  
465 only to immunization. A later systematic review found evidence of routine health check-ups of school age  
466 children having been reported in 86 countries worldwide (17). Despite their widespread existence, little  
467 quality evidence exists on how to promote good health for adolescents in educational settings (37), and  
468 even less for multi-component school health services (38) especially in low- and middle-income countries  
469 (39).

470 Good practices in conducting adolescent health or wellbeing screenings are rarely reported. In 2023, WHO  
471 will release new guidance on well-child and well-adolescent visits, which will recommend expanding  
472 routine screening tests to also integrate other wellbeing dimensions through a broader evaluation of  
473 social risks, emotional state, and individual and family resources delivered with context-specific

1  
2  
3 474 recommendations at key moments during the first two decades of life. The successful implementation of  
4  
5 475 such guidance requires robust measurement of the effectiveness of preventive interventions in  
6  
7 476 adolescence (40).

9  
10  
11 477 Evaluation of the Y-Check intervention will incorporate implementation science and effectiveness  
12  
13 478 research. Such hybrid designs have important advantages over conducting separate studies. These include  
14  
15 479 the potential for quicker translation of intervention research findings into programmes, the development  
16  
17 480 and selection of more effective implementation strategies, and more useful information for decision  
18  
19 481 makers (41).

20  
21  
22  
23 482 The process evaluation findings will provide guidance for the next stage of the programme and for  
24  
25 483 potential future sustainable and scalable implementation by local health authorities should it prove  
26  
27 484 successful. Data on the short-term changes in clinical and behavioural outcomes will be used as inputs to  
28  
29 485 model both short-term and long-term health and social impacts and as inputs to sample size and power  
30  
31 486 calculations for a third phase of the Y-Check research programme, which plans to undertake a rigorous  
32  
33 487 population level evaluation of the impact of routine check-ups on adolescent health and wellbeing.

34  
35  
36  
37  
38 488 Through WHO's advice to member states, findings from the Y-Check study have the potential to shape the  
39  
40 489 delivery of adolescent health check-ups globally including identifying the optimal number, content and  
41  
42 490 delivery for these services. Y-Check will advance the field by providing some of the first rigorous  
43  
44 491 information on the effects of a health screening programme in three African cities, assessing  
45  
46 492 implementation, effectiveness, cost and cost-effectiveness outcomes.

47  
48  
49  
50 493 **Acknowledgements:** The authors thank our Programme Advisors: Prof Simon Gregson, Dr. Sachin Shinde,  
51  
52 494 Prof Fred Binka, Dr. Suzanne Petroni, Prof. Audrey Pettifor, Prof Shane Norris, Prof. James Hargreaves,  
53  
54 495 Ms. Patience Manhibi, Mr Aveneni Mangome. DSMB members are Prof. David Mabey, Dr Andrew Abassa,  
55  
56 496 Prof Fred Binka and Dr Nothando Ngwenya. The authors thank adolescent participants in three countries.

497 The support of participating Ministry officials in Ghana, Tanzania and Zimbabwe is gratefully  
498 acknowledged.

499 **Authors' contributions:** PB, AMD, DAR conceived and drafted the paper. All authors contributed to  
500 writing. BW, SK, AMD, FN, FG and MKN provided country specific inputs. GG contributed to the  
501 economic evaluation section. HAW contributed to the study outcomes and statistical analysis sections.  
502 VB and RAF contributed to the sections on consent, introduction and discussion.

503  
504 Banati P, PhD MPH<sup>1\*</sup>, Ross DA, MA, BMBCh, MSc, PhD<sup>2</sup> Weobong B, MSc, PhD<sup>3</sup>, Kapiga S, MD, MPH,  
505 ScD<sup>4,5</sup>, Weiss HA PhD MSc<sup>6</sup>, Baltag V MD PhD<sup>1</sup>, Nzvere F<sup>5,7</sup>, Glozah F, MPhil, PhD<sup>3</sup>, Nsanya MK, MD, MSc<sup>4</sup>,  
506 Greco G, PhD MSc<sup>5</sup>, Ferrand RA, PhD MBBS<sup>5,7</sup>, and Doyle AM, PhD<sup>6</sup>

507 **Competing interests:** PB and VB are WHO staff members. The opinions expressed are theirs and do not  
508 necessarily represent the policies and positions of the World Health Organization. The other authors  
509 declared no competing interests.

510 **Funding statement:** This work was supported by the Botnar Foundation grant number (RG21-001) and  
511 UKRI (MR/T043156/1)

## 513 References

- 514 1. Bundy DAP, de Silva N, Horton S, Patton GC, Schultz L, Jamison DT. Investment in child and  
515 adolescent health and development: key messages from Disease Control Priorities, 3rd Edition.  
516 Lancet. 2018;391(10121):687-99.
- 517 2. World Bank. World Development Report 2019: The Changing Nature of Work. Washington, DC:  
518 World Bank; 2019.
- 519 3. Tomlinson M, Ross DA, Bahl R, et al. What will it take for children and adolescents to thrive? The  
520 Global Strategy for Women's, Children's, and Adolescents' Health. Lancet Child Adolesc Health.  
521 2019;3(4):208-9.
- 522 4. WHO. Global accelerated action for the health of adolescents (AA-HA!): guidance to support  
523 country implementation, 2017.
- 524 5. WHO. Accelerated Action for the Health of Adolescents (AA-HA! 2.0) Forthcoming. Geneva:  
525 World Health Organization; 2023.
- 526 6. Kuper H, Monteath-van Dok A, Wing K, et al. The impact of disability on the lives of children;  
527 cross-sectional data including 8,900 children with disabilities and 898,834 children without  
528 disabilities across 30 countries. PLoS One. 2014;9(9):e107300.
- 529 7. WHO. Health for the World's Adolescents: A second chance in the second decade. Geneva:  
530 World Health Organization; 2014.
- 531 8. Kruk ME, et al. Improving health and social systems for all children in LMICs: structural  
532 innovations to deliver high-quality services. Lancet. 2022;399(10337):1830-1844.

- 1  
2  
3 533 9. World Health Organization (WHO). Making health services adolescent friendly: developing  
4 534 national quality standards for adolescent friendly health services, 2012.
- 5 535 10. Patton GC, Sawyer SM, Santelli JS, et al. Our future: a Lancet commission on adolescent health  
6 536 and wellbeing. *Lancet*. 2016;387(10036):2423-2478.
- 7 537 11. Sancu L. Clinical preventive services for adolescents: facing the challenge of proving "an ounce of  
8 538 prevention is worth a pound of cure". *J Adolesc Health*. 2011;49(5):450-2.
- 9 539 12. Harris SK, Aalsma MC, Weitzman ER, Garcia-Huidobro D, Wong C, Hadland SE, Santelli J, Park  
10 540 MJ, Ozer EM. Research on clinical preventive services for adolescents and young adults: where  
11 541 are we and where do we need to go?. *Journal of Adolescent Health*. 2017 Mar 1;60(3):249-60.
- 12 542 13. Nagata JM, Hathi S, Ferguson BJ, Hindin MJ, Yoshida S, Ross DA. Research priorities for  
13 543 adolescent health in low- and middle-income countries: A mixed-methods synthesis of two  
14 544 separate exercises. *J Glob Health*. 2018;8(1):doi:10.7189/jogh.08.010501.
- 15 545 14. Bright Futures, American Academy of Pediatrics. Bright Futures. Guidelines for health supervision  
16 546 of infants, children, and adolescents. 2016;4.
- 17 547 15. Royal Australasian College of General Practitioners. Guidelines for Preventive Activities in  
18 548 General Practice, Volume Spec No. 8th ed. East Melbourne: Royal Australasian College of  
19 549 General Practitioners; 2012.
- 20 550 16. WHO. WHO Guideline on School Health Services. 2021.
- 21 551 17. Baltag V, Moran D. Are Routine Health Examinations Fulfilling their Promise for Prevention?  
22 552 *Health Behav Policy Rev*. 2018;5(6):22.
- 23 553 18. Hoffmann TC, Glasziou PP, Boutron I, et al. Better reporting of interventions: template for  
24 554 intervention description and replication (TIDieR) checklist and guide. *BMJ*. 2014;348.
- 25 555 19. Chingono RM, Mackworth-Young CRS, Ross DA, et al. Designing routine health check-ups for  
26 556 adolescents in Zimbabwe. *J Adolesc Health*. 2021;69:940-7.
- 27 557 20. Weobong B, Glozah FN, Abdulai HBT, Koka E, Addae N, Alor S, Kohl K, Banati P, Adongo PB, Ross  
28 558 DA. Reaching adolescents with health services: systematic development of an adolescent health  
29 559 check-ups programme in Ghana (Y-Check, Ghana). (in preparation).
- 30 560 21. Sedekia Y, Mshana G, Nsanya MK, Kohl K, Wambura M, Grosskurth H, Ross DA, Kapiga S.  
31 561 Routine health check-ups for adolescents in Mwanza City, Tanzania: stakeholders'  
32 562 recommendations on its content, venue, and mode of delivery. *BMC public health*. 2023 May  
33 563 30;23(1):1015.
- 34 564 22. WHO. Report of Y check Phase 1 to Botnar Foundation, 2020.
- 35 565 23. Green L, Kreuter M. The precede-proceed model. *Health promotion planning: an educational*  
36 566 *approach*. 3rd ed. Mountain View (CA): Mayfield Publishing Company; 1999. p. 32-43.
- 37 567 24. McLeroy KR, Bibeau D, Steckler A, Glanz K. An ecological perspective on health promotion  
38 568 programs. *Health Educ Q*. 1988;15(4):351-377.
- 39 569 25. UNESCO. Net enrollment statistics available at <http://uis.unesco.org>. Downloaded March 18  
40 570 2023.
- 41 571 26. National Bureau of Statistics. Mwanza Region - Basic Demographic and Socio-Economic Profile  
42 572 (2012 Census) - National Bureau of Statistics (NBS).; 2016.
- 43 573 27. Ilemela Municipal Council. Ilemela Municipal Council Strategic Plan (2016/2021).; 2017.  
44 574 doi:10.5089/9781513547442.002
- 45 575 28. Zimbabwe National Statistics Agency (ZIMSTAT). Education Statistics Report 2018-2020.  
46 576 Published November 2021. Available from: [https://www.zimstat.co.zw/wp-](https://www.zimstat.co.zw/wp-content/uploads/publications/Social/Education/Education_Report_2020.pdf)  
47 577 [content/uploads/publications/Social/Education/Education\\_Report\\_2020.pdf](https://www.zimstat.co.zw/wp-content/uploads/publications/Social/Education/Education_Report_2020.pdf).

- 1  
2  
3 578 29. Zimbabwe Ministry of Primary and Secondary Education (MoPSE). 2021 Primary and Secondary  
4 579 Education Statistics Report. Published May 2022. Available from:  
5 580 [http://mopse.co.zw/sites/default/files/public/downloads/EMIS%202021%20Annual%20Education](http://mopse.co.zw/sites/default/files/public/downloads/EMIS%202021%20Annual%20Education%20Statistics%20Report.pdf)  
6 581 [on%20Statistics%20Report.pdf](http://mopse.co.zw/sites/default/files/public/downloads/EMIS%202021%20Annual%20Education%20Statistics%20Report.pdf).  
7  
8 582 30. Government of Zimbabwe. Zimbabwe School Health Policy. Harare, Zimbabwe; 2018.  
9 583 31. Ghana Health Service. Adolescent health service policy and strategy, 2016-2020. Accra, Ghana  
10 584 Health Service. 2016.  
11 585 32. Government of Tanzania. Health Sector Strategic Plan July 2021 – June 2026 (HSSP V): Leaving  
12 586 No One Behind. Ministry of Health, Community Development, Gender, Elderly and Children, Dar  
13 587 es Salaam; 2021.  
14 588 33. WHO. Global standards for quality health-care services for adolescents: a guide to implement a  
15 589 standards-driven approach to improve the quality of health care services for adolescents. 2015  
16 590 Available from: <https://apps.who.int/iris/handle/10665/183935>.  
17 591 34. WHO. Assessing and supporting adolescents' capacity for autonomous decision-making in health  
18 592 care settings: a tool for health-care providers. Geneva: World Health Organization; 2021.  
19 593 35. Moore GF, Audrey S, Barker M, et al. Process evaluation of complex interventions: Medical  
20 594 Research Council guidance. *BMJ*. 2015;350:h1258.  
21 595 36. WHO and UNESCO. Making every school a health-promoting school: global standards and  
22 596 indicators for health-promoting schools and systems. Geneva: World Health Organization and  
23 597 UNESCO; 2021.  
24 598 37. Baltag V, Pachyna A, Hall J. Global overview of school health services: data from 102 countries.  
25 599 *Health Behav Policy Rev*. 2015;2(4):268-83.  
26 600 38. Levinson J, Kohl K, Baltag V, Ross DA. Investigating the effectiveness of school health services  
27 601 delivered by a health provider: a systematic review of systematic reviews. *PLoS One*.  
28 602 2019;14(6):e0212603.  
29 603 39. Montgomery P, Knerr W, Ross DA, Patterson J. The effectiveness and acceptability of  
30 604 comprehensive and multicomponent school health services: A systematic review. *J Adolesc*  
31 605 *Health*. 2022;70:192-207.  
32 606 40. Banati P, Banerjee A, Daelmans B, Baltag V. The need for new models to measure the impact of  
33 607 prevention. *J Adolesc Health*. 2023;72(1):9-11.  
34 608 41. Curran GM, Bauer M, Mittman B, Pyne JM, Stetler C. Effectiveness-implementation hybrid  
35 609 designs: combining elements of clinical effectiveness and implementation research to enhance  
36 610 public health impact. *Med Care*. 2012;50(3):217-26.  
37  
38  
39  
40  
41  
42  
43  
44  
45  
46  
47  
48  
49  
50  
51  
52  
53  
54  
55  
56  
57  
58  
59  
60

611  
612 **Figure 1: Theory of Change for Y-Check, an adolescent health and wellbeing check-up**

613 **Figure 2: The Y-Check Intervention package<sup>1</sup>**

614

Figure 1: Theory of Change for Y-Check, an adolescent health and wellbeing check-up



Figure 2: The Y-Check Intervention package<sup>1</sup>

### Y-Check screening, on-the-spot care and referral services

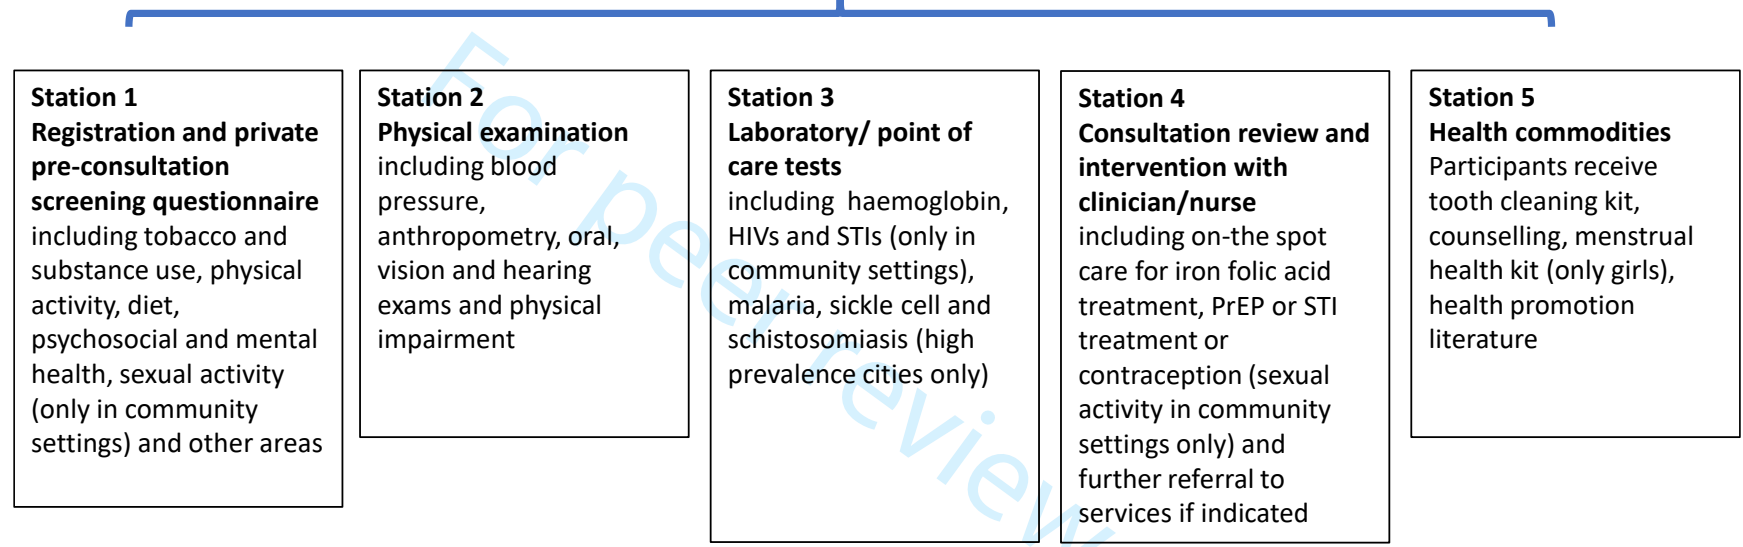

<sup>1</sup> The intervention package may vary according to setting



**Table 1: Template for Intervention Description and Replication (TIDieR) checklist describing the Y-Check intervention**

| Item                      | Item                                                                                                                                                                                                                                                                                                                                                                                                                                                                                                                                                                           |
|---------------------------|--------------------------------------------------------------------------------------------------------------------------------------------------------------------------------------------------------------------------------------------------------------------------------------------------------------------------------------------------------------------------------------------------------------------------------------------------------------------------------------------------------------------------------------------------------------------------------|
| <b>Brief name</b>         |                                                                                                                                                                                                                                                                                                                                                                                                                                                                                                                                                                                |
| 1                         | Evaluating the effectiveness of adolescent health check-ups (Y-Check)                                                                                                                                                                                                                                                                                                                                                                                                                                                                                                          |
| <b>Why?</b>               |                                                                                                                                                                                                                                                                                                                                                                                                                                                                                                                                                                                |
| 2                         | Identifying adolescents with poor health, health-compromising behaviours or undiagnosed disability is important for their health and wellbeing, and also for communities and nations<br>Most adolescents only come into contact with health services when they are ill, and services are not always appropriate for their needs<br>Routine health and wellbeing check-up visits for adolescents that screen for multiple preventable and/or treatable conditions and risk behaviours could provide an entry point into services and be highly cost-effective                   |
| <b>What?</b>              |                                                                                                                                                                                                                                                                                                                                                                                                                                                                                                                                                                                |
| 3                         | The intervention includes a comprehensive health check-up for priority conditions customized to national and local contexts.<br>Where indicated, Y-Check will provide on-the-spot care and cover all clinical costs associated with referrals to further care provided by the public health system or non-governmental organizations (NGOs).<br>During the check-up, adolescents will receive health promotion information and limited supplies of key health commodities.<br>Clinical costs of services are covered by the study if accessed within 4 months of the check-up. |
| 4                         | Adolescent-friendly services will be provided, as defined by WHO (2018). Nationally-approved protocols will be applied. Adolescent privacy and confidentiality will be protected.                                                                                                                                                                                                                                                                                                                                                                                              |
| <b>Who provided?</b>      |                                                                                                                                                                                                                                                                                                                                                                                                                                                                                                                                                                                |
| 5                         | Y-Check teams will be staffed with health professionals trained to provide quality adolescent-friendly health services in line with nationally-approved protocols. Y-Check teams will also be trained in the use of the digital application which will be used for data collection. Public and private not-for-profit care facilities providing referrals will meet national accreditation guidelines.                                                                                                                                                                         |
| <b>How?</b>               |                                                                                                                                                                                                                                                                                                                                                                                                                                                                                                                                                                                |
| 6                         | The Y-Check service will take place over a 60-90 minute period face-to-face. Any referrals will only be subsidized by the study if they take place within 4 months.                                                                                                                                                                                                                                                                                                                                                                                                            |
| <b>Where?</b>             |                                                                                                                                                                                                                                                                                                                                                                                                                                                                                                                                                                                |
| 7                         | The Y-Check service will be provided in schools and community venues, in outdoor tents where required.<br>Referrals will be to public or private not-for-profit providers as close as possible to the adolescent's home. Providers will be vetted by the study team as being able to provide the necessary referral services to national and WHO-recommended standards.                                                                                                                                                                                                        |
| <b>When and How Much?</b> |                                                                                                                                                                                                                                                                                                                                                                                                                                                                                                                                                                                |
| 8                         | Within the current phase of the study, each adolescent will receive Y-Check once. Within a routine programme the intention would be that the intervention will be delivered twice during adolescence, once when the adolescent is 10-14 years old, and a second time when they are 15-19 years old.                                                                                                                                                                                                                                                                            |
| <b>Tailoring</b>          |                                                                                                                                                                                                                                                                                                                                                                                                                                                                                                                                                                                |
| 9                         | The content of the intervention is tailored to local context. The exact set of conditions that will be assessed as part of Y-Check will be adapted based on burden of disease, and availability of local tests and referral services.                                                                                                                                                                                                                                                                                                                                          |
| <b>Modifications</b>      |                                                                                                                                                                                                                                                                                                                                                                                                                                                                                                                                                                                |



1  
2  
3  
4  
5  
6  
7  
8  
9  
10  
11  
12  
13  
14  
15  
16  
17  
18  
19  
20  
21  
22  
23  
24  
25  
26  
27  
28  
29  
30  
31  
32  
33  
34  
35  
36  
37  
38  
39  
40  
41  
42  
43  
44  
45  
46  
47  
48  
49  
50  
51  
52  
53  
54  
55  
56  
57  
58  
59  
60

| Item             | Item                                                                                                                                                   |
|------------------|--------------------------------------------------------------------------------------------------------------------------------------------------------|
| 10               | Any modifications will be reported in the article reporting the results of the study.                                                                  |
| <b>How well?</b> |                                                                                                                                                        |
| 11               | Intervention fidelity (adherence, integrity, quality) will be evaluated through a process evaluation including youth-friendly health services quality. |
| 12               | Intervention fidelity will be reported in the article reporting the results of the study.                                                              |

For peer review only



SPIRIT 2013 Checklist: Recommended items to address in a clinical trial protocol and related documents\*

| Section/item                      | Item No | Description                                                                                                                                                                                                         |
|-----------------------------------|---------|---------------------------------------------------------------------------------------------------------------------------------------------------------------------------------------------------------------------|
| <b>Administrative information</b> |         |                                                                                                                                                                                                                     |
| Title                             | 1       | A hybrid evaluation of implementation and short-term cost-effectiveness of Y-Check, an adolescent health and wellbeing check-up programme in three African cities                                                   |
| Trial registration                | 2a      | Registration Protocol ID WHO/ERC.0003778 28/08/2023                                                                                                                                                                 |
|                                   | 2b      | ClinicalTrials.gov Identifier: NCT06090006                                                                                                                                                                          |
| Protocol version                  | 3       | January 10 2023, Version 4                                                                                                                                                                                          |
| Funding                           | 4       | World Health Organization, Botnar Foundation, UKRI, University of Ghana, Biomedical Research Training Institute Zimbabwe, Mwanza Intervention Trials Unit, Tanzania, London School of Hygiene and Tropical Medicine |

## Roles and responsibilities

5a

| Name of collaborator              | Institute and contact details                                                                                                                                                                                                                                                              |
|-----------------------------------|--------------------------------------------------------------------------------------------------------------------------------------------------------------------------------------------------------------------------------------------------------------------------------------------|
| Perna Banati (Chief investigator) | Research Scientist<br>World Health Organization<br>Ave Appia 20,<br>1211 Geneva, Switzerland                                                                                                                                                                                               |
| Valentina Baltag (co-PI)          | Team lead<br>AYH, MCA<br>World Health Organization<br>Ave Appia 20,<br>1211 Geneva, Switzerland                                                                                                                                                                                            |
| Aoife Doyle (PI Zimbabwe)         | Associate Professor<br>Biomedical Research and Training Institute, Harare, Zimbabwe<br>and<br>MRC International Statistics & Epidemiology Group<br>Department of Infectious Disease Epidemiology and International Health<br>London School of Hygiene & Tropical Medicine<br>Keppel Street |
| Rashida Ferrand (co-PI)           | Professor<br>Biomedical Research and Training Institute, Harare, Zimbabwe<br>and<br>Department of Clinical Research<br>London School of Hygiene & Tropical Medicine<br>Keppel Street                                                                                                       |
| Saidi Kapiga (PI Tanzania)        | Professor<br>Mwanza Intervention Trials Unit,<br>National Institute for Medical Research,<br>Isamilo Road, Mwanza, Tanzania                                                                                                                                                                |
| Helen Weiss (co-PI)               | Professor<br>MRC International Statistics & Epidemiology Group<br>Department of Infectious Disease Epidemiology and International Health<br>London School of Hygiene & Tropical Medicine<br>Keppel Street                                                                                  |
| Benedict Weobong (PI Ghana)       | Lecturer<br>School of Public Health, University of Ghana                                                                                                                                                                                                                                   |
| David Ross (Co-I)                 | Honorary Professor<br>Institute of Life course studies<br>Stellenbosch University<br>Stellenbosch South Africa                                                                                                                                                                             |
| Mussa Nsanya (co-I)               | <i>Research Scientist</i> ,<br>Mwanza Intervention Trials Unit,<br>National Institute for Medical Research,<br>Isamilo Road, Mwanza, Tanzania                                                                                                                                              |
| Gerry Mshana (co-I)               | Principal Research Scientist,<br>Mwanza Intervention Trials Unit, National Institute for Medical Research, Isamilo Road, Mwanza, Tanzania                                                                                                                                                  |
| Yovitha Sedekia (co-I)            | Post-doctoral Fellow,<br>Mwanza Intervention Trials Unit, National Institute for Medical Research, Isamilo Road, Mwanza, Tanzania                                                                                                                                                          |
| Chido Dziva Chikwari (co-I)       | Biomedical Research and Training Institute, Harare, Zimbabwe<br>and<br>Department of Infectious Disease Epidemiology and International Health<br>London School of Hygiene & Tropical Medicine<br>Keppel Street                                                                             |
| Salome Manyau (co-I)              | Biomedical Research and Training Institute, Harare, Zimbabwe                                                                                                                                                                                                                               |
| Farirai Nzvere (co-I)             | Research Manager<br>Biomedical Research and Training Institute, Harare, Zimbabwe                                                                                                                                                                                                           |
| Franklin Glozah (co-I)            | Research Scientist<br>School of Public Health, University of Ghana                                                                                                                                                                                                                         |
| Philip Adongo (co-I)              | Professor<br>School of Public Health, University of Ghana                                                                                                                                                                                                                                  |
| Eric Koka (co-I)                  | Research Scientist<br>University of Cape Coast<br>Ghana                                                                                                                                                                                                                                    |
| Evans Agbeno (co-I)               | Research Scientist<br>University of Cape Coast<br>Ghana                                                                                                                                                                                                                                    |
| Kenneth Addo (Program manager)    | Research manager<br>School of Public Health, University of Ghana                                                                                                                                                                                                                           |
| Hannah Taylor-Abdulai (co-I)      | University of Cape Coast<br>Ghana                                                                                                                                                                                                                                                          |
| Giulia Greco (co-I)               | <i>Assistant Professor in Economics</i><br>Department of Global Health and Development<br>London School of Hygiene & Tropical Medicine<br>Keppel Street<br>London WC1E 7HT, UK                                                                                                             |
| Constance Mackworth-Young (co-I)  | <i>Assistant Professor</i><br>Biomedical Research and Training Institute, Harare, Zimbabwe<br>and<br>Department of Global Health and Development<br>Faculty of Public Health and Policy<br>London School of Hygiene & Tropical Medicine<br>Keppel Street<br>London WC1E 7HT, UK            |
| Victoria Simms (co-I)             | Biomedical Research and Training Institute, Harare, Zimbabwe<br>and<br>MRC International Statistics & Epidemiology Group<br>Department of Infectious Disease Epidemiology and International Health<br>London School of Hygiene & Tropical Medicine<br>Keppel Street<br>London WC1E 7HT, UK |

- 1  
2  
3  
4  
5  
6  
7  
8  
9  
10  
11  
12  
13  
14  
15  
16  
17  
18  
19  
20  
21  
22  
23  
24  
25  
26  
27  
28  
29  
30  
31  
32  
33  
34  
35  
36  
37  
38  
39  
40  
41  
42  
43  
44  
45  
46  
47  
48  
49  
50  
51  
52  
53  
54  
55  
56  
57  
58  
59  
60
- 5b World Health Organization (Study sponsor), Ave Appia 20, 1211 Geneva Switzerland
- 5c Study sponsor provides country coordination, oversight and quality control of study design, data collection, management, analysis, and interpretation; writing of the report
- 5d **Coordinating center** (WHO) provides country coordination, oversight and quality control of study design, data collection, management, analysis, and interpretation, writing of the report. **Implementing centers** (BRTI, MITU, UGSPH) are responsible for identification, recruitment, data collection and completion of national ethical protocols, along with follow up of study participants and adherence to study protocol. **Programme Advisory Committee (independent)** provides research advise and review of technical and scientific aspects to the research, review and comment on papers; provide recommendations for uptake of results. **Data Safety Monitoring Board (DSMB) (independent)** monitors evidence for harm, assess the impact and relevance of external evidence, assess whether study follow up should be stopped earlier, assess data quality, monitor recruitment figures and sample size, consider ethical implications, advise on modifications as needed.

## Background and rationale

6a

To develop and implement a potentially sustainable adolescent health check-up programme in three African cities (Cape Coast, Ghana; Mwanza, Tanzania; Chitungwiza, Zimbabwe) and evaluate the acceptability, feasibility, short-term effects, and cost-effectiveness of the programme to improve adolescents' health and well-being. Systematic reviews have identified individual interventions that are effective at improving various aspects of adolescent health and/or well-being. However, most adolescents only come in contact with health services when they are ill, and services are not always appropriate for their needs. This represents a missed opportunity for early detection of health problems and for health promotion, and for the development of beneficial health-seeking behaviours. Early and sustained engagement with health and social services could reap a triple dividend for human development by improving the health and well-being of adolescents, their health and well-being in adulthood and the health and well-being of their future offspring.

Routine health and well-being check-up visits for adolescents which screen for multiple conditions and risk behaviours, could provide an entry point into services and be highly cost-effective but there is little empirical evidence for their feasibility, acceptability and effects. Many high-income countries have national recommendations related to adolescent health check-ups (largely based on expert opinion). In low- and middle-income settings, preventive health services for adolescents are largely provided in schools, are usually limited to deworming and vaccination campaigns, and do not address other important conditions and risk factors such as nutrition, mental health, or disability. Obtaining evidence on check-ups is a high World Health Organization (WHO) priority for adolescent health research so that they can advise governments on whether or not to start, or to strengthen existing health and well-being check-ups during adolescence and, if so, to develop recommendations for the content and method of delivery of these preventive and promotive contacts.

6b

In our study sites, a contemporaneous comparison group is not required since no routine screening is currently taking place, and as a result, assessments at baseline will serve as the counterfactual for internal comparisons. Similarly, since there is no routine screening and treatment provided to adolescents of the target ages in the study population, a before-after comparison is appropriate since it is plausible to assume that reductions in the prevalence of the chronic conditions between the original Y-Check visit and the follow-up at four months will be due to the interventions provided through Y-Check.

- 1  
2  
3  
4  
5  
6  
7  
8  
9  
10  
11  
12  
13  
14  
15  
16  
17  
18  
19  
20  
21  
22  
23  
24  
25  
26  
27  
28  
29  
30  
31  
32
- Objectives 7
- (1) To develop and pilot test a check-up programme for adolescents that screens for important preventable and treatable health conditions using accurate and acceptable screening tests and provides locally accessible effective interventions.
  - (2) Through a prospective intervention study in selected schools and communities to: Estimate short-term impacts on adolescent health and wellbeing outcomes: clinical outcomes, health-related knowledge and behaviours, intentions, agency, and perceived social support for behaviour change; engagement with health services, Understand, through process evaluation, the feasibility and fidelity of implementation, the acceptability and uptake, and the influence of context. Estimate the cost-effectiveness of the programme in reducing overall disease burden and improving adolescent wellbeing.
  - (3) Obtain information on key parameters needed for the planning of an evaluation study: prevalence of health conditions and behaviours, acceptability of referral, feasibility of following-up programme participants and delivering quality follow-up care, initial estimates of the impact of the programme on longer-term health, educational and wellbeing outcomes based on the short-term implementation and effectiveness outcomes observed in this phase of the research programme, and factors related to the optimal implementation of the Y-Check intervention.
  - (4) To refine the programme and its theory of change, and finalise optimal methods for the measurement of the impact of the programme in future studies.

33  
34  
35  
36  
37  
38  
39  
40  
41  
42  
43  
44  
45  
46  
47  
48  
49

Trial design 8

In this study we propose to conduct implementation science studies to rigorously evaluate the check-ups in real life. We will not conduct a randomized controlled trial (RCT) because the logical next step is to check that it is really feasible and acceptable to deliver the intervention in real life before embarking on a large-scale RCT. As a result, no control group is proposed in this protocol. However, we will include a pilot implementation research study of the intervention that could be tested in the future that will establish the frequency of key health and behavioural outcomes and their short-term impact after 4 months on the health and well-being of the adolescents receiving the intervention through a before-after comparison. We will also use the opportunity to design and pilot test the creation of a Digital Adolescent Health and Well-being Club by recruiting adolescents into the club during the Y-Check screenings.

50  
51  
52  
53  
54  
55  
56  
57  
58  
59  
60

**Methods: Participants, interventions, and outcomes**

## Study setting

9

**Ghana:** Cape Coast Metropolis has a total population of 169,894 with three-quarters of the households residing in urban areas. The population in the age group 11-24 years has a literacy rate of about 97%. In 2016 in Cape Coast, 11,233 (68.8%) of 12-14 year-olds were enrolled in junior high schools while 8,407 (91.6%) of 15-17 year-olds were enrolled in senior high schools. Primary and secondary net enrolment rates in 2018 were 84% and 58%, respectively. There are 36 health facilities (26 public and 10 private), including a regional hospital that serves as a secondary referral facility. In the formative phase of Y-Check four communities (Abura, Efutu, Akon, and Kwaprow) within the Cape Coast metropolitan area were involved. Abura and Kwaprow are relatively affluent communities with trading being the main source of livelihood. Akon and Effutu are relatively poorer communities where fishing and farming dominate economic activity, respectively. A total of 172 participants were involved in the study: 16 Key Informants (10 male); 41 younger adolescents (in one school, 11 students were selected (one additional girl in 8th year participated) (mean age: 12 years; 21 female) and their parents; and 37 older adolescents (mean age: 16 years; 22 female) and their parents. For this phase of Y-Check, the study will be conducted in 8 schools within the catchment area of health facilities in all the four communities in the first phase. **Tanzania:** Mwanza is the second largest city in Tanzania after the commercial city of Dar es Salaam. It is located on the southern shores of Lake Victoria in North-western (NW) Tanzania. It has a population of over 900,000 with an annual growth rate of 3%. The primary traditional economic activities include fishing and industrial fish processing for export markets, subsistence agriculture and large and small-scale mining of gold and diamond. Adolescents aged 10 to 19 years make up 24.2% of the total population. As of 2020, gross primary and secondary school enrolment stood at 96.9% and 31.4% respectively. Available public health services include 26 dispensaries, 5 health centres, 2 district hospitals, 1 regional hospital and 1 tertiary/teaching hospital. This study will be conducted in 4 – 6 purposive selected communities and in up to 8 primary schools and 8 secondary schools within the catchment area of health facilities serving the selected communities in the two districts (Nyamagana and Ilemela) within Mwanza city. **Zimbabwe:** Chitungwiza is the third largest city in Zimbabwe, located approximately 25km south of the capital city, Harare, and has a population of about 456 000. The houses are mostly high-density, single story, detached units with small yards that are generally used for growing vegetables. Most of the people work in Harare, as there is little industry in Chitungwiza. There is one tertiary hospital, 4 public primary healthcare facilities, 20 private medical facilities, and 34 government primary schools (all mixed sex). Four communities and four schools were chosen by Chitungwiza stakeholders to take part in the Y-Check Phase 1 formative work in 2019/20 (High schools: Seke High 6, Zengeza High 1; Primary schools: Dungwiza Primary, Chinembiri Primary). Communities and schools were selected to represent the diversity of wards in the town and took into account economic disparities. The selection of the schools and communities for this study will be conducted in collaboration with stakeholders including MoPSE, MoHCC, and the study Youth Advisory Group (YAG) taking into consideration previous participation in the formative work and the location of other ongoing projects. We will aim to work in four distinct communities which are representative of the urban, peri-urban and rural populations of Chitungwiza. Potentially eligible schools must meet the following criteria: Student population of at least 200 learners in Grade 6 or at least 75 learners in Form 5, and located in or close to one of the selected study communities.

|                                                                                                                                                                                                    |                      |     |                                                                                                                                                                                                                                                                                                                                                                                                                                                                                                                                                                                                                                                                                                                                                                                                                                                                                                                                                                                                                                                                                                                                                                                                                                                                                                                                                                                                                                                                                                                                                                                                                                                                                                    |
|----------------------------------------------------------------------------------------------------------------------------------------------------------------------------------------------------|----------------------|-----|----------------------------------------------------------------------------------------------------------------------------------------------------------------------------------------------------------------------------------------------------------------------------------------------------------------------------------------------------------------------------------------------------------------------------------------------------------------------------------------------------------------------------------------------------------------------------------------------------------------------------------------------------------------------------------------------------------------------------------------------------------------------------------------------------------------------------------------------------------------------------------------------------------------------------------------------------------------------------------------------------------------------------------------------------------------------------------------------------------------------------------------------------------------------------------------------------------------------------------------------------------------------------------------------------------------------------------------------------------------------------------------------------------------------------------------------------------------------------------------------------------------------------------------------------------------------------------------------------------------------------------------------------------------------------------------------------|
| 1<br>2<br>3<br>4<br>5<br>6<br>7<br>8<br>9<br>10<br>11<br>12<br>13<br>14<br>15<br>16<br>17<br>18<br>19<br>20<br>21<br>22<br>23<br>24<br>25<br>26<br>27                                              | Eligibility criteria | 10  | <p>To be included in the study, adolescents aged 10-19 must fall into one of the following categories:</p> <p>1) Be attending selected classes of Year 5 of primary school in Mwanza (median age 11 years); Grade 5/6 of primary school in Chitungwiza (median age 11 years); or Year 1 of Junior Secondary School in Cape Coast (median age 12 years) OR</p> <p>2) Be attending selected classes in Year 3 of Secondary School in Mwanza (median age 17 years), Form 3/4 in Chitungwiza (median age 17 years), or Year 2 of Senior Secondary School in Cape Coast (median age 16 years) OR</p> <p>3) Be resident in a selected community during the time of the Y-Check intervention, and be aged 16-19 years</p> <p>AND</p> <p>4) Have a completed and signed Informed Consent form, or a signed Informed Assent Form and signed Parental/Guardian Informed Consent Form if the adolescent is seen in the community and is below the national age of consent or is seen in a school, irrespective of their age.</p>                                                                                                                                                                                                                                                                                                                                                                                                                                                                                                                                                                                                                                                                              |
| 28<br>29<br>30<br>31<br>32<br>33<br>34<br>35<br>36<br>37<br>38<br>39<br>40<br>41<br>42<br>43<br>44<br>45<br>46<br>47<br>48<br>49<br>50<br>51<br>52<br>53<br>54<br>55<br>56<br>57<br>58<br>59<br>60 | Interventions        | 11a | <p>Y-Check is a novel intervention delivering an adolescent friendly health and wellbeing check-up and where indicated will provide on-the-spot care and/or referral for common conditions on two occasions in adolescence (in young adolescents (10-14 year-olds) – soon after the onset of puberty - and in older adolescents (15-19 year-olds) – when many adolescents become, or are soon to become, sexually active). The intervention will be customised to national and local context. Adolescents will only be screened for conditions that have an accurate, low-cost, acceptable screening test and a locally accessible, effective intervention. The conditions selected for screening will be chosen to reflect the local epidemiological contexts (e.g. screening for malaria will only take place in malaria endemic areas). It will also provide health promotion information and materials to support positive behaviours and healthy lifestyles during adolescence and beyond. Respecting specific requests from the Ministries of Education in all three cities, the study will only include sexual and reproductive health screening and services at the community sites (which only include older adolescents). Locally accessible services will be identified and assessed in terms of their ability to provide the services recommended by local and WHO guidelines, willingness to accept referred adolescents, and the fees charged to the project will be negotiated by the research team for services provided to referred adolescents (where adequate services are not covered by national health insurance schemes, free NGO services or free public health care).</p> |



- 1  
2  
3  
4  
5  
6  
7  
8  
9
- 10  
11  
12  
13  
14  
15  
16  
17  
18  
19  
20  
21  
22  
23  
24  
25  
26  
27  
28  
29  
30  
31  
32  
33  
34  
35  
36  
37  
38  
39  
40  
41  
42  
43  
44  
45  
46  
47  
48  
49  
50  
51  
52  
53  
54  
55  
56  
57  
58  
59  
60
- 11b The consent form identifies the process for withdrawing from the study. If a participant withdraws from the research study and does not consent to further use of their data, we will remove their records from future use to the fullest extent this is possible. As all tests and procedures follow WHO or accredited national guidelines, these will be used as the basis for adaptation, discontinuing or modifying the diagnosis, treatment or care protocols for specific conditions. If urgent care is required during the course of the Y-Check up, they will be supported to attend a local health facility.
- 11c As for any health care, the tests and treatment provided can have side-effects that can be serious or minor. The tests could cause anxiety. The blood test could cause discomfort or a small bruise, as with any other blood test. While the possibility of this happening is low, the informed consent and assent forms will specify these risks clearly to make sure that participants are aware of the possibility. In the unlikely case of an adverse event, the team will be trained to provide care and support, as well as notify the relevant school authorities (for those seen in schools). If urgent care is required, they will be supported to attend a local health facility. Risks will be minimized by explaining the procedures in detail to adolescents during the school sessions, as well as during the process of obtaining informed consent in schools and community venues. Staff will be trained to detect adverse events and a protocol will be in place to ensure action in the rare case that such an event occurs. Table 3 defines the reporting schedule of adverse events. The use of a digital questionnaire is convenient and has the advantage of providing anonymity; however, adolescents may have fears over unauthorised access and trust. There is also a risk to participants of a breach of confidentiality and possible rejection and discrimination by friends and family if they test positive for any of these conditions. The study team will put in place procedures to minimize these risks. The Y-Check team will be trained in good clinical practice, data protection and confidentiality, and counselling for participants testing positive for any previously mentioned conditions.
- 11d There are no prohibitions during the trial period.
- Outcomes 12 The primary outcome will be the proportion of those screening positive for at least one condition who receive appropriate on-the-spot care or complete appropriate referral for all identified conditions within 4 months. This will be measured using data collected at the initial check-up visit and through recovery of referral vouchers given to participants to allow them to access referral services for free during the 4-months after the Y-Check screening. Completed referral is defined as attending at least the first referral appointment.
- Secondary implementation outcomes will include the proportion of those screening positive for each condition who receive appropriate on-the-spot care or complete appropriate referral for that condition within 4 months, the yield of previously untreated conditions, clinical outcomes at 4 months among those who had originally screened positive for each condition, and intervention acceptability, adoption, appropriateness, feasibility, fidelity and cost. Secondary effectiveness outcomes will include knowledge about health services and health behaviours, self-reported agency and self-efficacy to make decisions about their health, self-reported health-related risk and protective behaviours, reported engagement with health services, wellbeing, self-esteem and quality of life, clinical outcomes, and educational outcomes, which will be collected within the Y-Check and follow-up visits. The short-term cost-effectiveness of the intervention will be estimated (calculated by a comparison of the costs of the intervention against the primary and secondary outcomes and including short-term changes in self-reported quality of life).

Participant timeline

13

| Activity                                   | 2021      |     | 2022 |     | 2023 |     |     |     | 2024 |     |     |     | 2025 |     |
|--------------------------------------------|-----------|-----|------|-----|------|-----|-----|-----|------|-----|-----|-----|------|-----|
|                                            | Q 3       | Q 4 | Q 3  | Q 4 | Q 1  | Q 2 | Q 3 | Q 4 | Q 1  | Q 2 | Q 3 | Q 4 | Q 1  | Q 2 |
|                                            | Inception | *   | *    |     |      |     |     |     |      |     |     |     |      |     |
| Intervention development and pilot testing |           |     | *    | *   | *    |     |     |     |      |     |     |     |      |     |
| Implementation of Y-Check                  |           |     |      |     | *    | *   |     |     |      |     |     |     |      |     |
| Research cohort recruitment                |           |     |      |     | *    | *   |     |     |      |     |     |     |      |     |
| Follow-up at 4 months                      |           |     |      |     |      |     | *   |     |      |     |     |     |      |     |
| Process and economic evaluation            |           |     |      |     |      |     |     |     | *    | *   |     |     |      |     |
| Analysis, reporting and dissemination      |           |     |      |     |      |     |     |     |      | *   | *   | *   | *    | *   |

\*Study timeline for Zimbabwe.

Sample size

14

The package will be delivered to 2000 adolescents (500 per gender in each age group), however, the primary outcome is only measured among those who screen positive for at least one condition. Within one age group and gender, if 150 (30%) of 500 participants screen positive for at least one condition, and 75% of those who screen positive are correctly managed (n=112; primary outcome), the 95%CI for correct management will be +/- 7%.

The sample size also allows us to describe prevalence of individual conditions, and proportion with corrective action taken (secondary outcomes). For example, if 50 of 1000 participants in one age group (5%) screen positive for a given condition, and 75% of these have complete referral, the 95%CI will be 62%-87%, or a 95%CI of 35%-65% if 50% complete referral.

Recruitment

15

Participants recruited in schools will be reached through whole school sessions, as well as parent sessions. Participants recruited in communities will be reached through door to door community outreach as well as community meetings.

**Methods: Assignment of interventions (for controlled trials)**

Allocation:

Sequence generation

16a NA

|    |                |     |    |
|----|----------------|-----|----|
| 1  |                |     |    |
| 2  | Allocation     | 16b | NA |
| 3  | concealment    |     |    |
| 4  | mechanism      |     |    |
| 5  | Implementation | 16c | NA |
| 6  |                |     |    |
| 7  | Blinding       | 17a | NA |
| 8  | (masking)      |     |    |
| 9  |                |     |    |
| 10 |                | 17b | NA |
| 11 |                |     |    |

**Methods: Data collection, management, and analysis**

For peer review only

1  
2  
3  
4  
5  
6  
7  
8  
9  
10  
11  
12  
13  
14  
15  
16  
17  
18  
19  
20  
21  
22  
23  
24  
25  
26  
27  
28  
29  
30  
31  
32  
33  
34  
35  
36  
37  
38  
39  
40  
41  
42  
43  
44  
45  
46  
47  
48  
49  
50  
51  
52  
53  
54  
55  
56  
57  
58  
59  
60

## Data collection methods

18a

The data collection and entry processes will be as detailed in Standard Operating Procedures. We will use Open Data Kit (ODK) and the bespoke Y-Check application for electronic capture of quantitative data into custom-designed forms with built-in range, consistency and discrepancy checks. Answers to sensitive questions will be entered by adolescents themselves to reduce social desirability bias. Field supervisors will scan at least 10% of all forms within 48 hours of data collection to check that there are no obvious problems. They will initiate appropriate actions if there are, such as discussing this at the weekly meetings with the field teams, meeting with individual team members, or arranging specific refresher training. In addition, the data management team will continuously monitor the quality of the data through running frequency distributions of the results for each variable in order to identify unlikely patterns and outliers, and these results will be discussed at the weekly field team meetings. Tablets will be password protected and personal identifiers will be stored in an encrypted format. Service use will also be captured in paper logbooks and registers designed for the specific care and prevention services provided. In each case a log will be kept of the number of people reached, products used, tests performed, etc. Logbook data will be entered on to computers on a weekly basis on pre-designed forms.

De-identified field notes, team debriefing summaries, and outputs from Participatory Action Research (i.e. pictures from mapping, scoring and ranking activities) will be stored electronically in password-protected files. Audio recordings of discussions and interviews will be transcribed verbatim or summarised in detail and then translated (if necessary) into English for analysis by the research team and stored electronically in password-protected files. Each transcript will also have an accompanying summary form capturing details of the data collection and basic demographic details of the interviewee, as well as any pertinent issues related to the data collection session. Verbatim quotations may be included in reports or publications, but will only report the category of participant, their sex and age. De-identified routine health facility data on the uptake of health services by adolescents before, during and after the Y-Check implementation period will be collected. One of the senior social scientists on each of the three country teams will sit in on an average of at least 5% of the interviews, workshops etc, with a higher proportion early in the data collection to ensure quality and to provide feedback to the field researchers. We will also aim that one of the senior social scientists on each of the three country teams will review all qualitative transcripts and summaries within a fortnight of them having been collected so that problems related to how the interviews, participatory workshops, etc have been conducted or recorded/summarized will be identified and the opportunity taken for mentorship to happen.

For both quantitative and qualitative data, a major method that we will use to ensure data quality is that the data will be reviewed in real time as they are collected and will not be allowed to accumulate un-reviewed. This should allow problems and inconsistencies to be detected and appropriate steps taken to correct errors early in the data collection process.

1  
2  
3  
4  
5  
6  
7  
8  
9  
10  
11  
12  
13  
14  
15  
16  
17  
18  
19  
20  
21  
22  
23  
24  
25  
26  
27  
28  
29  
30  
31  
32  
33  
34  
35  
36  
37  
38  
39  
40  
41  
42  
43  
44  
45  
46  
47  
48  
49  
50  
51  
52  
53  
54  
55  
56  
57  
58  
59  
60Data  
management

- 18b Children in schools will be followed up through continued engagement with the schools. In communities, follow-up will be via phone numbers and addresses provided at the check-up visit. Data on many secondary outcomes will be missing for those lost to follow-up. However, socio-demographic data and primary outcome data will be available for those who are lost to follow-up and can be used to assess potential biases in secondary outcomes due to lost to follow-up.
- 19 Data collected off-line on tablet computers will later be synchronised over a local research wi-fi network to the ODK server. Any data transfer over wireless or mobile networks will use Virtual Private Networks or router protected dedicated internet protocol addresses. Data will be fully encrypted to comply with general data protection regulation (GDPR) standards, using a public and private key for encryption and decryption, respectively. All electronic data will be stored in password-protected database systems, with access granted to authorised staff only. When necessary, subsets of the redacted database or other data files may be stored on the PI's or senior staff's laptop to permit analyses during visits or travel. Laptop storage will be encrypted and password-protected to protect data from unauthorised access. Data transferred to LSHTM and/or WHO will be held on Secure Servers utilizing storage systems that provides access controls, integrity verification, encryption, automated daily backup and other functionality to ensure data authenticity and security. While records will not be collected on paper, in some situations (loss of wifi) this might be necessary. Paper records will be stored within the PI or Senior staff's office under lock and key, with access granted only to authorized staff. All data will be stored in multiple secure locations to guard against data loss, and will be stored in date-stamped folders to allow reconstruction of datasets from earlier versions in the unlikely event of a later file becoming corrupted.

view only

1  
2  
3  
4  
5  
6  
7  
8  
9  
10  
11  
12  
13  
14  
15  
16  
17  
18  
19  
20  
21  
22  
23  
24  
25  
26  
27  
28  
29  
30  
31  
32  
33  
34  
35  
36  
37  
38  
39  
40  
41  
42  
43  
44  
45  
46  
47  
48  
49  
50  
51  
52  
53  
54  
55  
56  
57  
58  
59  
60

Statistical  
methods

20a All primary analyses will be conducted separately by study city; Cape Coast, Chitungwiza and Mwanza. Where comparable, secondary analyses will be conducted with the data from all three cities combined.

**Validation study**

Data will be analysed to calculate the following measures: sensitivity, specificity, positive predictive value, negative predictive value.

**Programmatic data**

Quantitative programmatic data including screening tests results, services delivered, and referrals made and completed will be described according to age, sex, and location.

**Prospective intervention study**

We will follow the STROBE guidelines for the reporting of cohort studies. We will create a flowchart showing the number of communities and schools and the number of participants per community and school at each contact point in the cohort study. We will use descriptive analysis to compare the community-level and school-level characteristics of the study communities and schools.

The primary outcome is a single proportion which will be presented with a 95% confidence interval for each of the 4 target populations: 10-14 year old male, 10-14 year old female, 15-19 year old male, 15-19 year old female. Secondary outcomes which are measured at a single time point will be presented in a similar way. For outcomes which are measured at two or more time-points, a before-after analysis will be conducted comparing differences in measures between the two time-points. The unit of analysis will be the individual. For clinical outcomes which are measured at two or more time-points, the initial check-up visit (baseline) will give the prevalence of undiagnosed and untreated chronic conditions which will represent the counterfactual. The proportion of undiagnosed and untreated chronic conditions at the 4-month follow-up visit will be formally compared to this counterfactual to estimate the effects of the intervention in improving these clinical outcomes. We will assess health service and client determinants of correct management of conditions at 4 months using multivariable regression. A statistical analysis plan is available.

20b All analyses will be disaggregated by age and gender.

20c NA

**Methods: Monitoring**

|    |                                 |     |                                                                                                                                                                                                                                                                                                                                                                                                                                                                                                                                                                                                                                           |
|----|---------------------------------|-----|-------------------------------------------------------------------------------------------------------------------------------------------------------------------------------------------------------------------------------------------------------------------------------------------------------------------------------------------------------------------------------------------------------------------------------------------------------------------------------------------------------------------------------------------------------------------------------------------------------------------------------------------|
| 1  |                                 |     |                                                                                                                                                                                                                                                                                                                                                                                                                                                                                                                                                                                                                                           |
| 2  | Data monitoring                 | 21a | The Data Safety Monitoring Board (DSMB) members will receive and review information on the progress and accruing data of this study. The DSMB should inform the Chair of the PAC if, in their view the results are likely to convince a broad range of clinicians, including those supporting the study and the general clinical community, that, on balance, provision of the Y-Check service is contraindicated for all participants or a particular category of participants, and there was a reasonable expectation that this new evidence would materially influence patient management. The members of the DSMB for this study are: |
| 3  |                                 |     |                                                                                                                                                                                                                                                                                                                                                                                                                                                                                                                                                                                                                                           |
| 4  |                                 |     |                                                                                                                                                                                                                                                                                                                                                                                                                                                                                                                                                                                                                                           |
| 5  |                                 |     |                                                                                                                                                                                                                                                                                                                                                                                                                                                                                                                                                                                                                                           |
| 6  |                                 |     |                                                                                                                                                                                                                                                                                                                                                                                                                                                                                                                                                                                                                                           |
| 7  |                                 |     |                                                                                                                                                                                                                                                                                                                                                                                                                                                                                                                                                                                                                                           |
| 8  |                                 |     |                                                                                                                                                                                                                                                                                                                                                                                                                                                                                                                                                                                                                                           |
| 9  |                                 |     |                                                                                                                                                                                                                                                                                                                                                                                                                                                                                                                                                                                                                                           |
| 10 |                                 |     | 1. Prof Fred Binka, Professor of Clinical Epidemiology, School of Public Health, University of Health and Allied Sciences, Ho, Ghana. Chair, Clinician                                                                                                                                                                                                                                                                                                                                                                                                                                                                                    |
| 11 |                                 |     | 2. Dr Andrew Abassa, Head of Statistics, MRC/UVRI Uganda Research Unit, Entebbe, Uganda. Statistician                                                                                                                                                                                                                                                                                                                                                                                                                                                                                                                                     |
| 12 |                                 |     | 3. Prof David Mabey, Professor, London School of Hygiene and Tropical medicine, Clinician                                                                                                                                                                                                                                                                                                                                                                                                                                                                                                                                                 |
| 13 |                                 |     | 4. Dr Nothando Ngwenya, Head of Social Science and Research Ethics, AHRI, South Africa                                                                                                                                                                                                                                                                                                                                                                                                                                                                                                                                                    |
| 14 |                                 |     |                                                                                                                                                                                                                                                                                                                                                                                                                                                                                                                                                                                                                                           |
| 15 |                                 |     |                                                                                                                                                                                                                                                                                                                                                                                                                                                                                                                                                                                                                                           |
| 16 |                                 |     |                                                                                                                                                                                                                                                                                                                                                                                                                                                                                                                                                                                                                                           |
| 17 |                                 |     |                                                                                                                                                                                                                                                                                                                                                                                                                                                                                                                                                                                                                                           |
| 18 |                                 |     |                                                                                                                                                                                                                                                                                                                                                                                                                                                                                                                                                                                                                                           |
| 19 |                                 | 21b | The DSMB will be notified in the event of any adverse events. Final decision to terminate the study will rest with the study sponsor.                                                                                                                                                                                                                                                                                                                                                                                                                                                                                                     |
| 20 |                                 |     |                                                                                                                                                                                                                                                                                                                                                                                                                                                                                                                                                                                                                                           |
| 21 |                                 |     |                                                                                                                                                                                                                                                                                                                                                                                                                                                                                                                                                                                                                                           |
| 22 | Harms                           | 22  | The DSMB will be notified in the event of any adverse events and make recommendations to the study sponsors.                                                                                                                                                                                                                                                                                                                                                                                                                                                                                                                              |
| 23 |                                 |     |                                                                                                                                                                                                                                                                                                                                                                                                                                                                                                                                                                                                                                           |
| 24 |                                 |     |                                                                                                                                                                                                                                                                                                                                                                                                                                                                                                                                                                                                                                           |
| 25 | Auditing                        | 23  | NA                                                                                                                                                                                                                                                                                                                                                                                                                                                                                                                                                                                                                                        |
| 26 |                                 |     |                                                                                                                                                                                                                                                                                                                                                                                                                                                                                                                                                                                                                                           |
| 27 | <b>Ethics and dissemination</b> |     |                                                                                                                                                                                                                                                                                                                                                                                                                                                                                                                                                                                                                                           |
| 28 |                                 |     |                                                                                                                                                                                                                                                                                                                                                                                                                                                                                                                                                                                                                                           |
| 29 | Research ethics approval        | 24  | Ethical clearance has been received from WHO Registration Protocol ID WHO/ERC.0003778 28/08/2023, from London School of Hygiene and Tropical Medicine Approval numbers 26395 and 28312 and from all country national ethics bodies.                                                                                                                                                                                                                                                                                                                                                                                                       |
| 30 |                                 |     |                                                                                                                                                                                                                                                                                                                                                                                                                                                                                                                                                                                                                                           |
| 31 |                                 |     |                                                                                                                                                                                                                                                                                                                                                                                                                                                                                                                                                                                                                                           |
| 32 |                                 |     |                                                                                                                                                                                                                                                                                                                                                                                                                                                                                                                                                                                                                                           |
| 33 |                                 |     |                                                                                                                                                                                                                                                                                                                                                                                                                                                                                                                                                                                                                                           |
| 34 | Protocol amendments             | 25  | Protocol modifications have been submitted to WHO ethics review committee, LSHTM and national ethics boards and approved by all.                                                                                                                                                                                                                                                                                                                                                                                                                                                                                                          |
| 35 |                                 |     |                                                                                                                                                                                                                                                                                                                                                                                                                                                                                                                                                                                                                                           |
| 36 |                                 |     |                                                                                                                                                                                                                                                                                                                                                                                                                                                                                                                                                                                                                                           |
| 37 |                                 |     |                                                                                                                                                                                                                                                                                                                                                                                                                                                                                                                                                                                                                                           |
| 38 |                                 |     |                                                                                                                                                                                                                                                                                                                                                                                                                                                                                                                                                                                                                                           |
| 39 |                                 |     |                                                                                                                                                                                                                                                                                                                                                                                                                                                                                                                                                                                                                                           |
| 40 |                                 |     |                                                                                                                                                                                                                                                                                                                                                                                                                                                                                                                                                                                                                                           |
| 41 |                                 |     |                                                                                                                                                                                                                                                                                                                                                                                                                                                                                                                                                                                                                                           |
| 42 |                                 |     |                                                                                                                                                                                                                                                                                                                                                                                                                                                                                                                                                                                                                                           |
| 43 |                                 |     |                                                                                                                                                                                                                                                                                                                                                                                                                                                                                                                                                                                                                                           |
| 44 |                                 |     |                                                                                                                                                                                                                                                                                                                                                                                                                                                                                                                                                                                                                                           |
| 45 |                                 |     |                                                                                                                                                                                                                                                                                                                                                                                                                                                                                                                                                                                                                                           |
| 46 |                                 |     |                                                                                                                                                                                                                                                                                                                                                                                                                                                                                                                                                                                                                                           |
| 47 |                                 |     |                                                                                                                                                                                                                                                                                                                                                                                                                                                                                                                                                                                                                                           |
| 48 |                                 |     |                                                                                                                                                                                                                                                                                                                                                                                                                                                                                                                                                                                                                                           |
| 49 |                                 |     |                                                                                                                                                                                                                                                                                                                                                                                                                                                                                                                                                                                                                                           |
| 50 |                                 |     |                                                                                                                                                                                                                                                                                                                                                                                                                                                                                                                                                                                                                                           |
| 51 |                                 |     |                                                                                                                                                                                                                                                                                                                                                                                                                                                                                                                                                                                                                                           |
| 52 |                                 |     |                                                                                                                                                                                                                                                                                                                                                                                                                                                                                                                                                                                                                                           |
| 53 |                                 |     |                                                                                                                                                                                                                                                                                                                                                                                                                                                                                                                                                                                                                                           |
| 54 |                                 |     |                                                                                                                                                                                                                                                                                                                                                                                                                                                                                                                                                                                                                                           |
| 55 |                                 |     |                                                                                                                                                                                                                                                                                                                                                                                                                                                                                                                                                                                                                                           |
| 56 |                                 |     |                                                                                                                                                                                                                                                                                                                                                                                                                                                                                                                                                                                                                                           |
| 57 |                                 |     |                                                                                                                                                                                                                                                                                                                                                                                                                                                                                                                                                                                                                                           |
| 58 |                                 |     |                                                                                                                                                                                                                                                                                                                                                                                                                                                                                                                                                                                                                                           |
| 59 |                                 |     |                                                                                                                                                                                                                                                                                                                                                                                                                                                                                                                                                                                                                                           |
| 60 |                                 |     |                                                                                                                                                                                                                                                                                                                                                                                                                                                                                                                                                                                                                                           |

1  
2 Consent or assent 26a To respect the autonomy of adolescents the decision of the minor should prevail. As  
3 a result, prior to the visit, adolescents will be shared the assent forms. After  
4 adolescents have assented, parents/guardians who would like their adolescent to  
5 receive the check-up will be asked to provide written parent/guardian consent.  
6 On the day of the check-up visit, a verbal confirmation will be requested from the  
7 adolescent. This will be the case for all adolescents taking part in Y-Check in school  
8 settings. In community settings, we can expect older and possibly emancipated  
9 minors to be participants of the Y-Check service. In Ghana and Tanzania where the  
10 age of consent to medical and health-related research is 18 years, adolescents who  
11 are not deemed emancipated minors will provide completed parental consent  
12 forms and provide written assent before proceeding through the check-up visit. In  
13 Zimbabwe where the age of consent to medical and health-related research is 16  
14 years, clients aged 16 years and above who attend the check-ups in the community  
15 venues will be allowed to provide written consent for themselves. Emancipated  
16 minors will be treated as though they were above the nationally-applicable age of  
17 consent. The risks and benefits of the Y-Check intervention will be described to  
18 participants and their parents/guardians during the consent/assent process.  
19 Adolescents receiving parental consent will be informed that their parents will be  
20 notified of test results. Y-Check participants will benefit from early detection of  
21 health problems, health promotion, and the promotion of beneficial health-seeking  
22 behaviours. However, some conditions such as mental health disorders, HIV and  
23 sexually transmitted infections (STIs) are associated with stigma and anxiety. The Y-  
24 Check team will be trained in good clinical practice (GCP), data protection and  
25 confidentiality, and will provide counselling for participants testing positive for any  
26 condition. Furthermore, the protocols and procedures for communicating with  
27 adolescents and their families will be carefully developed in collaboration with the  
28 three Youth Advisory Groups (YAGs)/Community Advisory Board (CAB) and  
29 community stakeholders.  
30

31  
32 26b NA  
33  
34  
35  
36  
37  
38  
39  
40  
41  
42  
43  
44  
45  
46  
47  
48  
49  
50  
51  
52  
53  
54  
55  
56  
57  
58  
59  
60



## Confidentiality

27

The protocol for sharing the results of the screening tests will vary according to the perceived seriousness of the condition and/or the seriousness of any stigma associated with the condition, and the age of the participant. A final decision on the classification of conditions as being either more or less serious or seriously stigmatized will be taken in collaboration with adolescents and stakeholders during Year 1. More serious and/or seriously stigmatised conditions may include HIV, STIs, pregnancy, drug use, excessive alcohol use, experiencing violence, suspected epilepsy, severe depressive or severe anxiety symptoms and serious musculoskeletal disorders. Less serious and/or less seriously stigmatised conditions may include anaemia, overweight, underweight, pre-hypertension, hypertension, mild depressive or mild anxiety symptoms, myopia or a hearing disorder. Adolescents who are of majority age or deemed emancipated minors will be given their results directly at the time of the screening. Although they will be encouraged to disclose and discuss the results with their parents, unless they think this would put themselves at risk, the Y-Check team will not disclose their results to their parents unless the adolescent asks for a joint meeting with their parents to discuss them. For all other cases: 1) in the event that the adolescent has no positive test results nor clinically important findings – a letter will be sent home with the child disclosing this information and encouraging continued healthy behaviours. The adolescent will also receive a one-page summary telling them what has been checked for and that nothing serious has been found. They will be encouraged to continue good health-related behaviours. The letter will remind them about health and well-being services available at the school, local health facilities and in the community. 2) in the event that the adolescent is not diagnosed with any condition that requires follow-up or referral (see below) but is diagnosed with a condition that is relatively minor (such as being overweight but not obese) – a letter will be sent home with the child that discloses the results and provides information that promotes and enables self-management, and encourages assistance from their parents. 3) in the event that the adolescent is not diagnosed with any condition that requires referral (see below) but is diagnosed with a condition that is relatively minor but needs follow-up (such as moderate anaemia) – a letter will be sent home with the child that discloses the results, provides information to the parent, and offers the opportunity for the parent to make an appointment with a member of the Y-Check team for further advice regarding the follow-up that may be required (eg. reassessment of the adolescent's haemoglobin concentration after the three months of iron and folate treatment provided by Y-Check has been completed). 4) in the event that the adolescent is not diagnosed with any condition that requires referral and is stigmatizing (see below) but is diagnosed with a condition that requires referral but is not stigmatizing (such as myopia) – a letter will be sent home with the child that discloses the results and provides information to the parent. The parent will be offered the opportunity to make an appointment to meet with a member of the Y-Check team for further advice regarding the condition and the referral. If the parent does not take up the offer of an appointment, the study team will consult with the adolescent, and – if the adolescent gives their permission - school, health or social care staff before deciding on next steps. Potential action would include contacting the parent by phone or through a home visit. 5) in the event that the adolescent is diagnosed with a condition that is considered to be more serious and/or more seriously stigmatizing (such as HIV or epilepsy) – a letter will be sent home with the child that does not disclose results. Parents will be invited and encouraged to make an appointment with the Y-Check nurse/clinician or counsellor to discuss the adolescent's health. The nurse/clinician or counsellor would then meet with the adolescent and the parent together and would explain the condition or suspected condition and what is being recommended. They will ask for the parent's support to manage the condition and answer any questions and give advice/support as needed. If the parent does not take up the offer of an appointment, the study team will consult with the adolescent, and – if the adolescent gives their permission - school, health or social care staff before deciding on next steps. Potential action would include contacting the parent by phone or through a home visit, and, in emergency situations only, referring the young person to health/social services without the support of the parent.

For Y-Check in community settings, the adolescent will receive the letter directly and will be encouraged to share it with their parents/guardians. For Y-Check in school settings, the letter will be sent from Y-Check via the school to the adolescent's parents. All such letters to parents/guardians will be in sealed envelopes addressed to the "Private and Confidential: to the Parent/Guardian of <name of adolescent. In this study, SRH services are only provided in community settings. In Zimbabwe, community services will be provided to 16-19 year-olds, and adolescents who are 16+ in Zimbabwe are able to consent themselves, and therefore no parental disclosure is required, though we will suggest that adolescents inform their parents if they think that they will be able to provide support. In Ghana and Tanzania, older adolescents (16y+) will be able to access Y-Check in community settings. Unless they are deemed emancipated minors (section 7.5), they will require parental consent. The consent and assent forms note that test results will be disclosed to the parent.

We feel that parents have an important role to play in supporting legal minors, especially after diagnosis of highly stigmatizing conditions, including supporting them emotionally, connecting them with services, treatment or follow-up care. As a result, rather than apply a universal rule for this group, we propose development of a process that respects the best interest of the adolescent, that will enable the clinician to determine the benefits and risks of parental disclosure on a case-by-case basis. We will work during the first part of this study to discuss this with national and international clinicians and researchers as well as global and local ethics boards to determine what is the right course of action.

#### Victims of rape/sexual abuse

In the event that the Y-Check team discovers a case of rape or sexual abuse amongst the participants, the matter shall be referred to the Social Services department. Participants will be told of this legal requirement during the consent procedure so they can decide whether or not they wish to report any such events.

|    |                 |     |                                                                              |
|----|-----------------|-----|------------------------------------------------------------------------------|
| 1  |                 |     |                                                                              |
| 2  | Declaration of  | 28  | The principal investigators have no completing interests.                    |
| 3  | interests       |     |                                                                              |
| 4  | Access to data  | 29  | All PIs and co-investigators will have access to the data. Once the study is |
| 5  |                 |     | completed, all data will be placed into an open access repository.           |
| 6  |                 |     | Data will be deidentified and anonymised to ensure confidentiality and       |
| 7  |                 |     | participant privacy                                                          |
| 8  |                 |     |                                                                              |
| 9  | Ancillary and   | 30  | NA                                                                           |
| 10 | post-trial care |     |                                                                              |
| 11 |                 |     |                                                                              |
| 12 | Dissemination   | 31a | A publications policy has been developed. Results will be published in       |
| 13 | policy          |     | at least 3 country specific peer reviewed journal publications and one       |
| 14 |                 |     | multicountry publication. There will also be videos, briefs, and             |
| 15 |                 |     | webinars to disseminate results.                                             |
| 16 |                 |     |                                                                              |
| 17 |                 | 31b | Topics suggested for presentation or publication will be circulated to       |
| 18 |                 |     | the PIs of the management team, with an abstract, proposed                   |
| 19 |                 |     | authorship and proposed journal. A writing committee will be formed          |
| 20 |                 |     | as described in the publications policy. Disputes regarding authorship       |
| 21 |                 |     | will be settled as per the publication policy, and ultimately by the Lead    |
| 22 |                 |     | PI if required.                                                              |
| 23 |                 |     |                                                                              |
| 24 |                 | 31c | All data will be placed into an open access repository. Data will be         |
| 25 |                 |     | deidentified and anonymised to ensure confidentiality and participant        |
| 26 |                 |     | privacy.                                                                     |
| 27 |                 |     |                                                                              |

## Appendices

|    |                  |    |                                                                                                                                                                                                                                                                                                                                                                                                                                                                                                                                                                                                                                                                                                                                                                                                                                                                                                                                                                               |
|----|------------------|----|-------------------------------------------------------------------------------------------------------------------------------------------------------------------------------------------------------------------------------------------------------------------------------------------------------------------------------------------------------------------------------------------------------------------------------------------------------------------------------------------------------------------------------------------------------------------------------------------------------------------------------------------------------------------------------------------------------------------------------------------------------------------------------------------------------------------------------------------------------------------------------------------------------------------------------------------------------------------------------|
| 28 |                  |    |                                                                                                                                                                                                                                                                                                                                                                                                                                                                                                                                                                                                                                                                                                                                                                                                                                                                                                                                                                               |
| 29 |                  |    |                                                                                                                                                                                                                                                                                                                                                                                                                                                                                                                                                                                                                                                                                                                                                                                                                                                                                                                                                                               |
| 30 | Informed consent | 32 | Attached in the submission to Ethics Review Committee.                                                                                                                                                                                                                                                                                                                                                                                                                                                                                                                                                                                                                                                                                                                                                                                                                                                                                                                        |
| 31 | materials        |    |                                                                                                                                                                                                                                                                                                                                                                                                                                                                                                                                                                                                                                                                                                                                                                                                                                                                                                                                                                               |
| 32 |                  |    |                                                                                                                                                                                                                                                                                                                                                                                                                                                                                                                                                                                                                                                                                                                                                                                                                                                                                                                                                                               |
| 33 | Biological       | 33 | The laboratory tests will be conducted by a trained laboratory technician or                                                                                                                                                                                                                                                                                                                                                                                                                                                                                                                                                                                                                                                                                                                                                                                                                                                                                                  |
| 34 | specimens        |    | laboratory assistant and will include:                                                                                                                                                                                                                                                                                                                                                                                                                                                                                                                                                                                                                                                                                                                                                                                                                                                                                                                                        |
| 35 |                  |    | <ul style="list-style-type: none"> <li>• Anaemia, using haemoglobin measurement</li> <li>• HIV testing for older adolescents using a HIV oral mucosal transudate test with confirmatory blood testing using Rapid Diagnostic Tests</li> <li>• STI testing for the older adolescents using GeneXpert for Chlamydia trachomatis (CT) and Neisseria gonorrhoeae (NG) and a lateral flow assay for trichomonas vaginalis (TV).</li> <li>• In the two cities where the prevalence of malaria is expected to be high (Mwanza and Cape Coast), all participants will be tested for malaria parasites using the rapid diagnostic test that is recommended by the national malaria control programme.</li> <li>• In the two cities where the prevalence of schistosomiasis is thought to be high (Mwanza and Cape Coast), all participants will be asked to provide both a urine specimen that be tested for <i>Schistosoma haematobium</i> and <i>Schistosoma mansoni</i>.</li> </ul> |
| 36 |                  |    |                                                                                                                                                                                                                                                                                                                                                                                                                                                                                                                                                                                                                                                                                                                                                                                                                                                                                                                                                                               |
| 37 |                  |    |                                                                                                                                                                                                                                                                                                                                                                                                                                                                                                                                                                                                                                                                                                                                                                                                                                                                                                                                                                               |
| 38 |                  |    |                                                                                                                                                                                                                                                                                                                                                                                                                                                                                                                                                                                                                                                                                                                                                                                                                                                                                                                                                                               |
| 39 |                  |    |                                                                                                                                                                                                                                                                                                                                                                                                                                                                                                                                                                                                                                                                                                                                                                                                                                                                                                                                                                               |
| 40 |                  |    |                                                                                                                                                                                                                                                                                                                                                                                                                                                                                                                                                                                                                                                                                                                                                                                                                                                                                                                                                                               |
| 41 |                  |    |                                                                                                                                                                                                                                                                                                                                                                                                                                                                                                                                                                                                                                                                                                                                                                                                                                                                                                                                                                               |
| 42 |                  |    |                                                                                                                                                                                                                                                                                                                                                                                                                                                                                                                                                                                                                                                                                                                                                                                                                                                                                                                                                                               |
| 43 |                  |    |                                                                                                                                                                                                                                                                                                                                                                                                                                                                                                                                                                                                                                                                                                                                                                                                                                                                                                                                                                               |
| 44 |                  |    |                                                                                                                                                                                                                                                                                                                                                                                                                                                                                                                                                                                                                                                                                                                                                                                                                                                                                                                                                                               |
| 45 |                  |    |                                                                                                                                                                                                                                                                                                                                                                                                                                                                                                                                                                                                                                                                                                                                                                                                                                                                                                                                                                               |
| 46 |                  |    |                                                                                                                                                                                                                                                                                                                                                                                                                                                                                                                                                                                                                                                                                                                                                                                                                                                                                                                                                                               |
| 47 |                  |    |                                                                                                                                                                                                                                                                                                                                                                                                                                                                                                                                                                                                                                                                                                                                                                                                                                                                                                                                                                               |
| 48 |                  |    |                                                                                                                                                                                                                                                                                                                                                                                                                                                                                                                                                                                                                                                                                                                                                                                                                                                                                                                                                                               |
| 49 |                  |    |                                                                                                                                                                                                                                                                                                                                                                                                                                                                                                                                                                                                                                                                                                                                                                                                                                                                                                                                                                               |
| 50 |                  |    |                                                                                                                                                                                                                                                                                                                                                                                                                                                                                                                                                                                                                                                                                                                                                                                                                                                                                                                                                                               |
| 51 |                  |    |                                                                                                                                                                                                                                                                                                                                                                                                                                                                                                                                                                                                                                                                                                                                                                                                                                                                                                                                                                               |
| 52 |                  |    |                                                                                                                                                                                                                                                                                                                                                                                                                                                                                                                                                                                                                                                                                                                                                                                                                                                                                                                                                                               |
| 53 |                  |    |                                                                                                                                                                                                                                                                                                                                                                                                                                                                                                                                                                                                                                                                                                                                                                                                                                                                                                                                                                               |
| 54 |                  |    |                                                                                                                                                                                                                                                                                                                                                                                                                                                                                                                                                                                                                                                                                                                                                                                                                                                                                                                                                                               |
| 55 |                  |    |                                                                                                                                                                                                                                                                                                                                                                                                                                                                                                                                                                                                                                                                                                                                                                                                                                                                                                                                                                               |
| 56 |                  |    | No samples will be stored. All samples will be destroyed after testing is                                                                                                                                                                                                                                                                                                                                                                                                                                                                                                                                                                                                                                                                                                                                                                                                                                                                                                     |
| 57 |                  |    | completed.                                                                                                                                                                                                                                                                                                                                                                                                                                                                                                                                                                                                                                                                                                                                                                                                                                                                                                                                                                    |
| 58 |                  |    |                                                                                                                                                                                                                                                                                                                                                                                                                                                                                                                                                                                                                                                                                                                                                                                                                                                                                                                                                                               |
| 59 |                  |    |                                                                                                                                                                                                                                                                                                                                                                                                                                                                                                                                                                                                                                                                                                                                                                                                                                                                                                                                                                               |
| 60 |                  |    |                                                                                                                                                                                                                                                                                                                                                                                                                                                                                                                                                                                                                                                                                                                                                                                                                                                                                                                                                                               |

1 \*It is strongly recommended that this checklist be read in conjunction with the SPIRIT 2013  
2 Explanation & Elaboration for important clarification on the items. Amendments to the  
3 protocol should be tracked and dated. The SPIRIT checklist is copyrighted by the SPIRIT  
4 Group under the Creative Commons "[Attribution-NonCommercial-NoDerivs 3.0 Unported](#)"  
5 license.  
6  
7  
8  
9  
10  
11  
12  
13  
14  
15  
16  
17  
18  
19  
20  
21  
22  
23  
24  
25  
26  
27  
28  
29  
30  
31  
32  
33  
34  
35  
36  
37  
38  
39  
40  
41  
42  
43  
44  
45  
46  
47  
48  
49  
50  
51  
52  
53  
54  
55  
56  
57  
58  
59  
60

For peer review only
